# Supplementary material
Source: publisher figshare collection journal article supplement (https://acs.figshare.com/ndownloader/files/3864145)

# Supporting Information

L. Kersten, K. Harms and G. Hilt\*

*“Synthesis of Tri-, Tetra- and Pentacarbonyl Derivatives via Ozonolysis of 1,4-Dienes and Cyclization to Polyaromatic Systems”*

## Content:

|                                                               |            |
|---------------------------------------------------------------|------------|
| X-ray crystal structures of compounds <b>45</b> and <b>47</b> | S 2        |
| $^1\text{H}$ / $^{13}\text{C}\{^1\text{H}\}$ NMR spectra      | S 3 – S 42 |

## Corresponding author:

*Prof. Dr. Gerhard Hilt*

Fachbereich Chemie

Philipps-Universität Marburg

Hans-Meerwein-Straße

35043 Marburg

Germany

Hilt@chemie.uni-marburg.de

X-ray crystal structure of compound **45**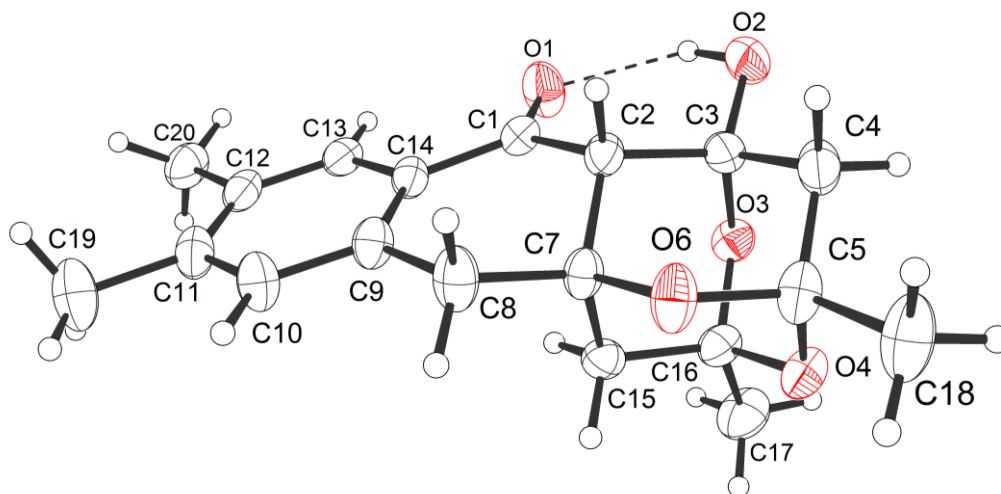X-ray crystal structure of compound **47**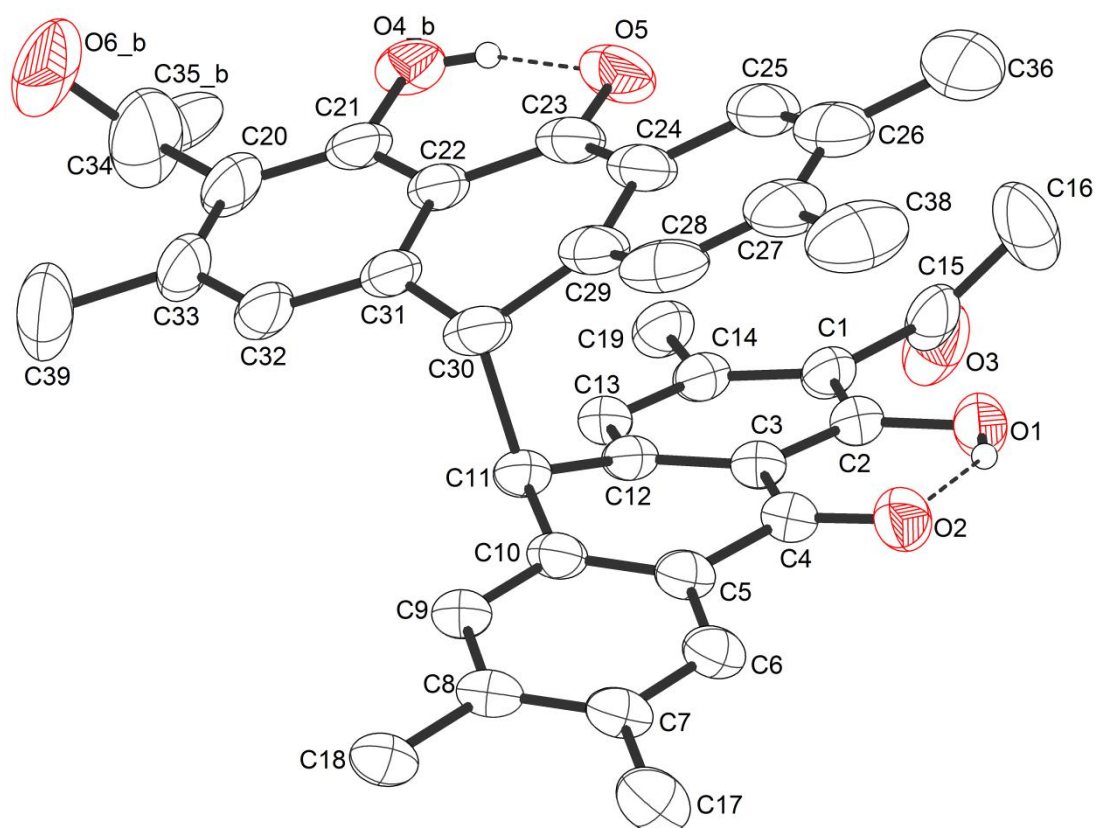

The crystal structures have been deposited at the Cambridge Crystallographic Data Centre and allocated the deposition number CCDC 1027957 and CCDC 1027958.

**2-Allyl-4,5-dimethylbenzaldehyde (13)**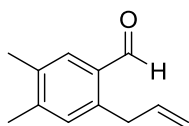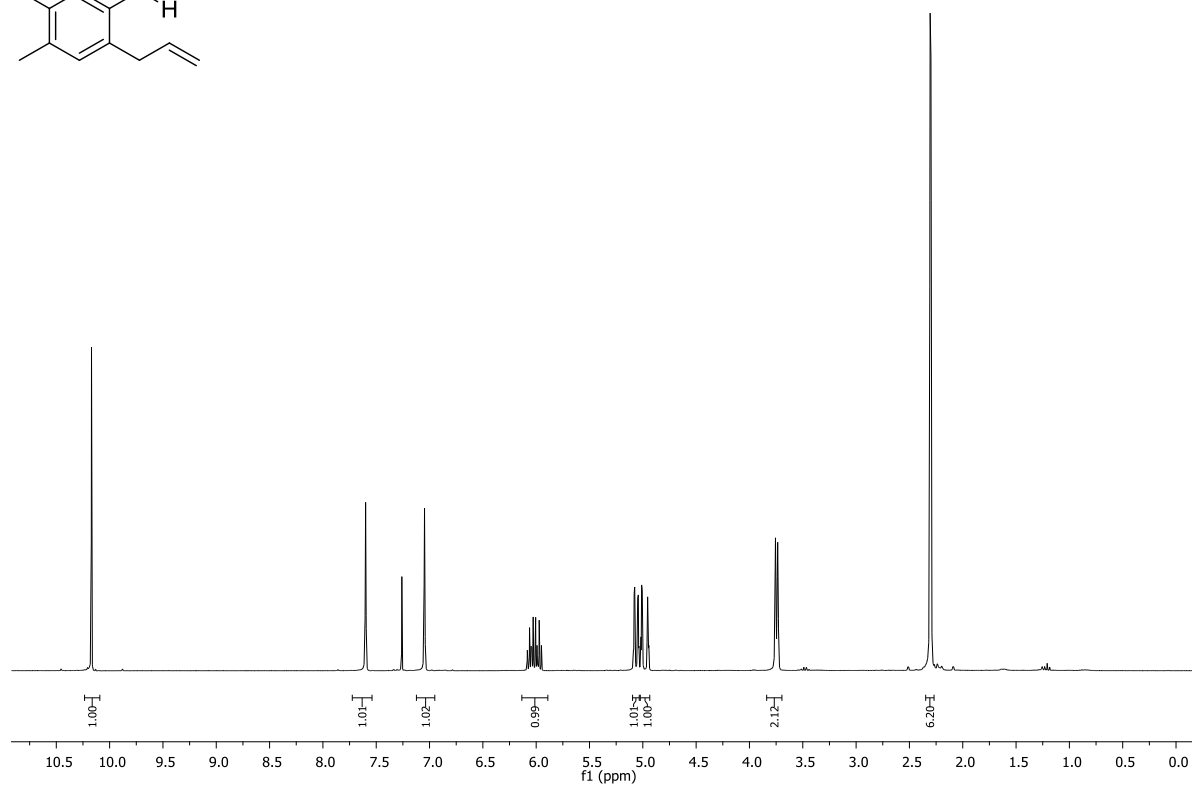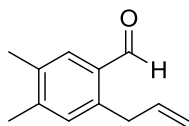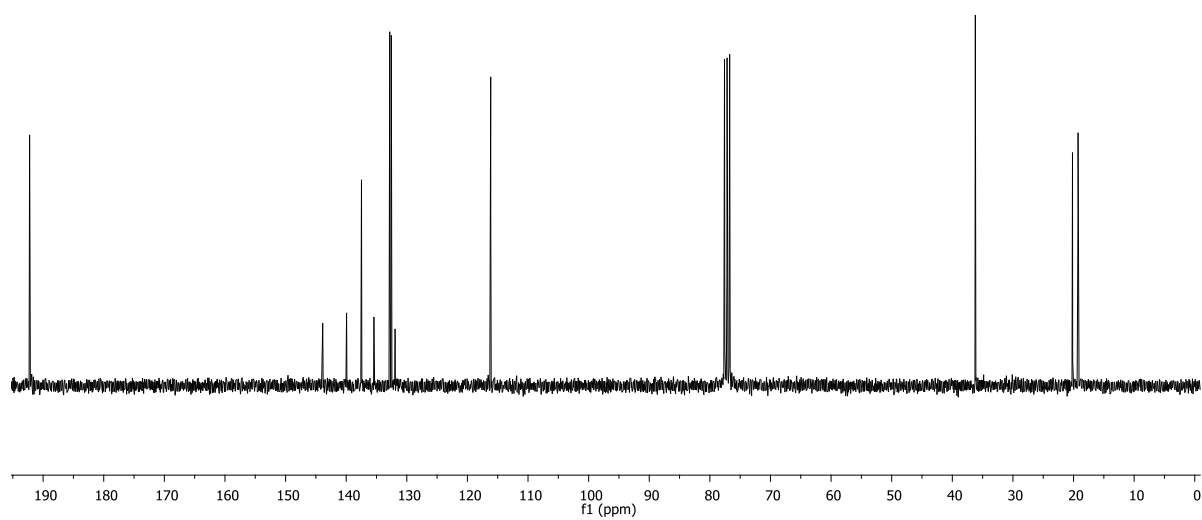

**4,5-Dimethyl-2-(2-methylallyl)benzaldehyde (12)**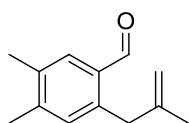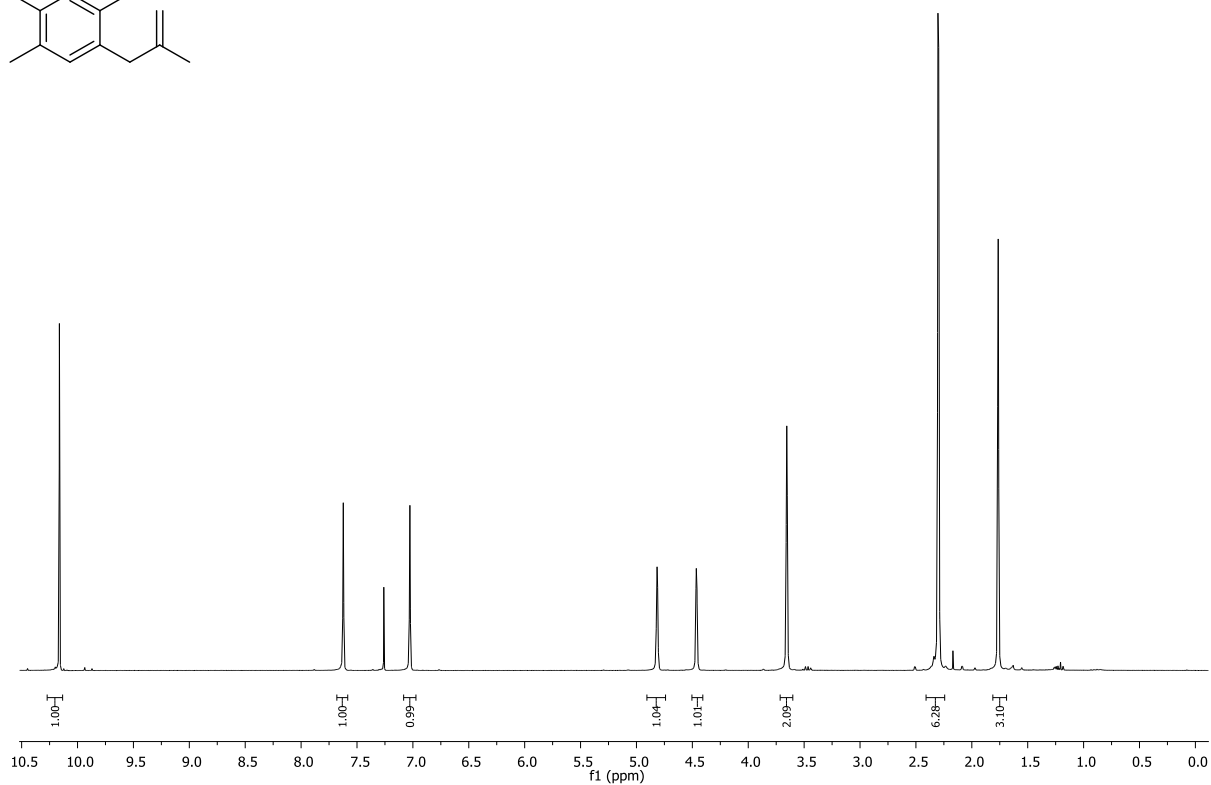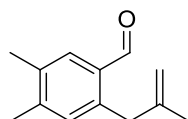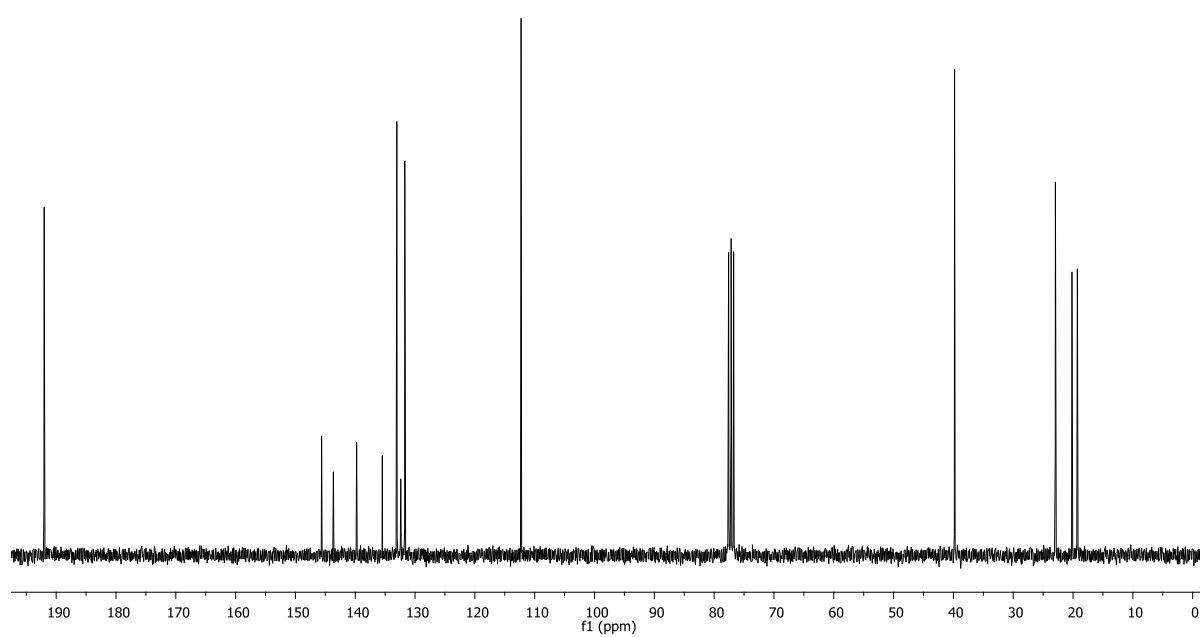

**2-(4,5-Dimethyl-2-methylenhex-4-enyl)benzaldehyde (25)**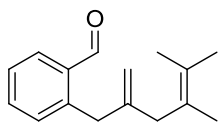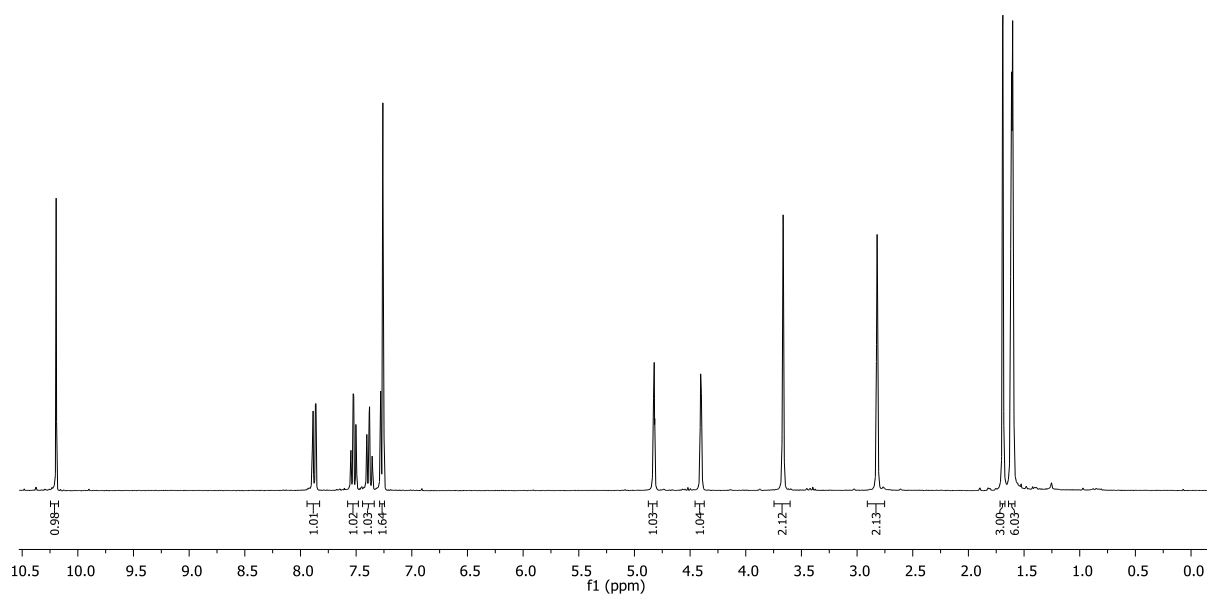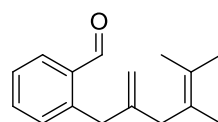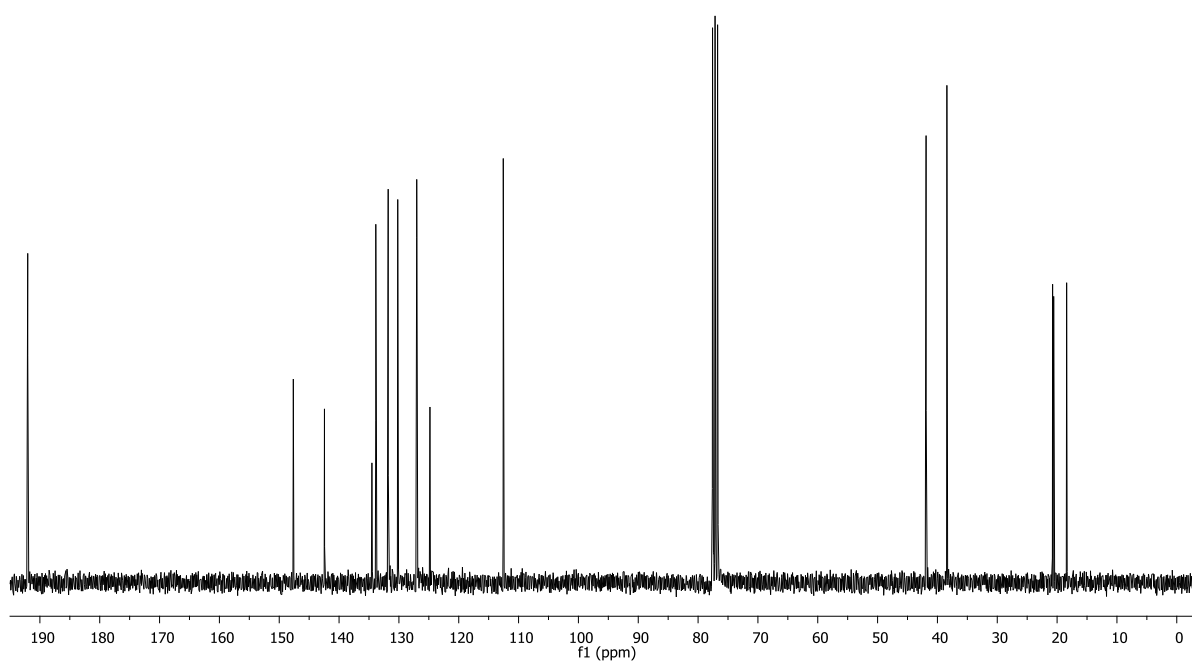

**Intermediate: 1-(2-Allyl-4,5-dimethylphenyl)but-3-en-1-ol**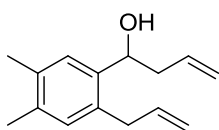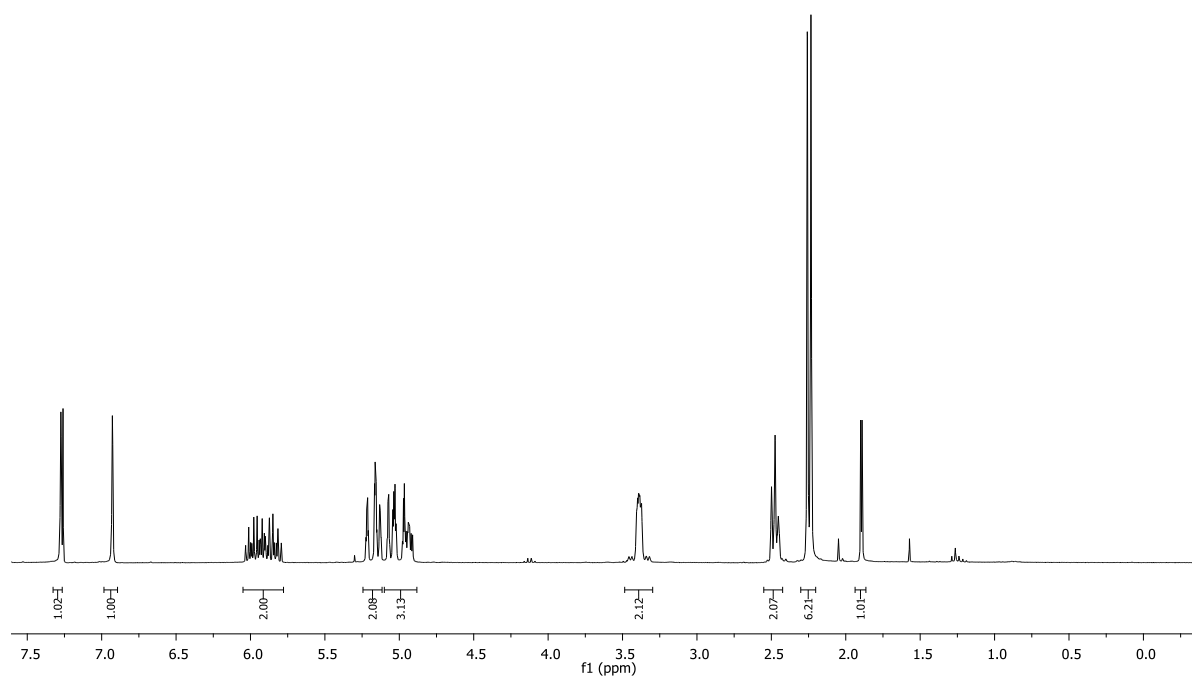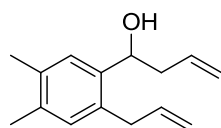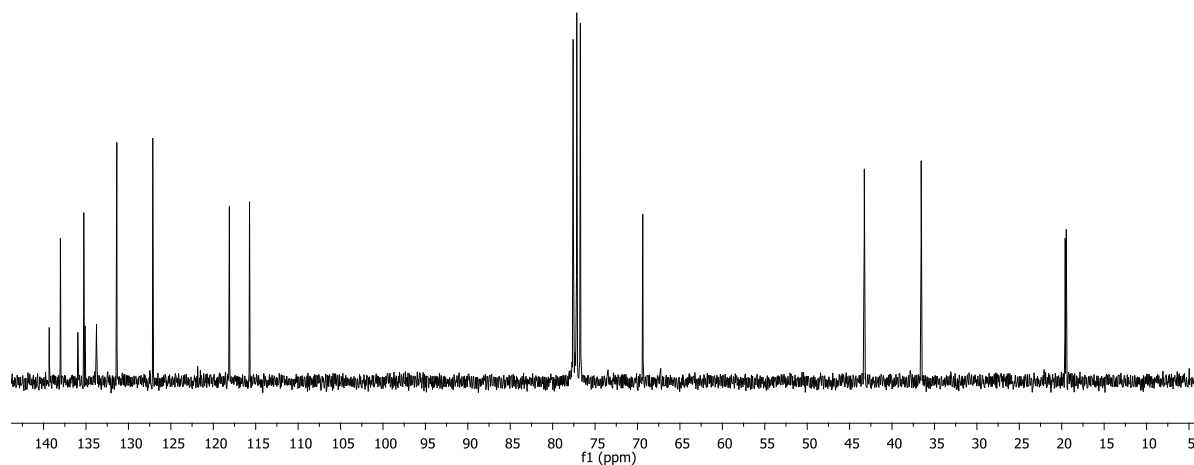

**Intermediate: 1-(4,5-Dimethyl-2-(2-methylallyl)phenyl)but-3-en-1-ol**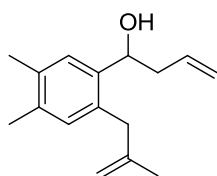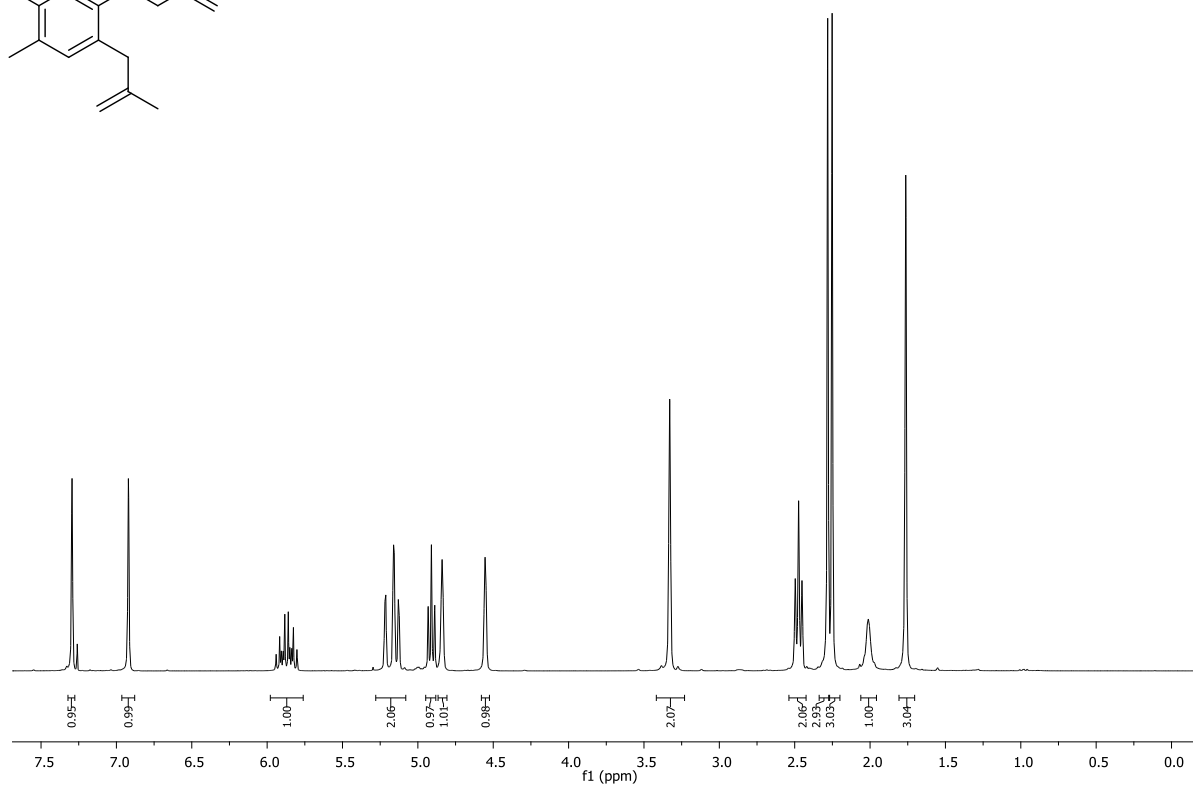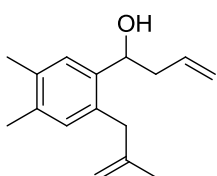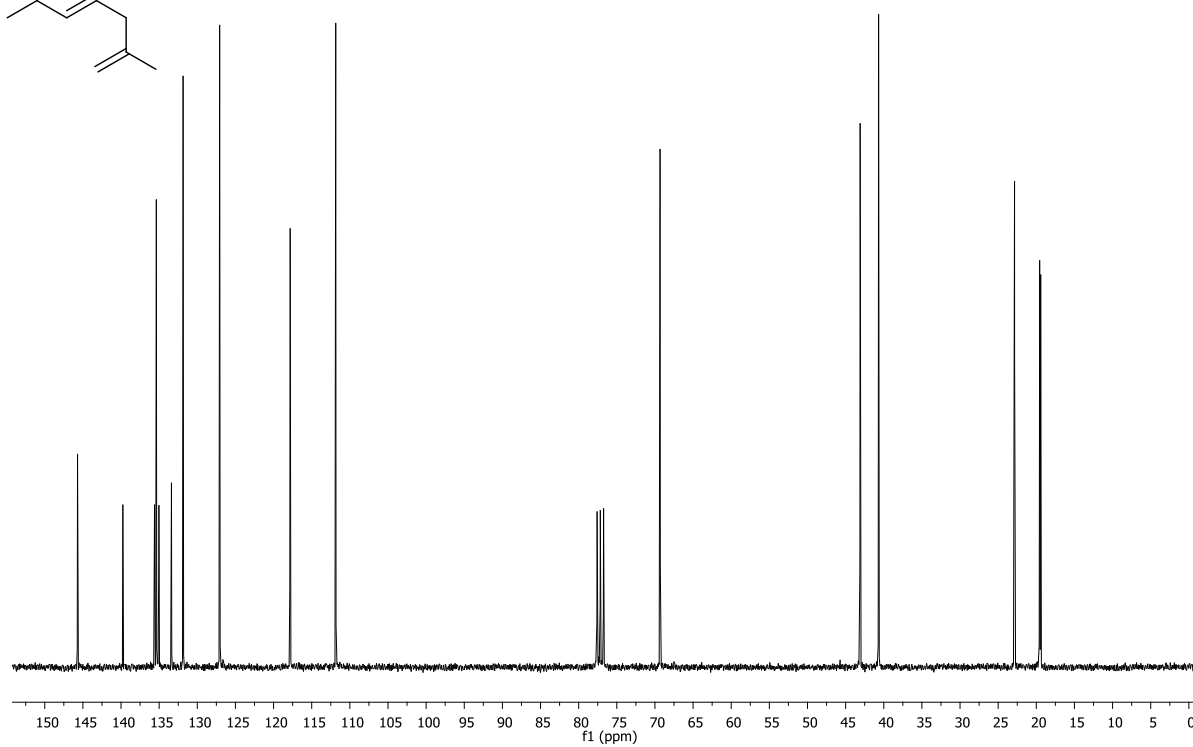

**Intermediate: 1-(2-(4,5-Dimethyl-2-methylenhex-4-enyl)-4,5-dimethylphenyl)but-3-en-1-ol**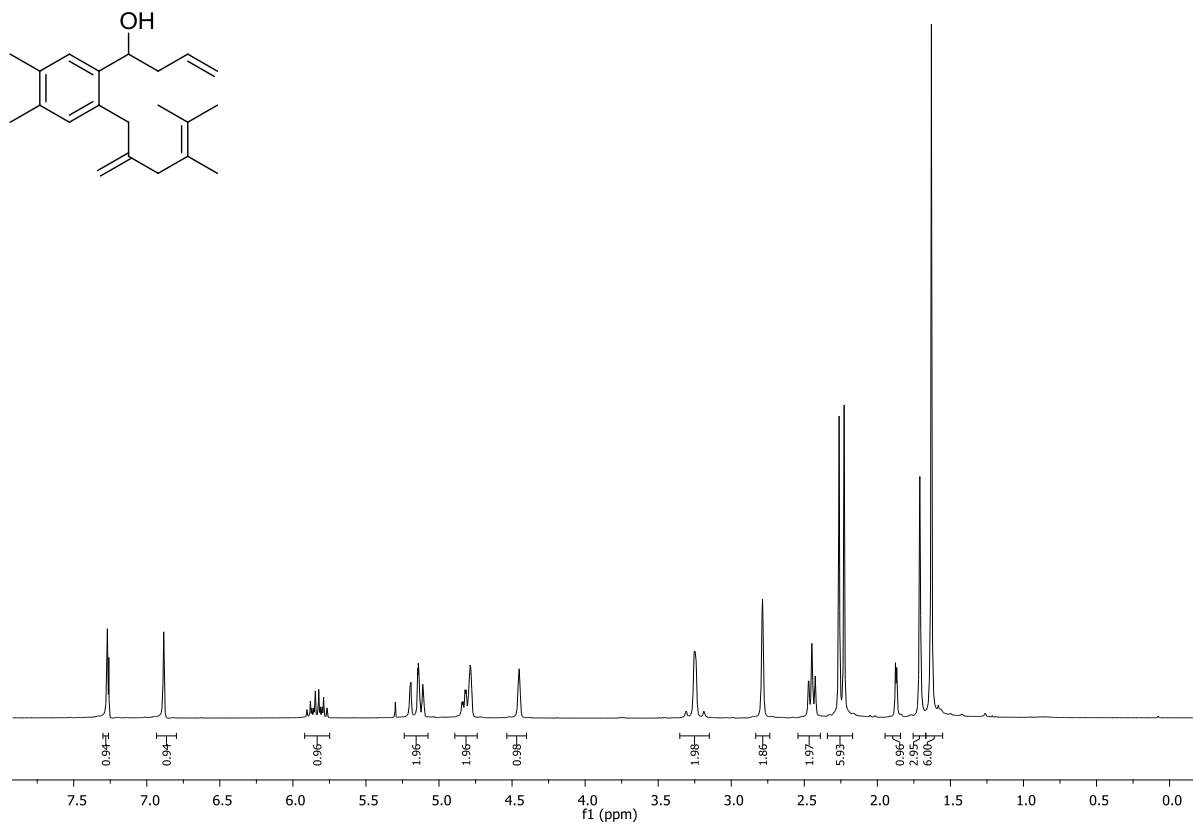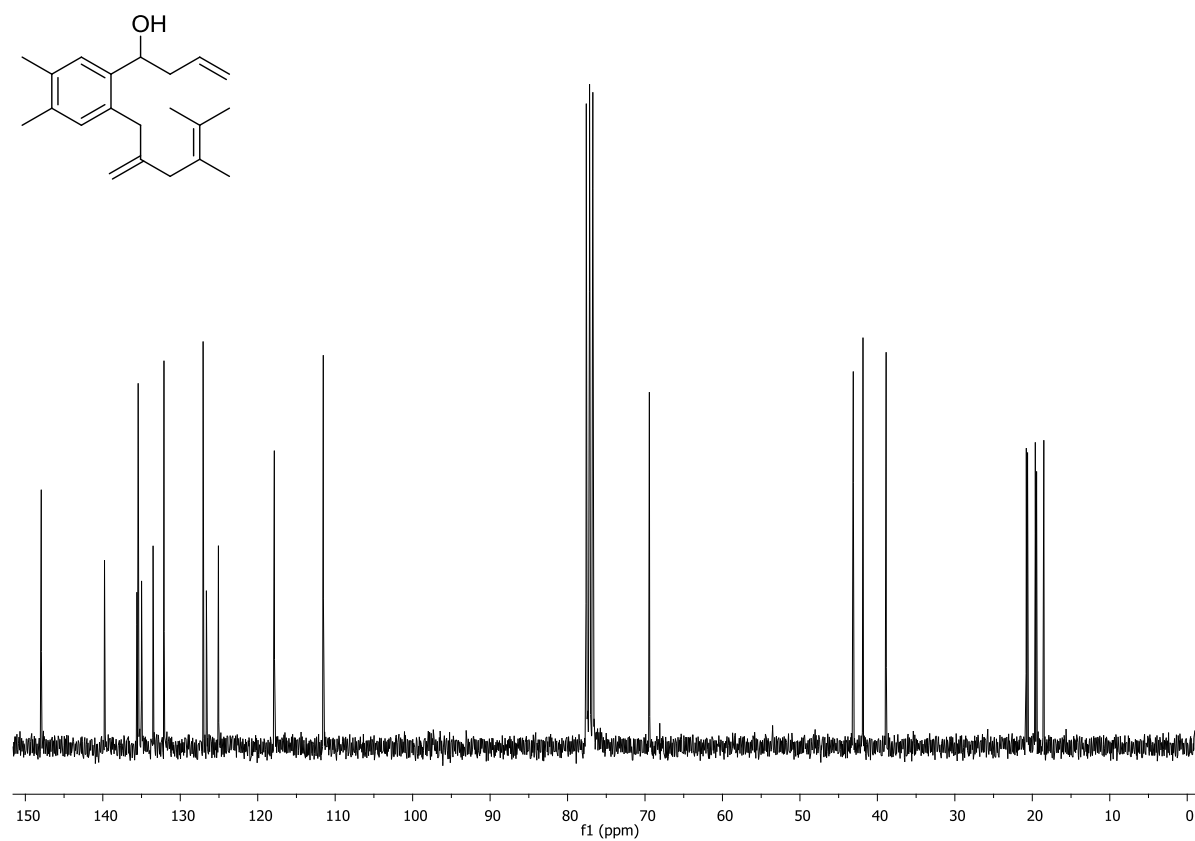



**Intermediate: 1-(2-Allyl-4,5-dimethylphenyl)-3-methylbut-3-en-1-ol**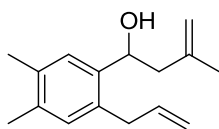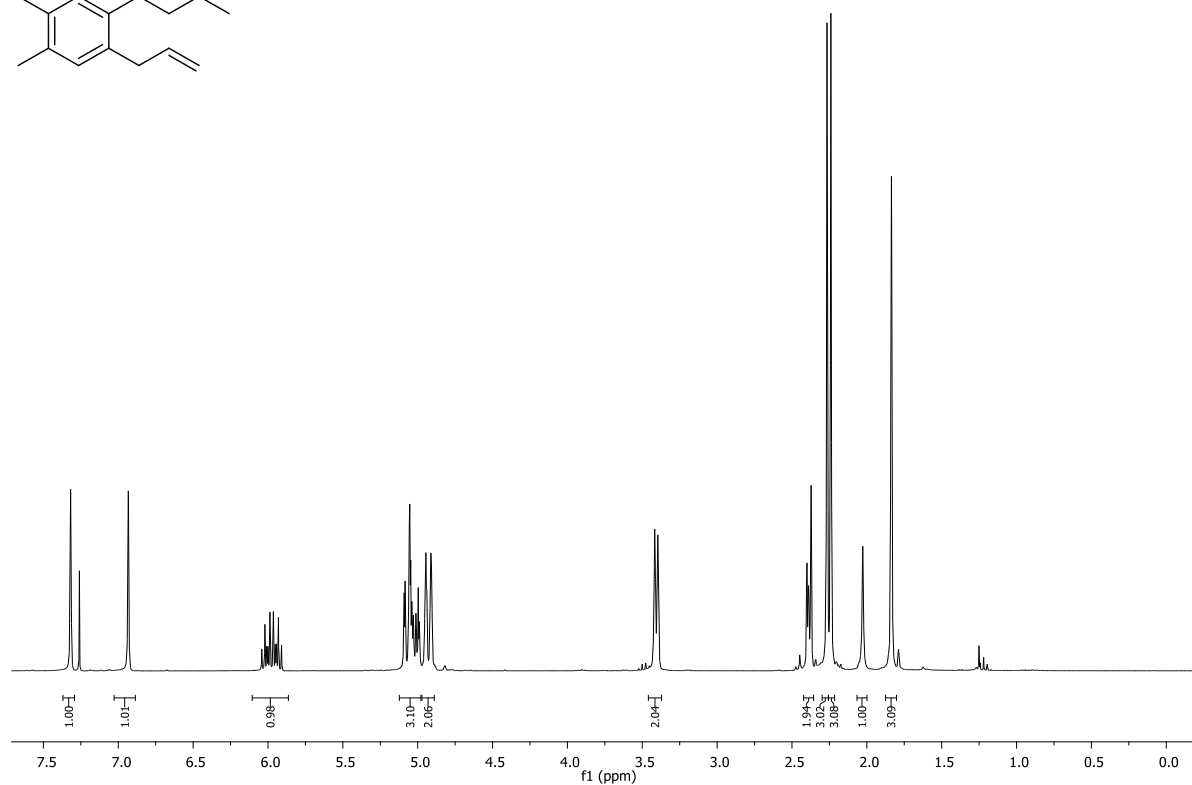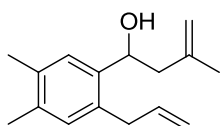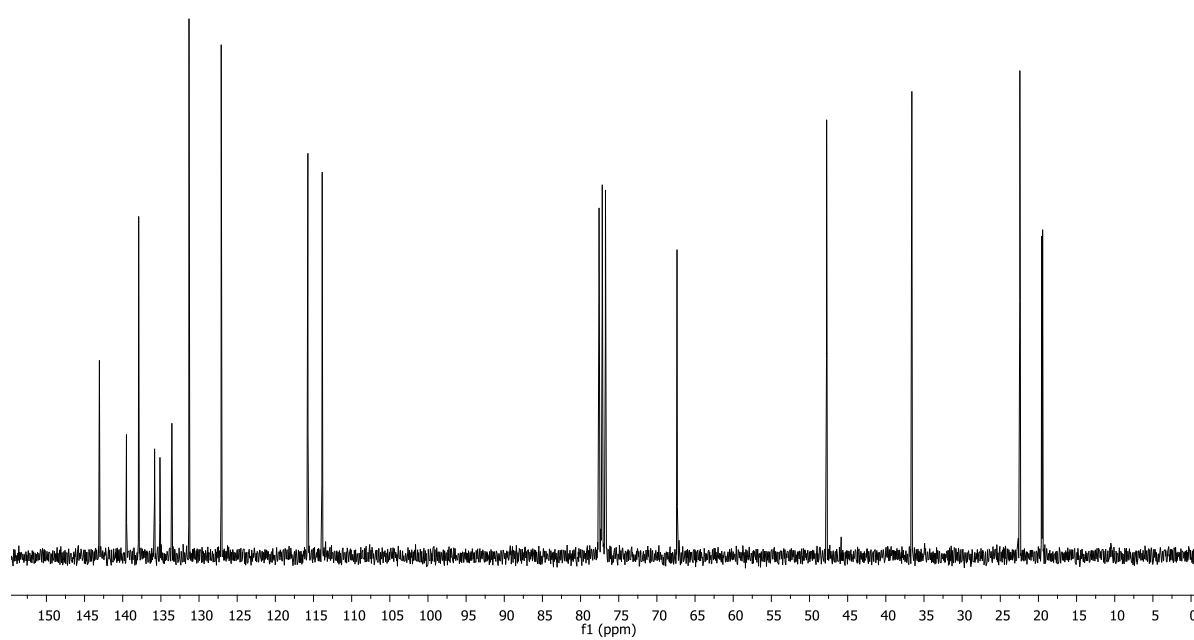

**Intermediate: 1-(4,5-Dimethyl-2-(2-methylallyl)phenyl)-3-methylbut-3-en-1-ol**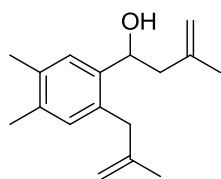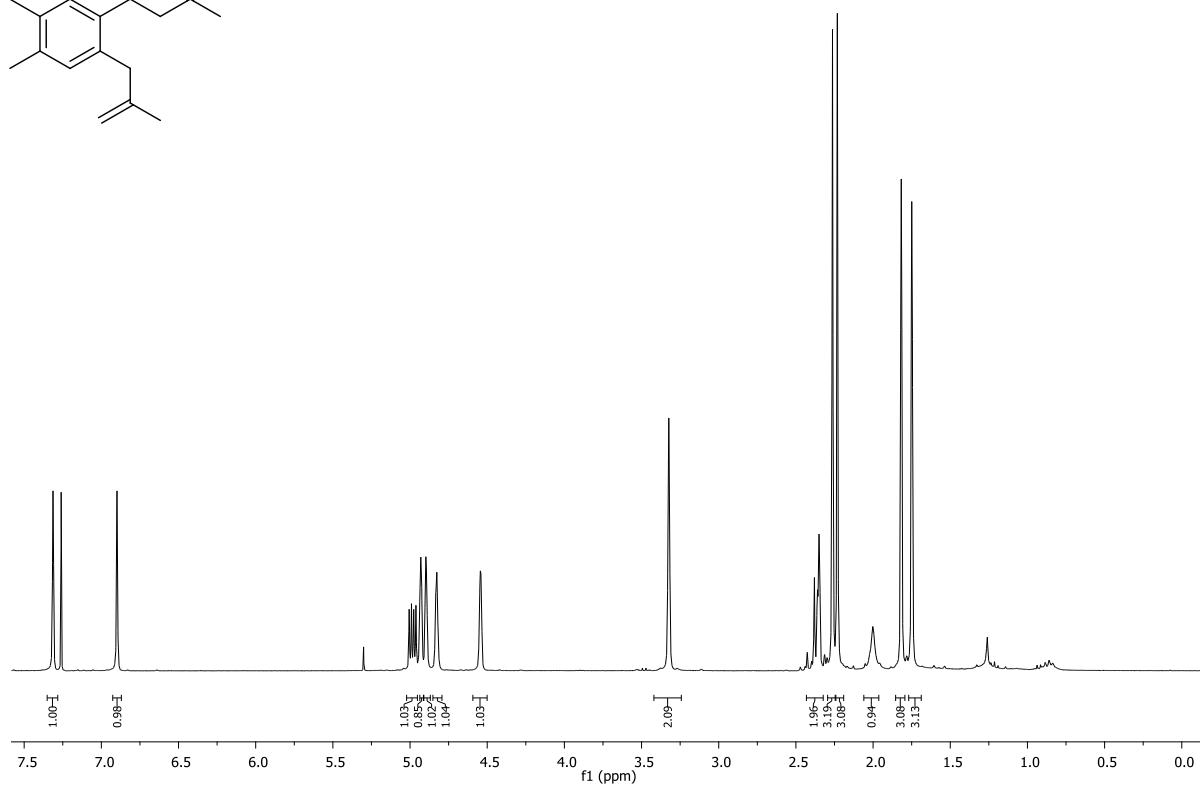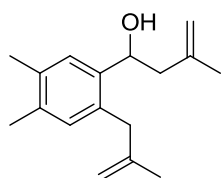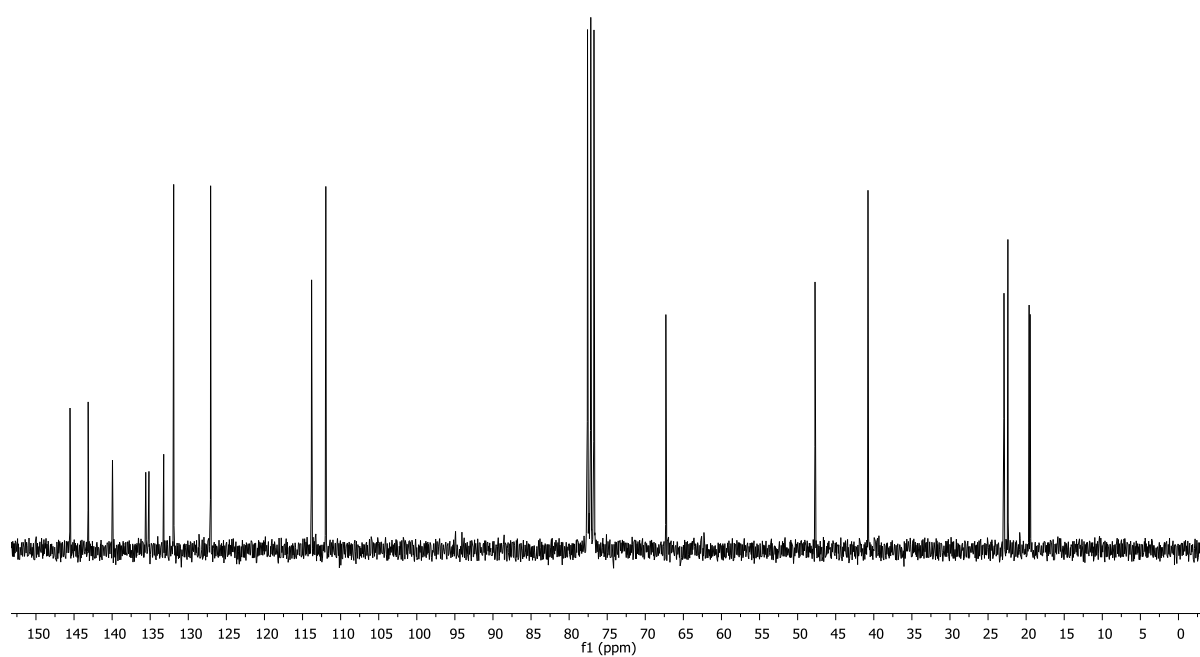

**Intermediate: 1-(2-(4,5-Dimethyl-2-methylenhex-4-enyl)-4,5-dimethylphenyl)-3-methylbut-3-en-1-ol**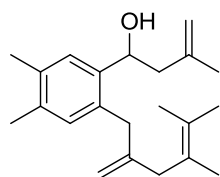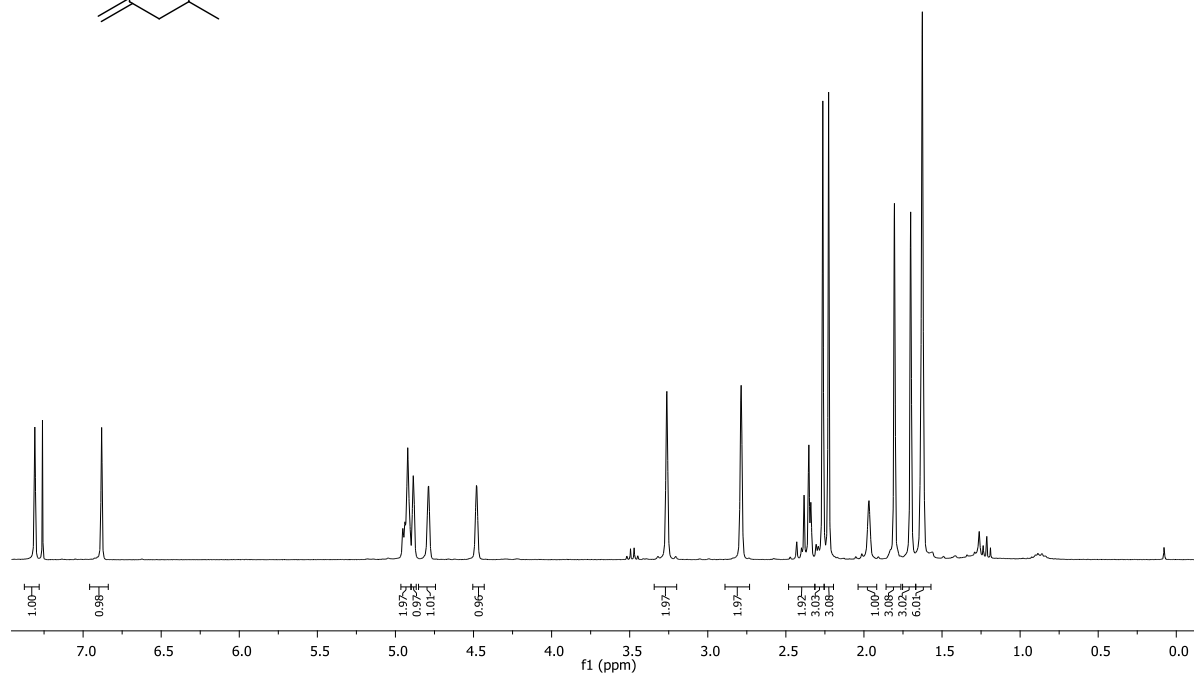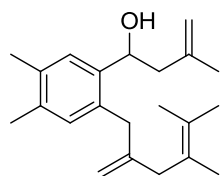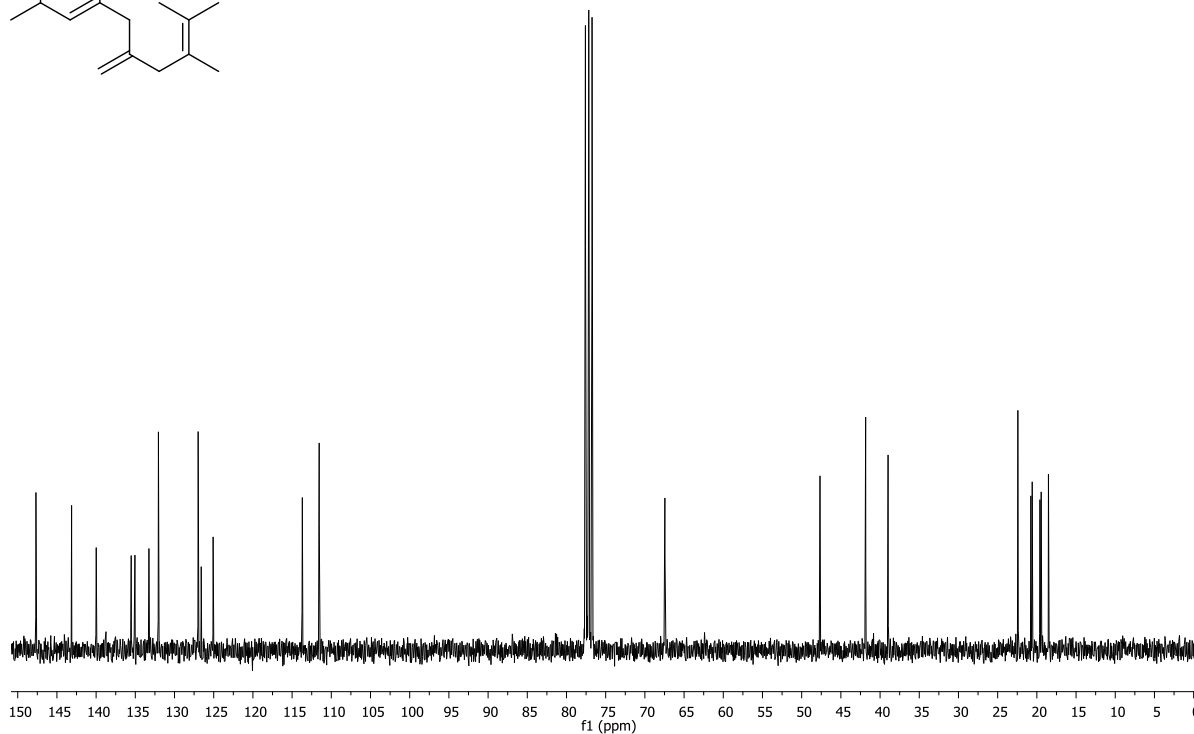

**Intermediate: 1-(4,5-Dimethyl-2-(2-methylallyl)phenyl)-5,6-dimethyl-3-methylenhept-5-en-1-ol**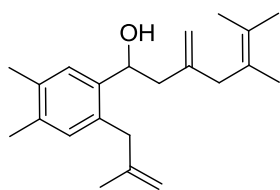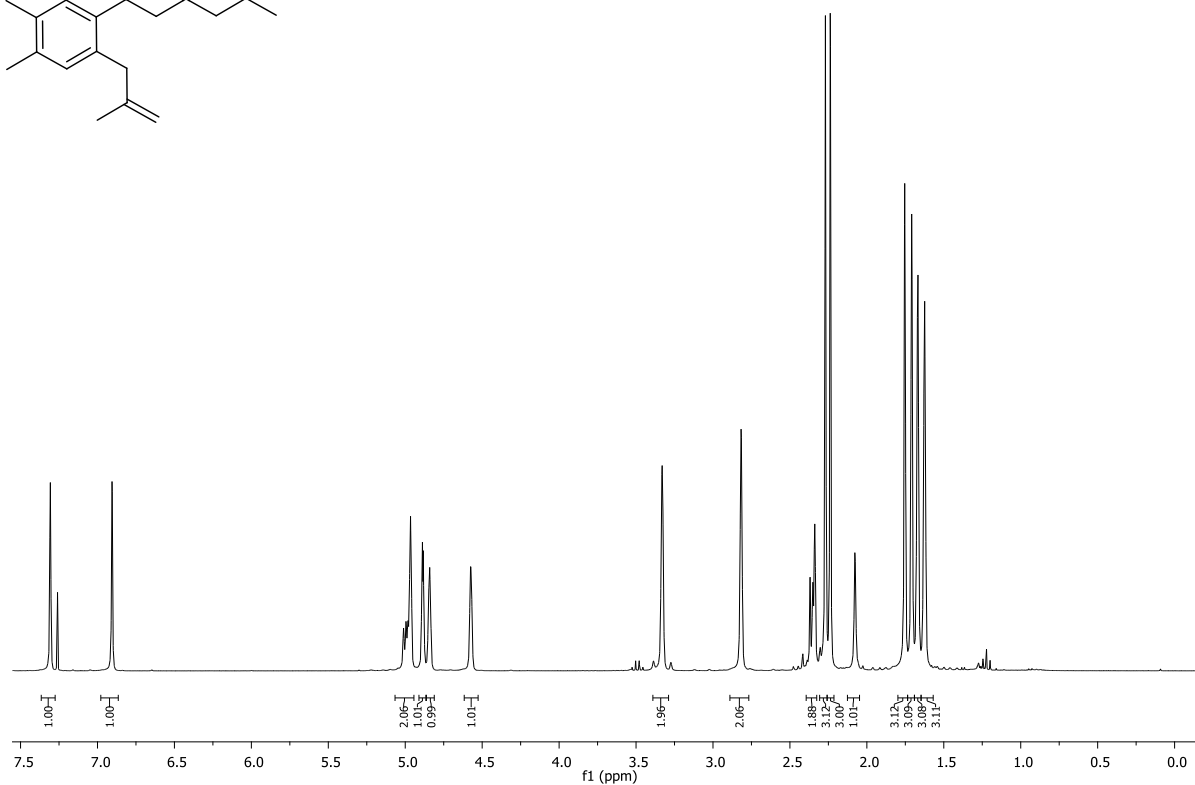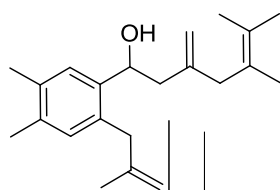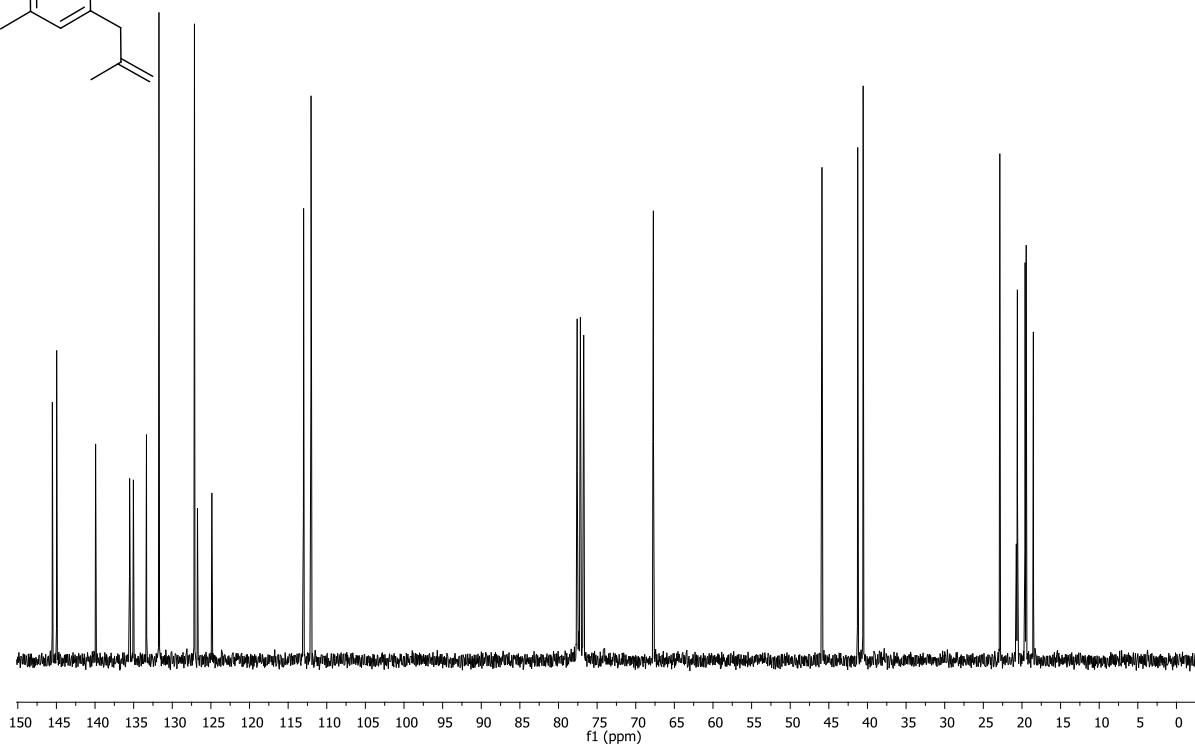

**Intermediate: 1-(2-(4,5-Dimethyl-2-methylenhex-4-enyl)-4,5-dimethylphenyl)-5,6-dimethyl-3-methylenhept-5-en-1-ol**

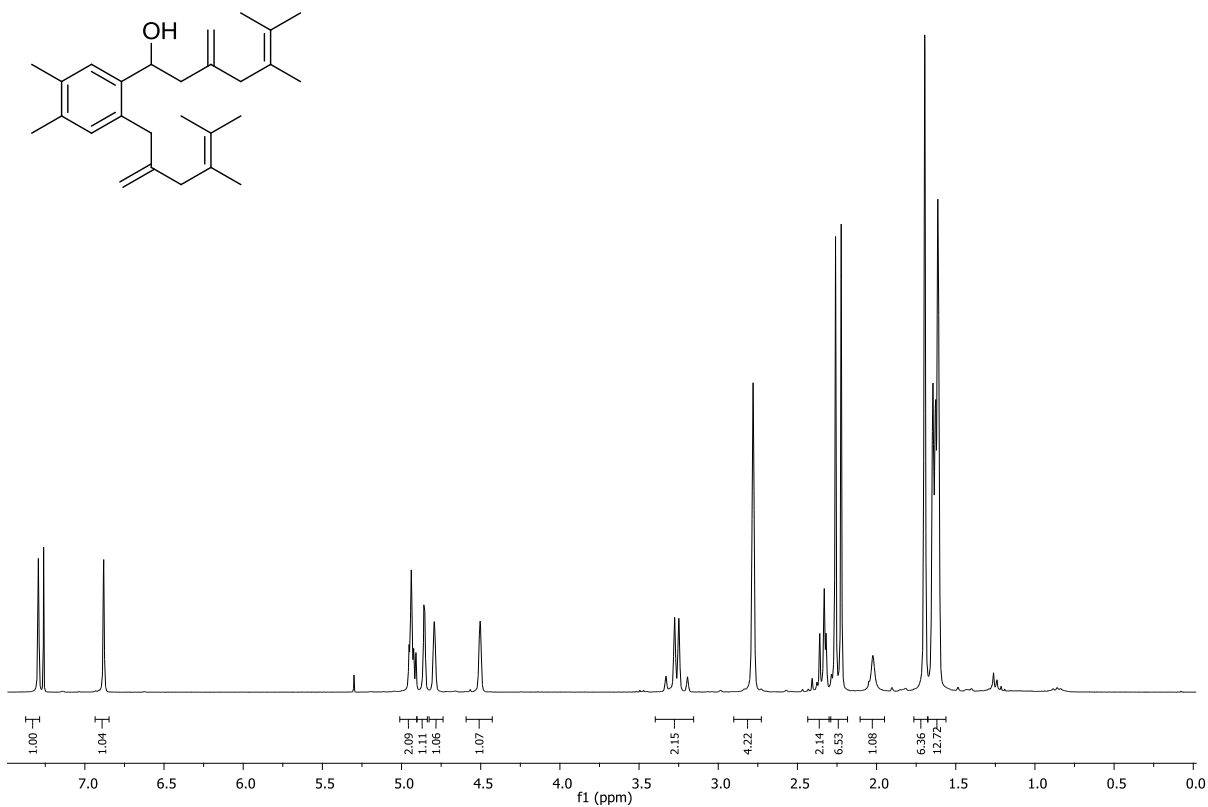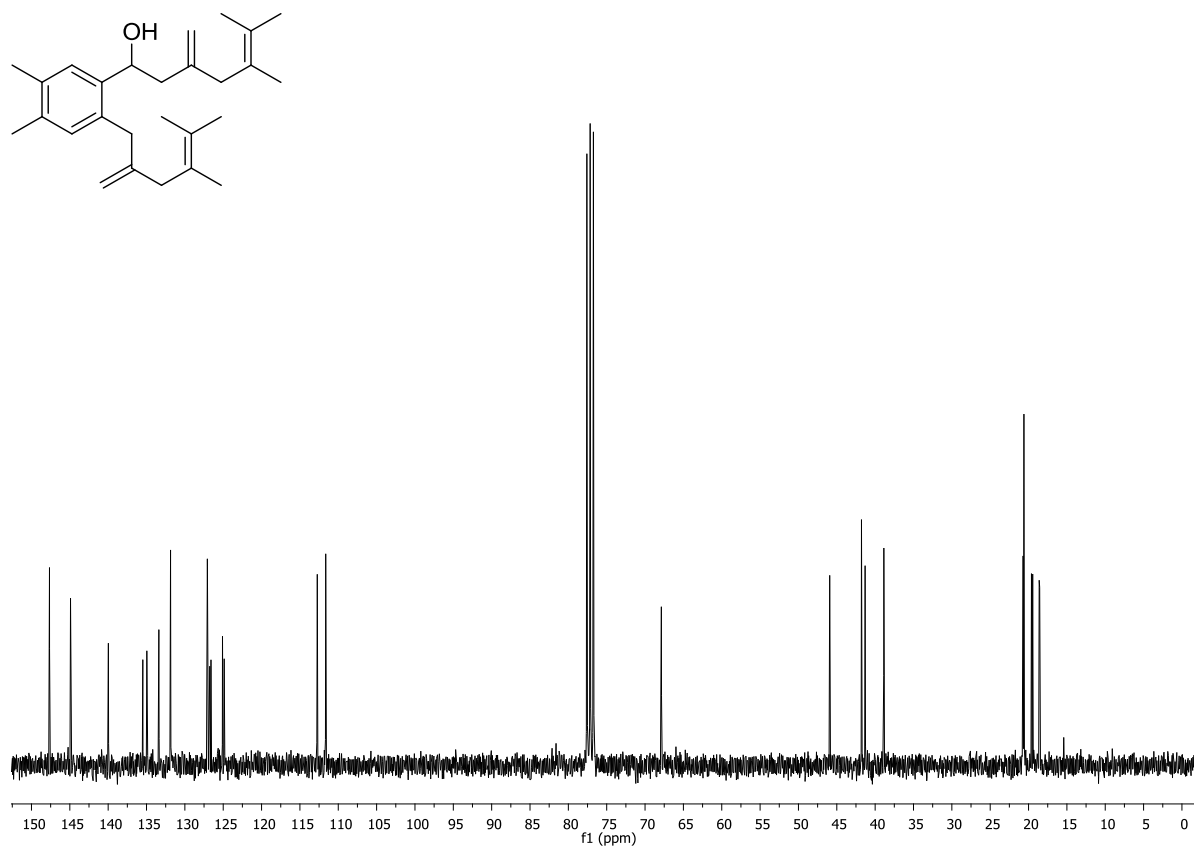

**1-(2-(4,5-Dimethyl-2-methylenehex-4-enyl)-4-methylphenyl)-5,6-dimethyl-3-methylenhept-5-en-1-ol (50)**

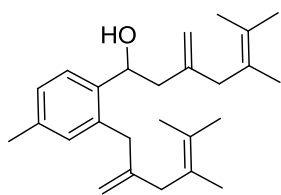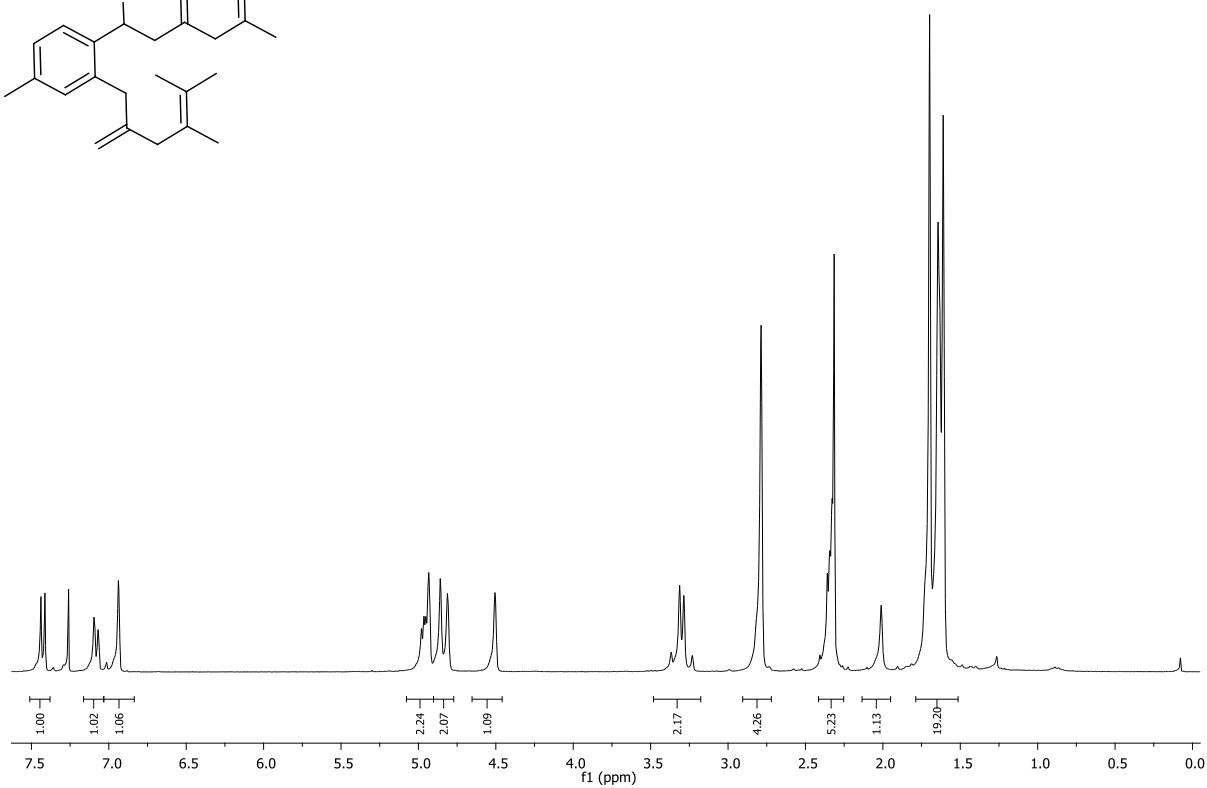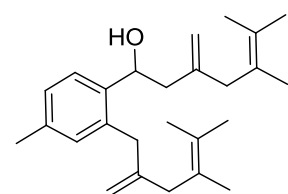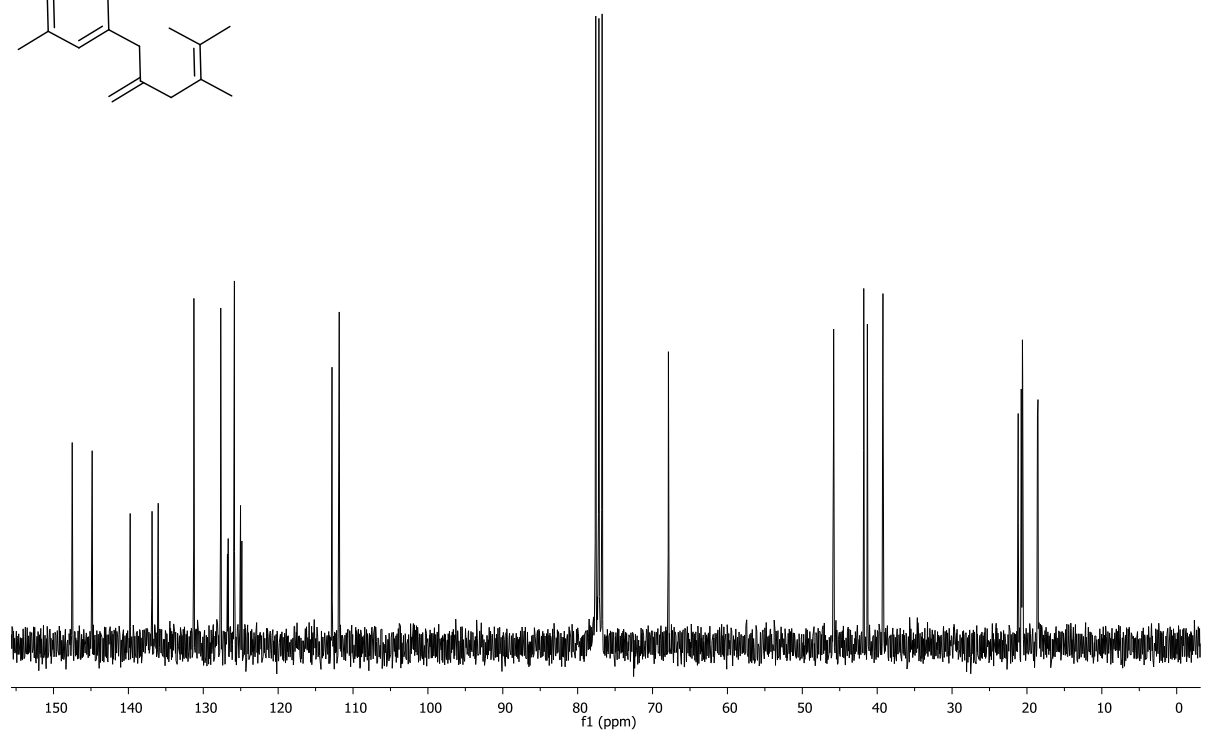

**1-(2-Allyl-4,5-dimethylphenyl)but-3-en-1-one (16)**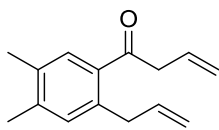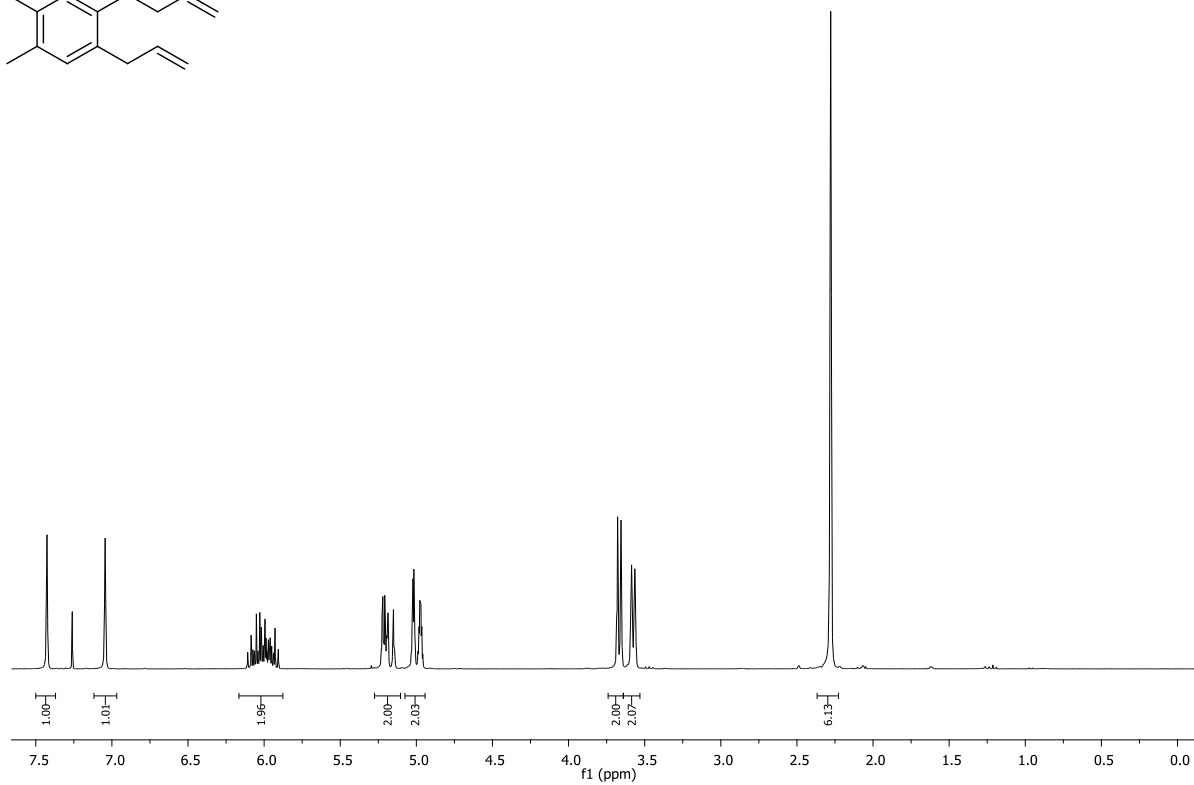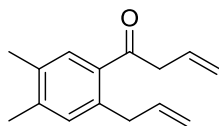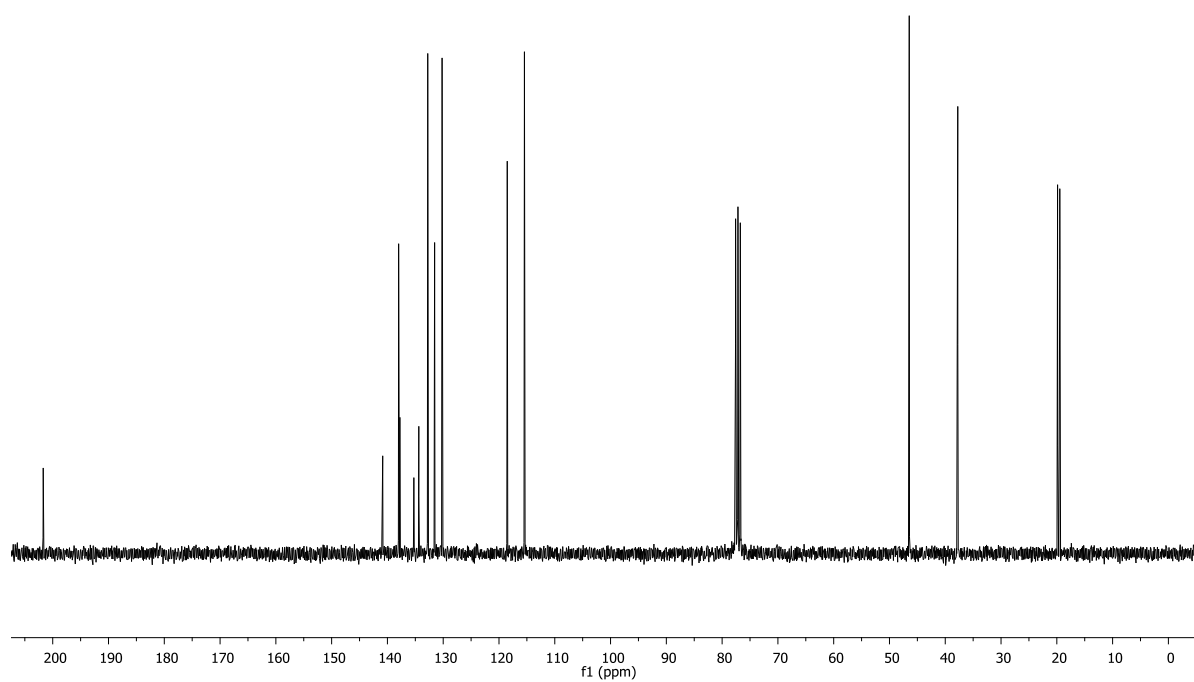

**1-(2-Allyl-4,5-dimethylphenyl)-3-methylbut-3-en-1-one (19)**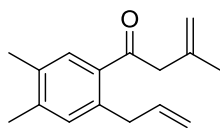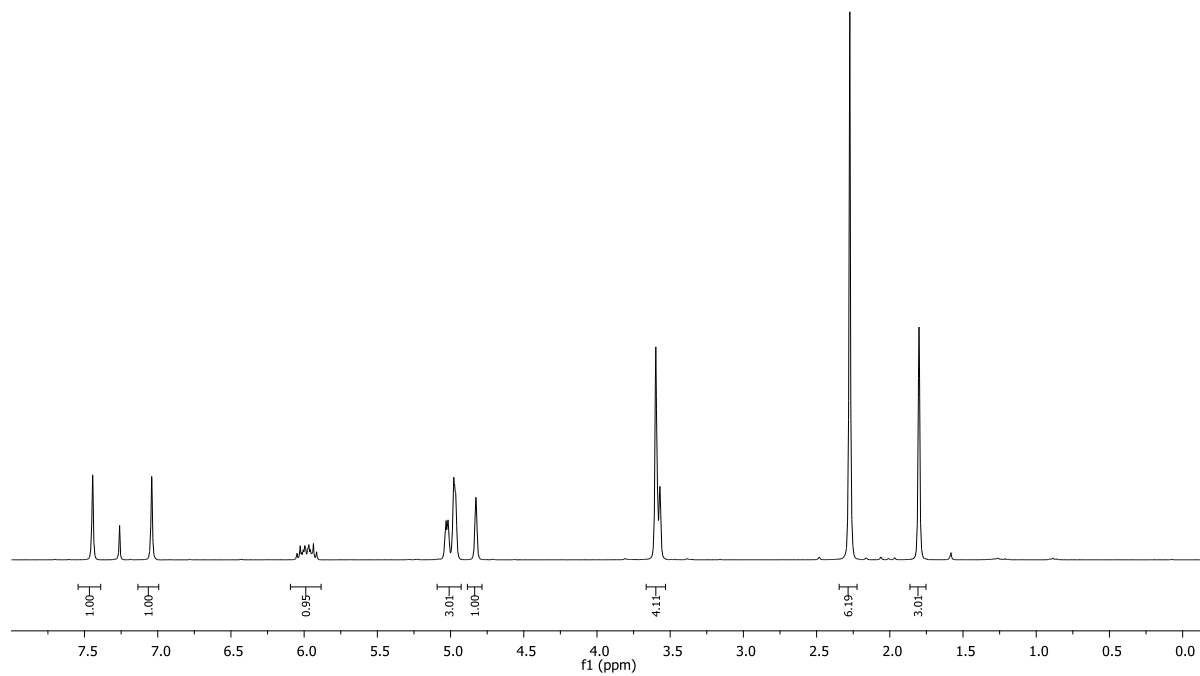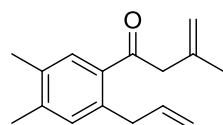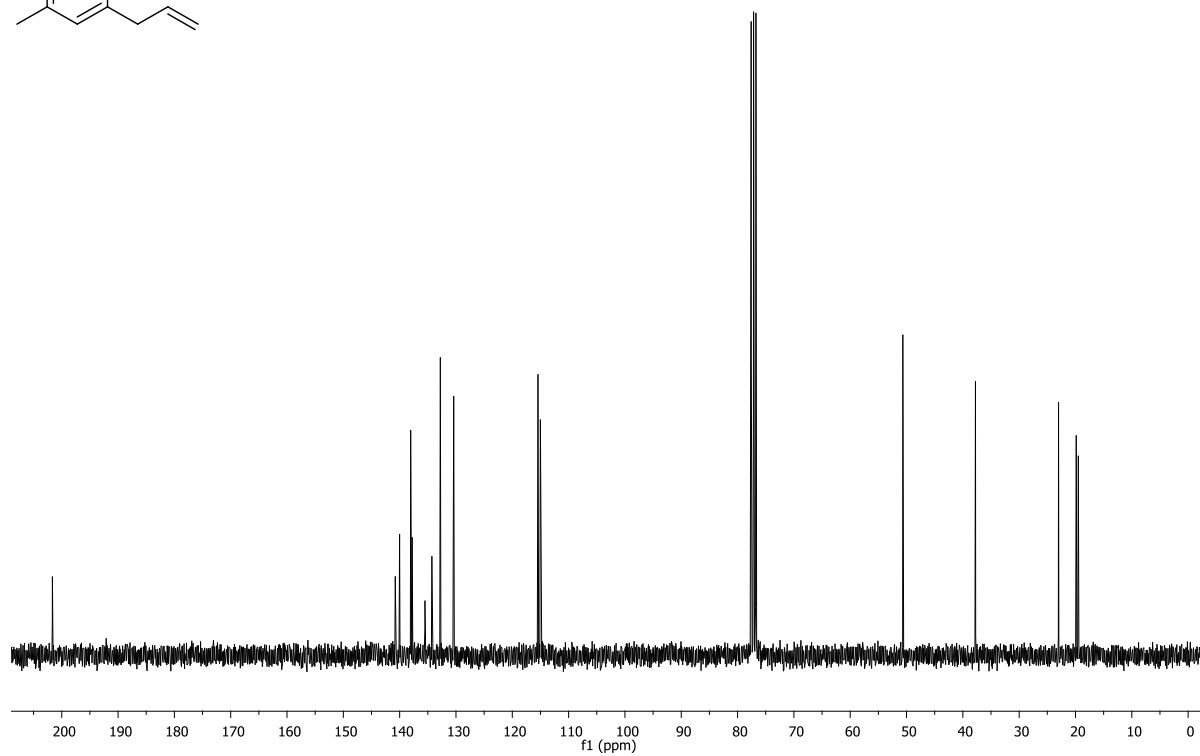



**1-(4,5-Dimethyl-2-(2-methylallyl)phenyl)-3-methylbut-3-en-1-one (20)**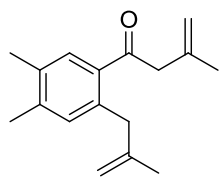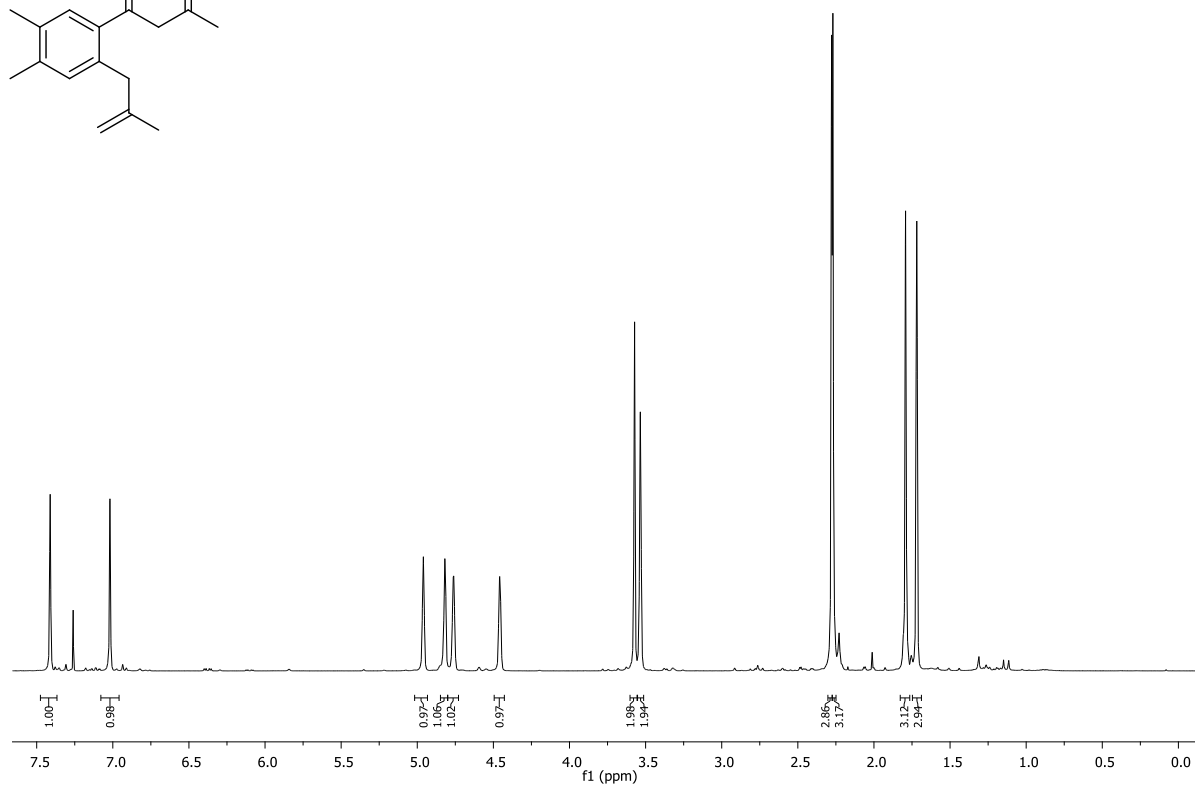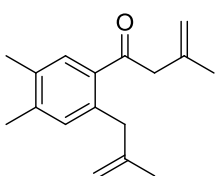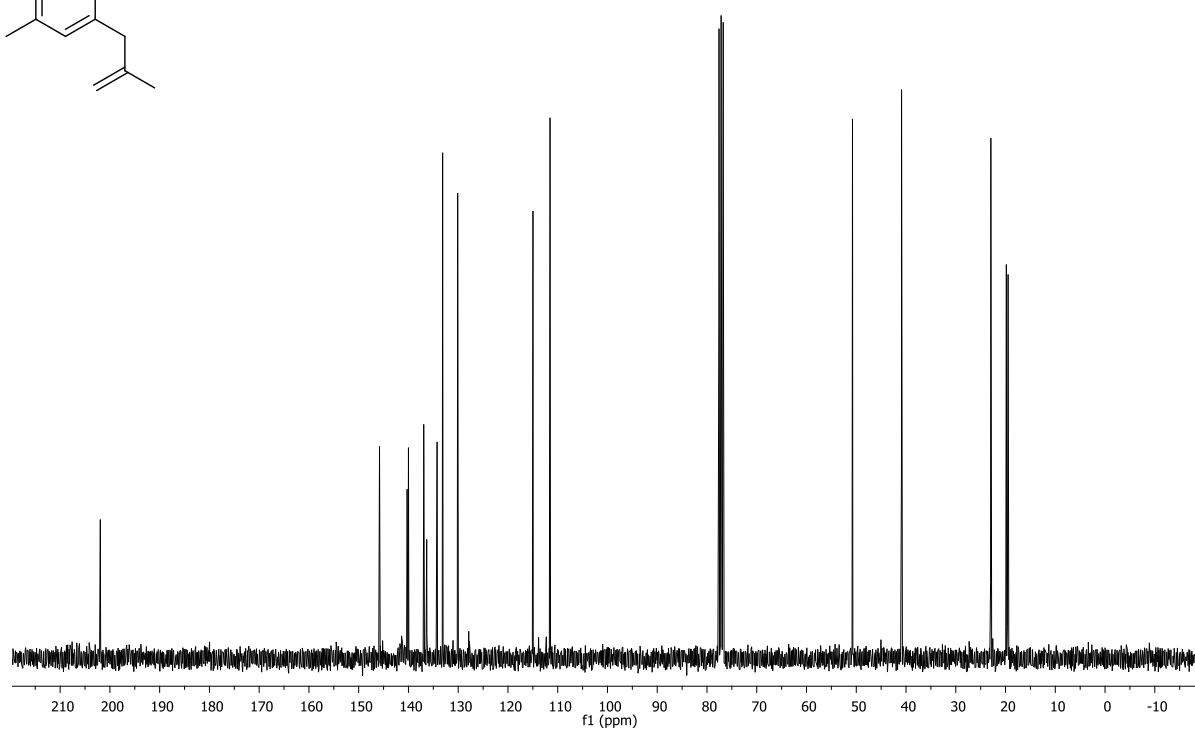

**1-(4,5-Dimethyl-2-(2-methylallyl)phenyl)but-3-en-1-one (17)**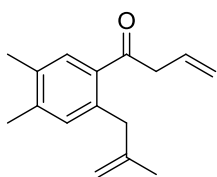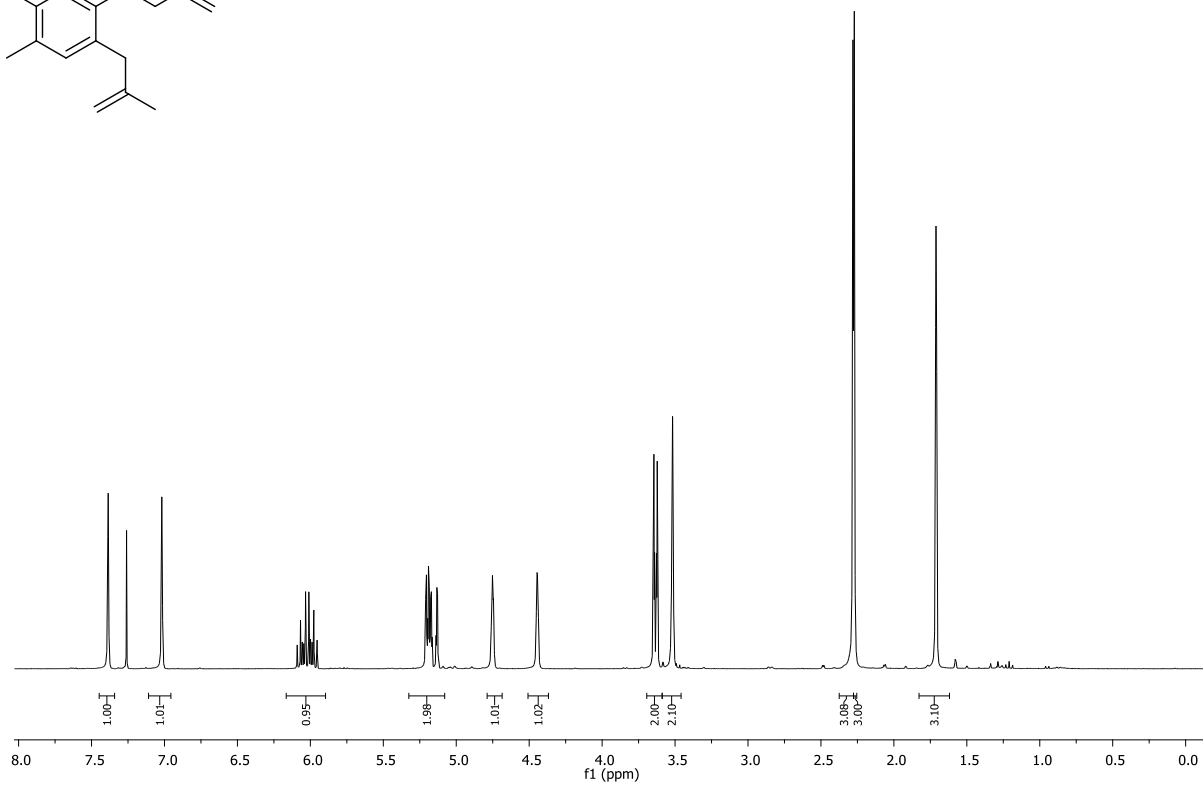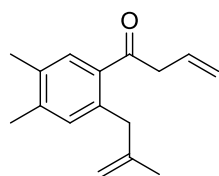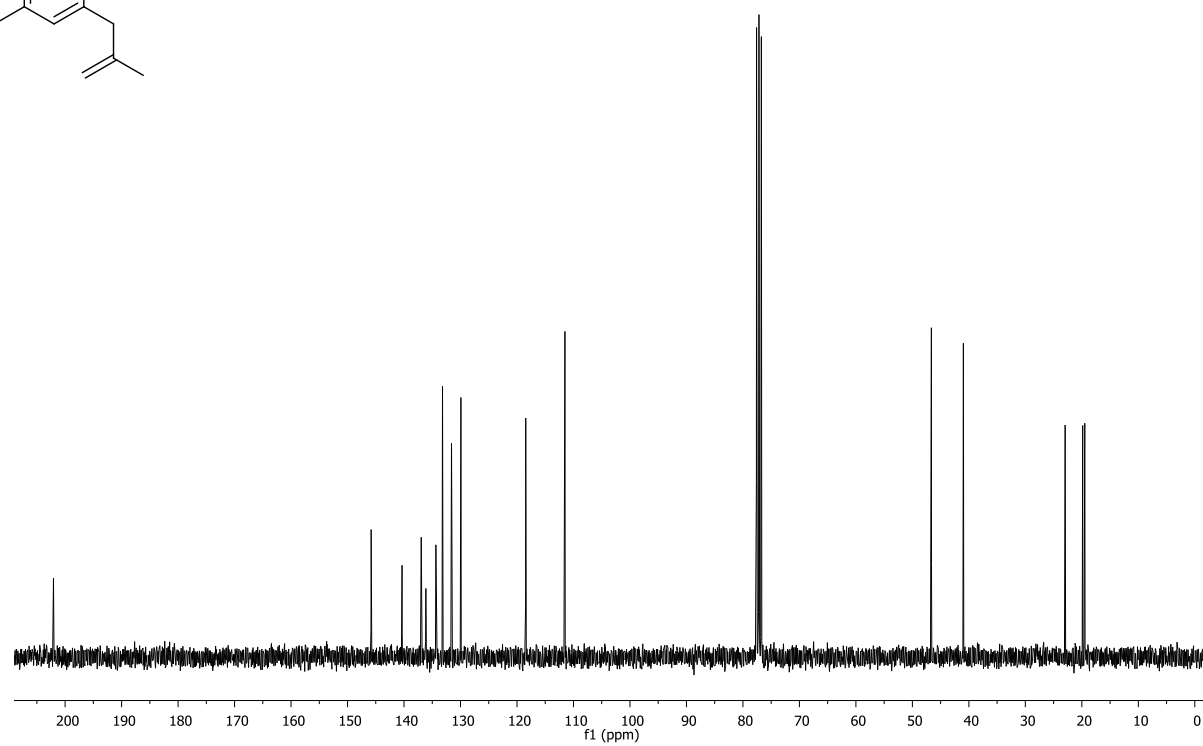

**1-(4,5-Dimethyl-2-(2-methylallyl)phenyl)-5,6-dimethyl-3-methylenehept-5-en-1-one (22)**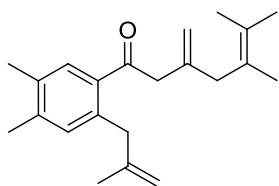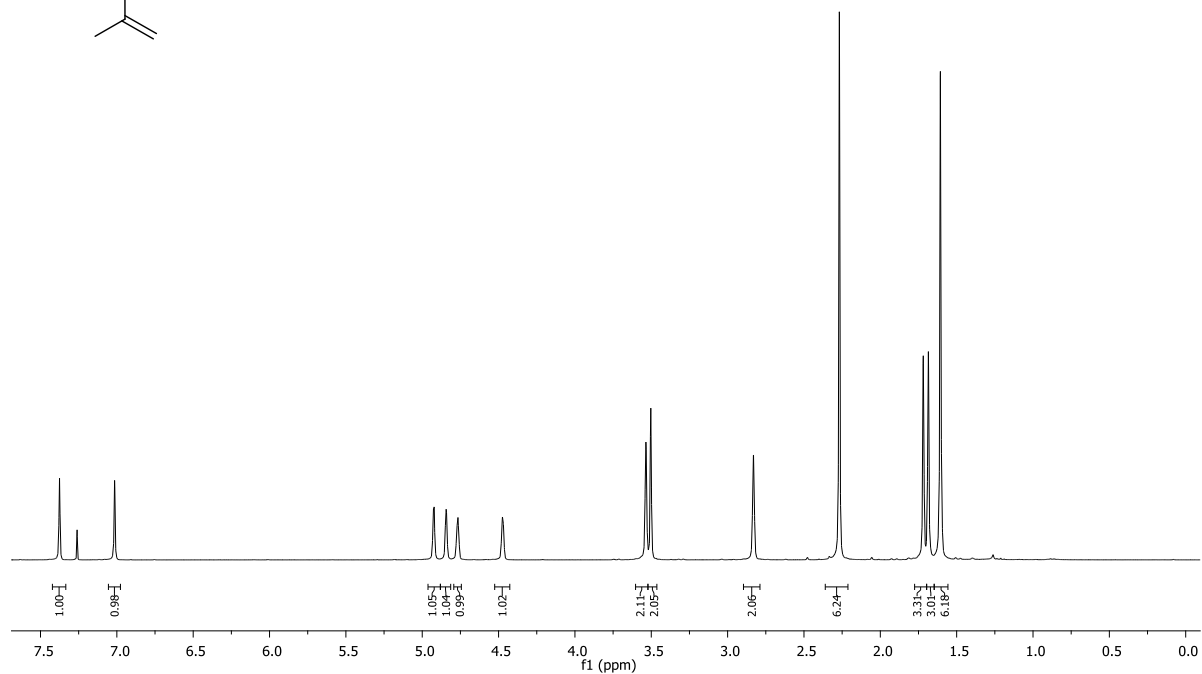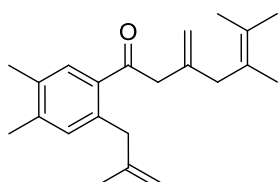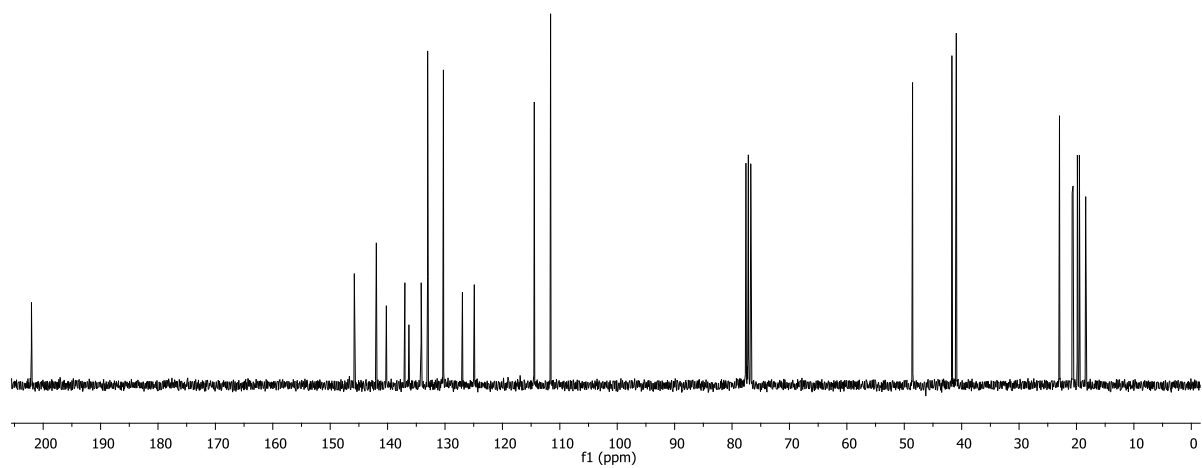

**1-(2-(4,5-Dimethyl-2-methylenhex-4-enyl)-4,5-dimethylphenyl)but-3-en-1-one (18)**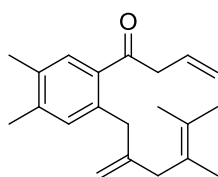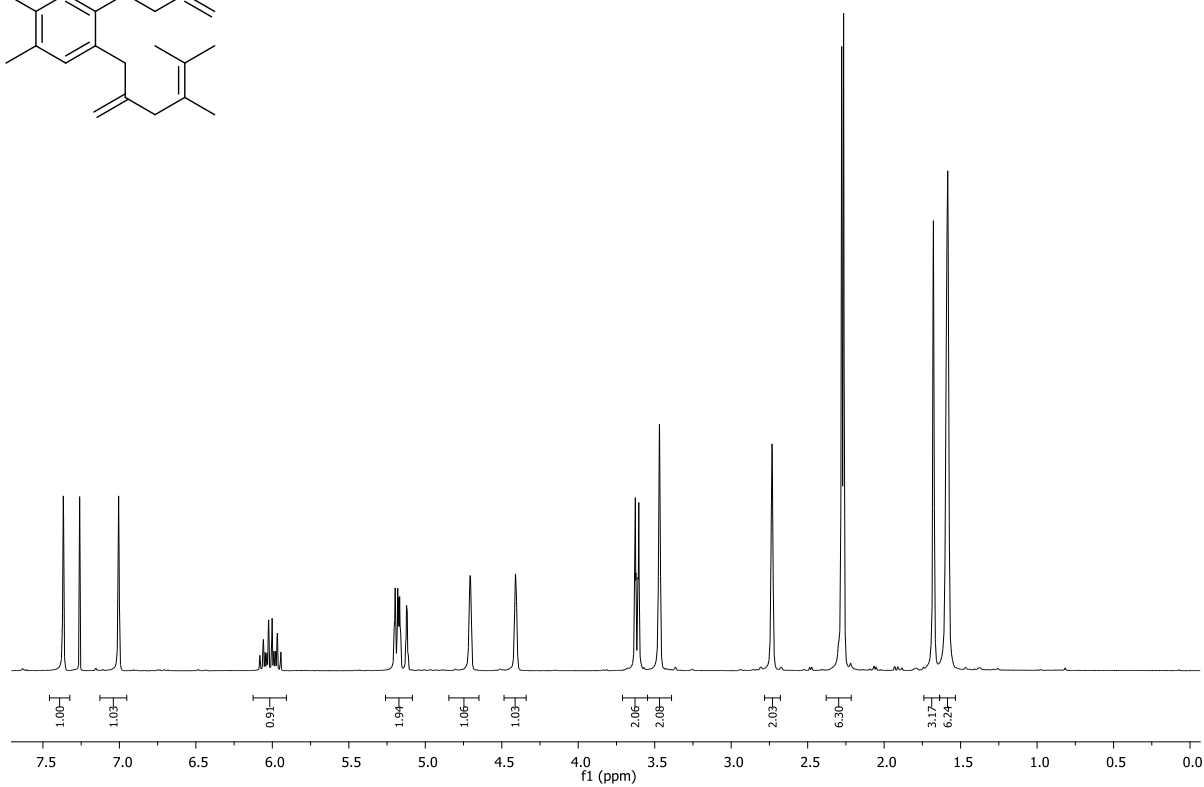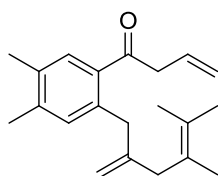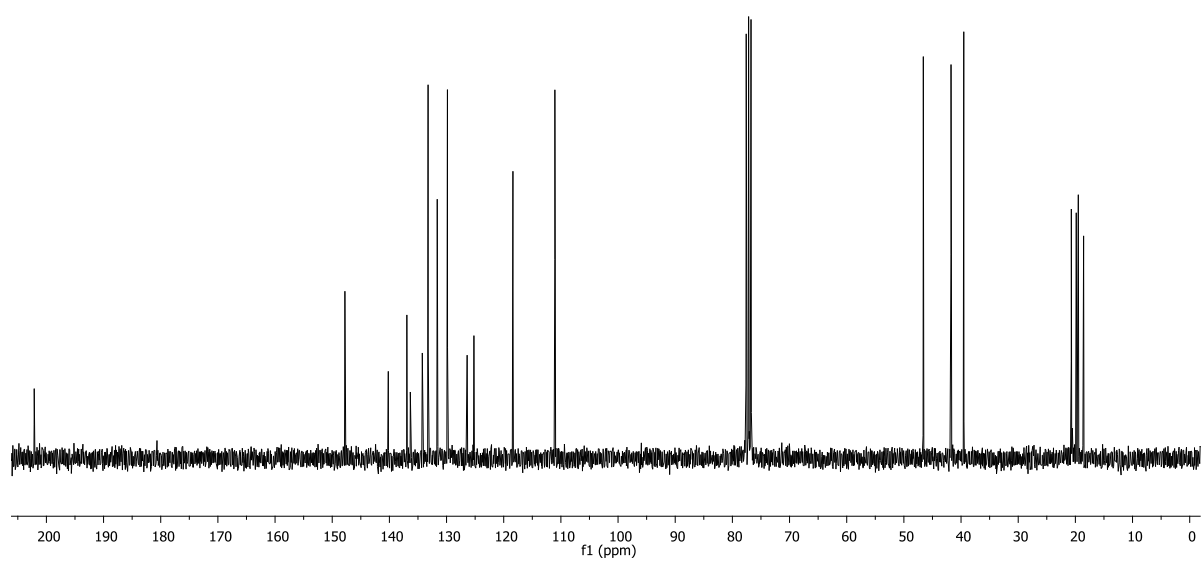

**1-(2-(4,5-Dimethyl-2-methylenhex-4-enyl)-4,5-dimethylphenyl)-3-methylbut-3-en-1-one (21)**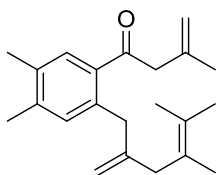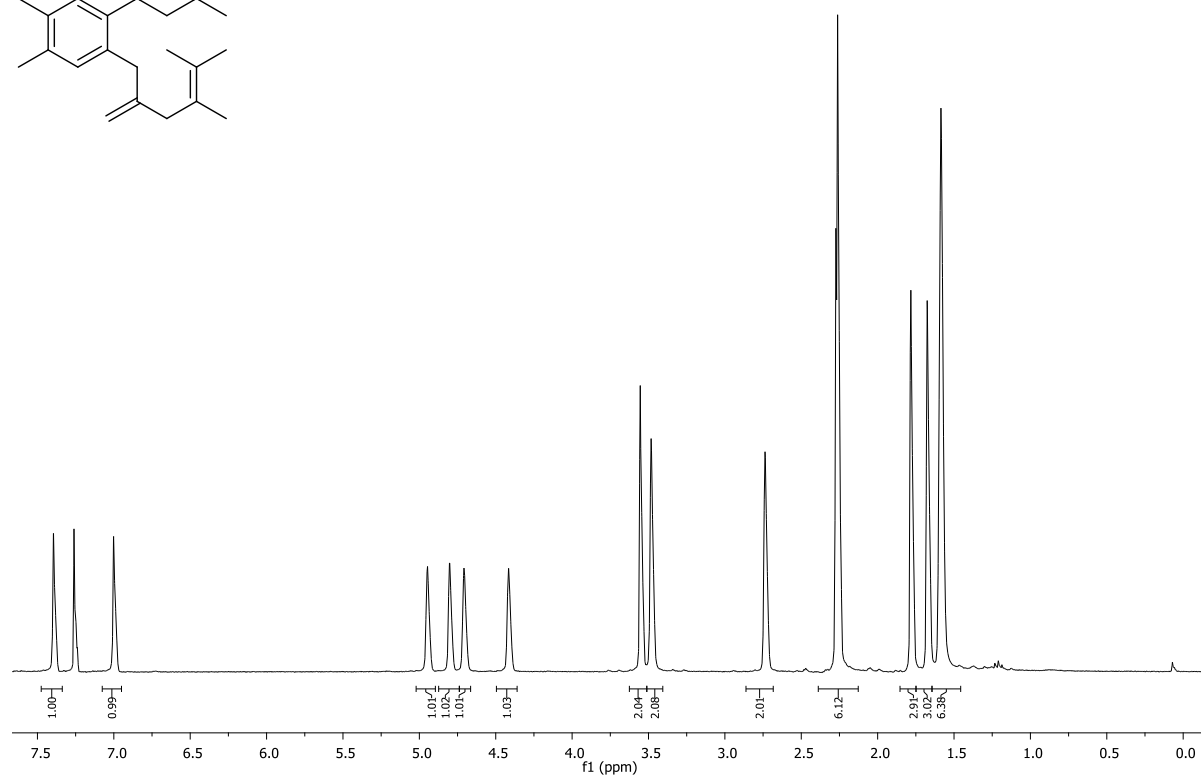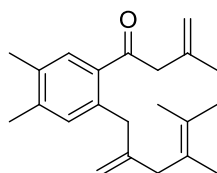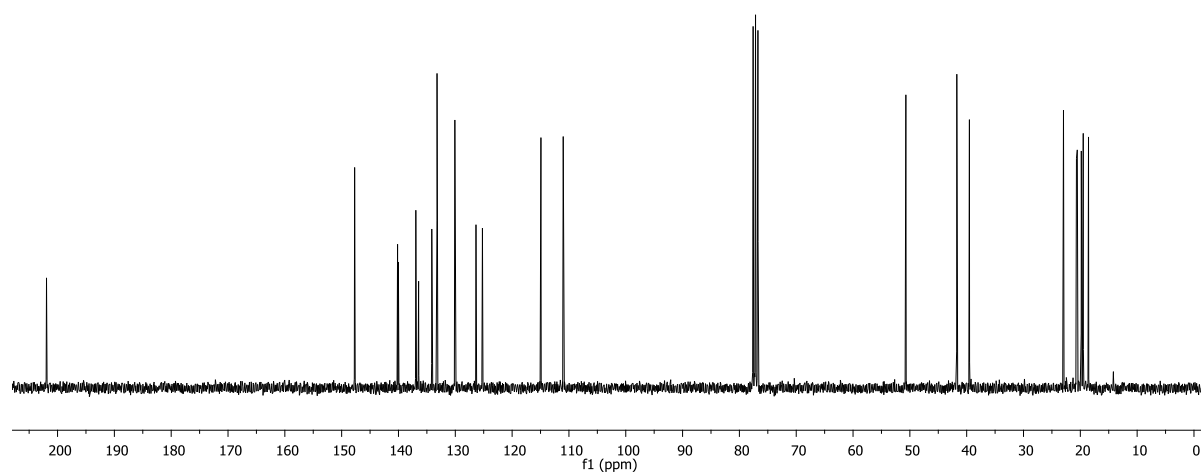

**1-(2-(4,5-Dimethyl-2-methylenhex-4-enyl)-4,5-dimethylphenyl)-5,6-dimethyl-3-methylenhept-5-en-1-one (7)**

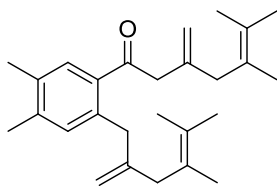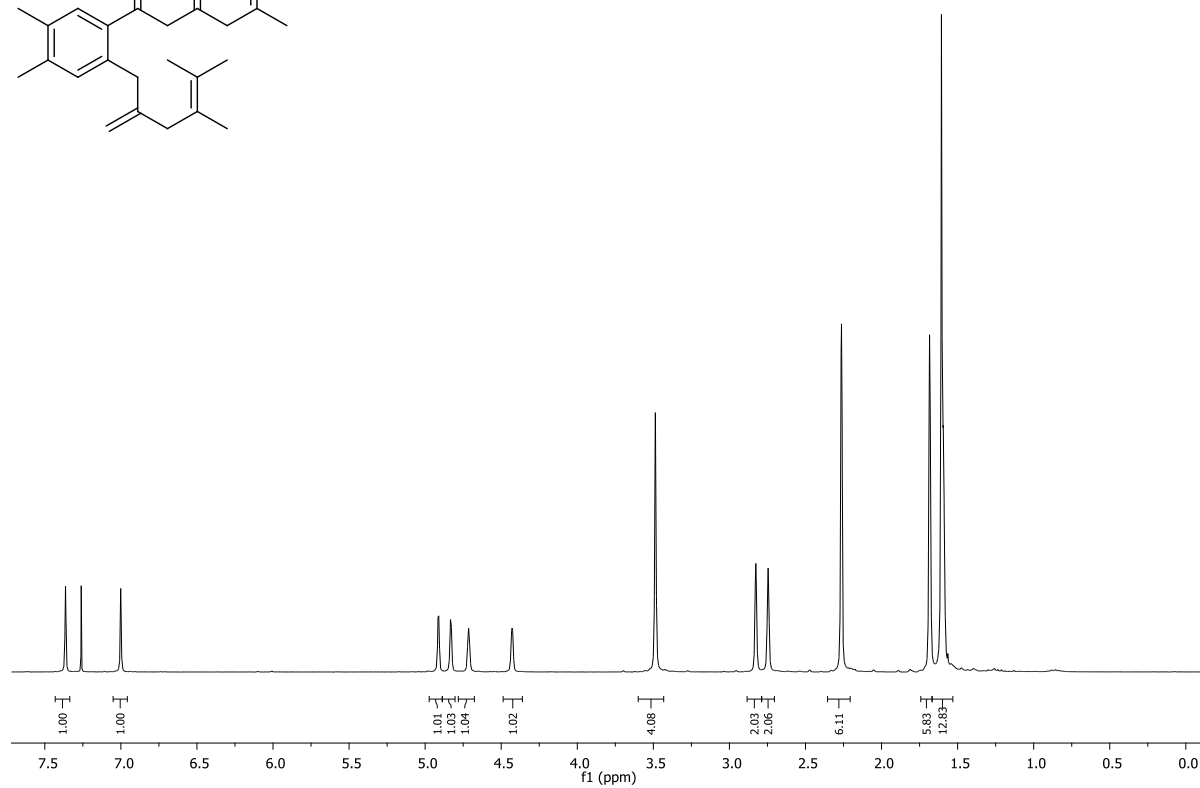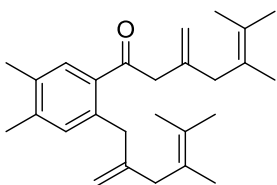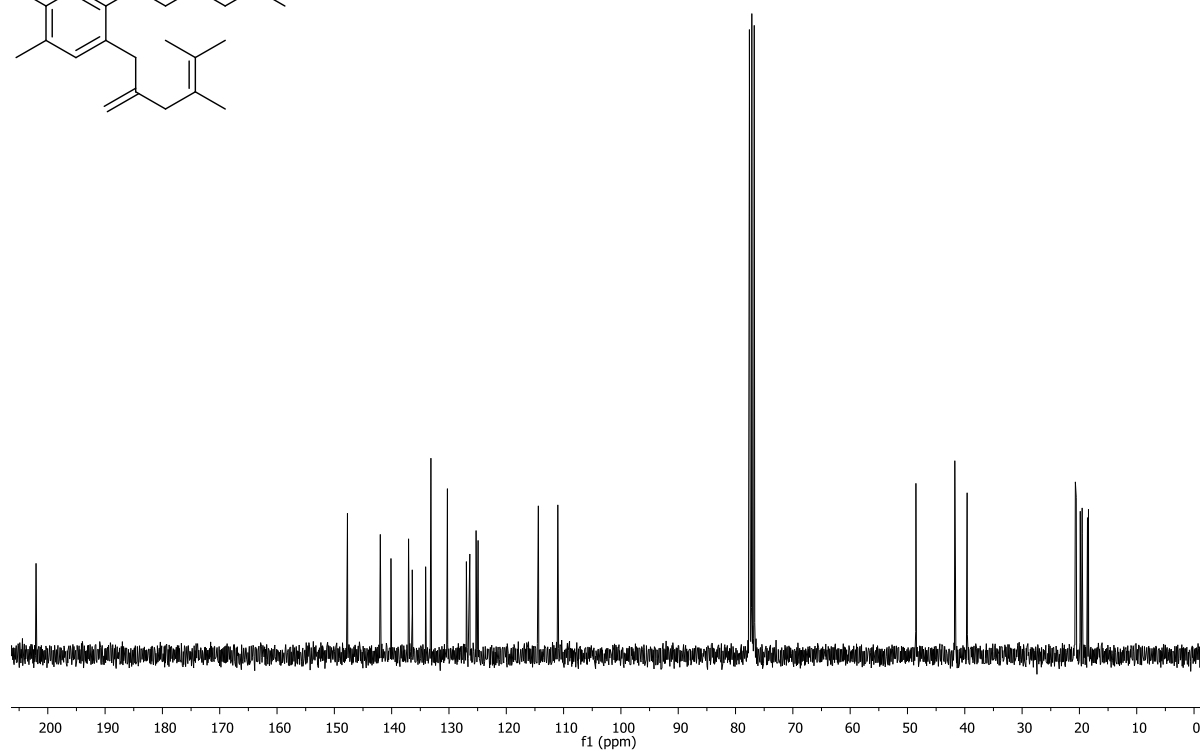

**1-(2-(4,5-Dimethyl-2-methylenehex-4-enyl)-4-methylphenyl)-5,6-dimethyl-3-methylenehept-5-en-1-one (51)**

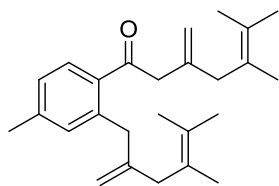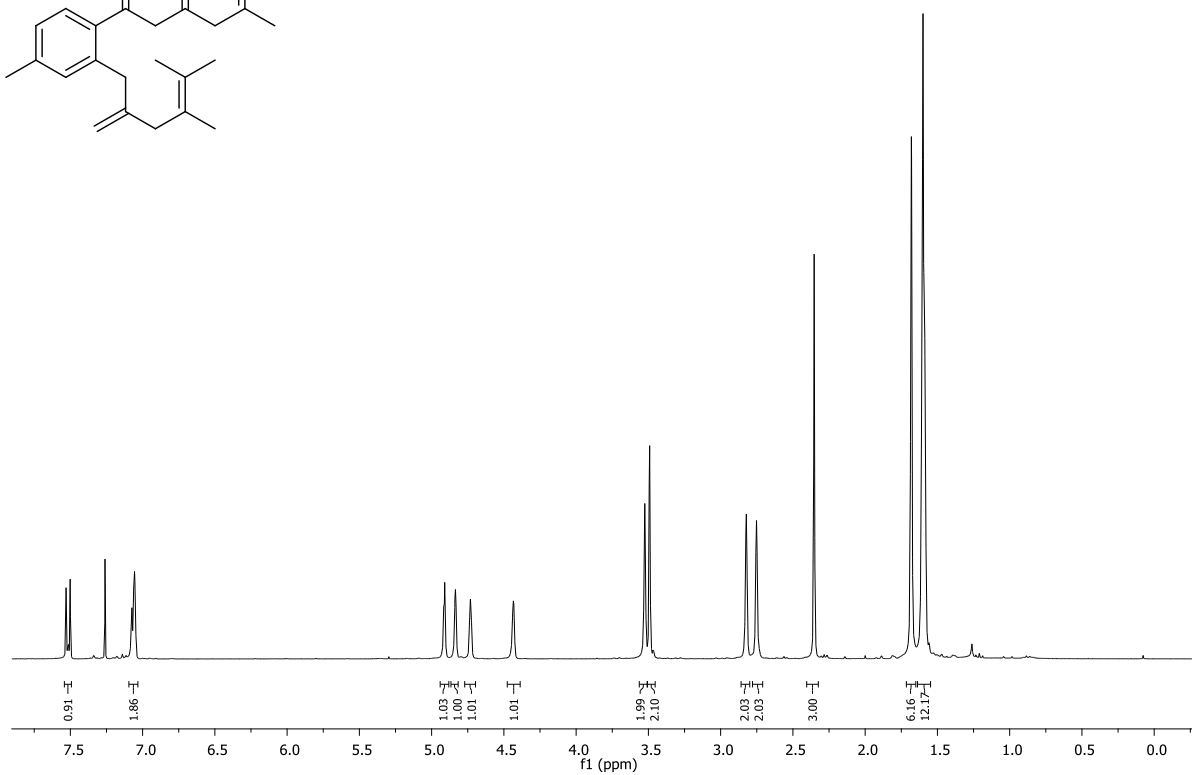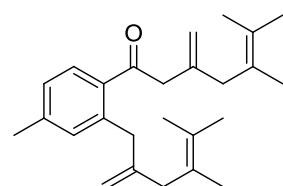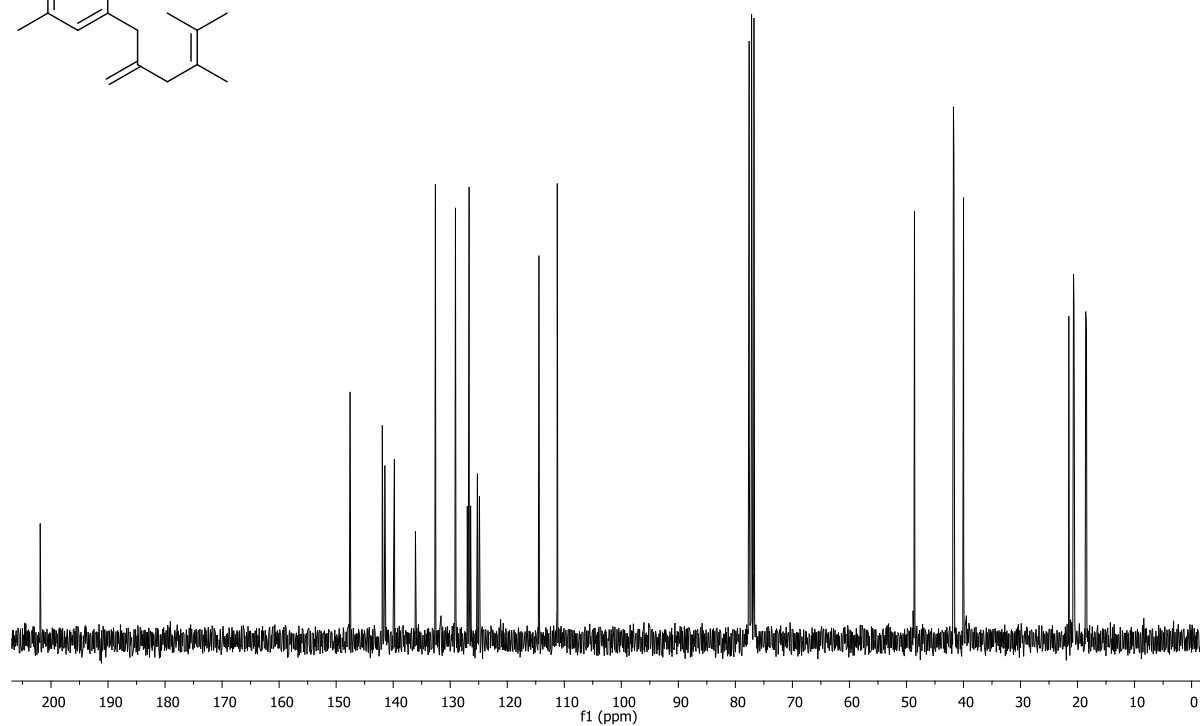

**1-(3-Hydroxy-6,7-dimethylnaphthalene-2-yl)ethanone (27)**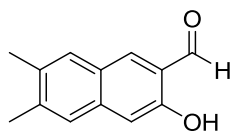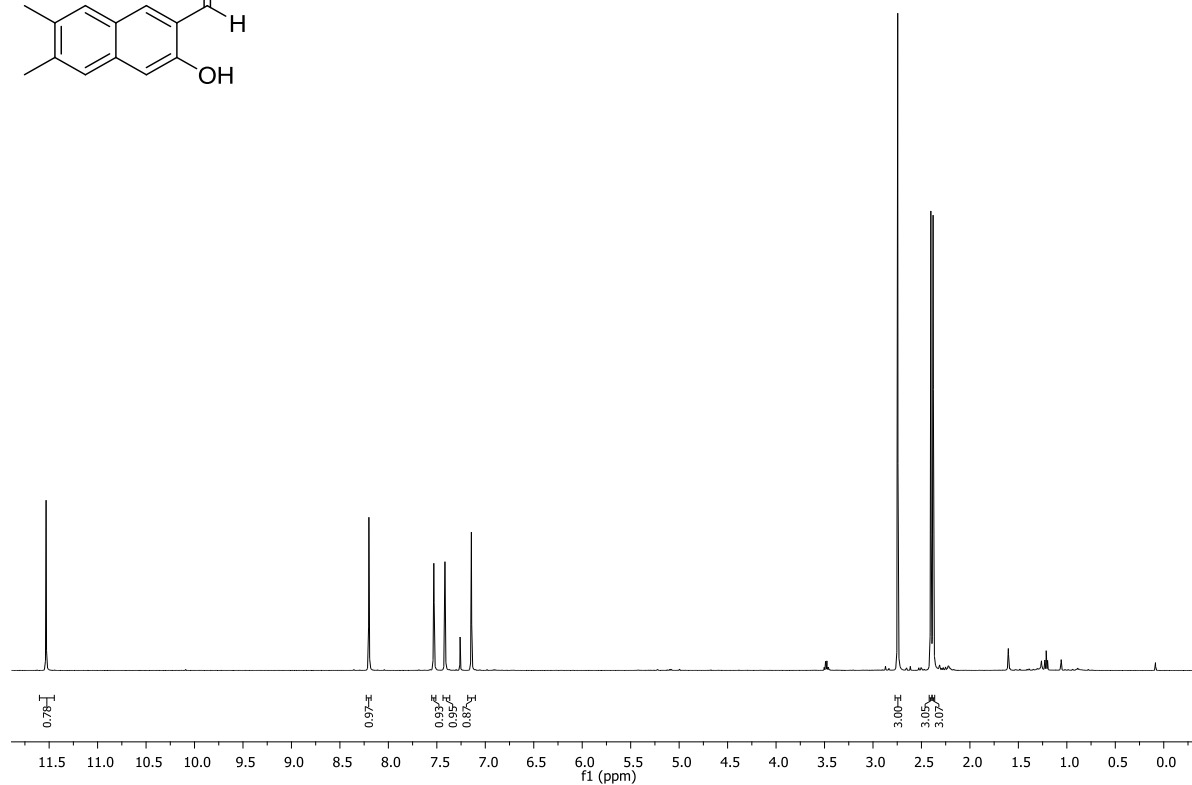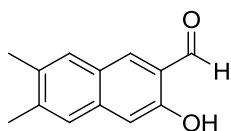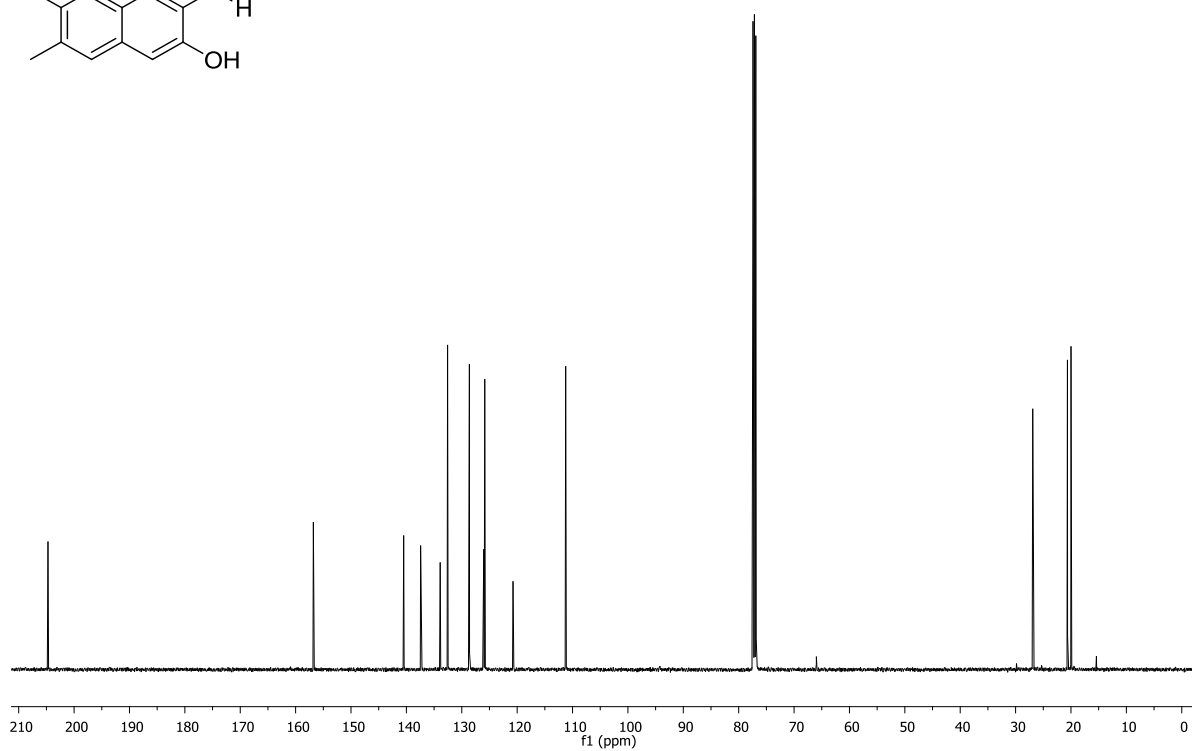



**1-(1-Hydroxy-6,7-dimethylnaphthalen-2-yl)ethanon (29)**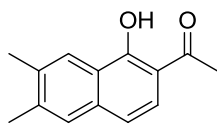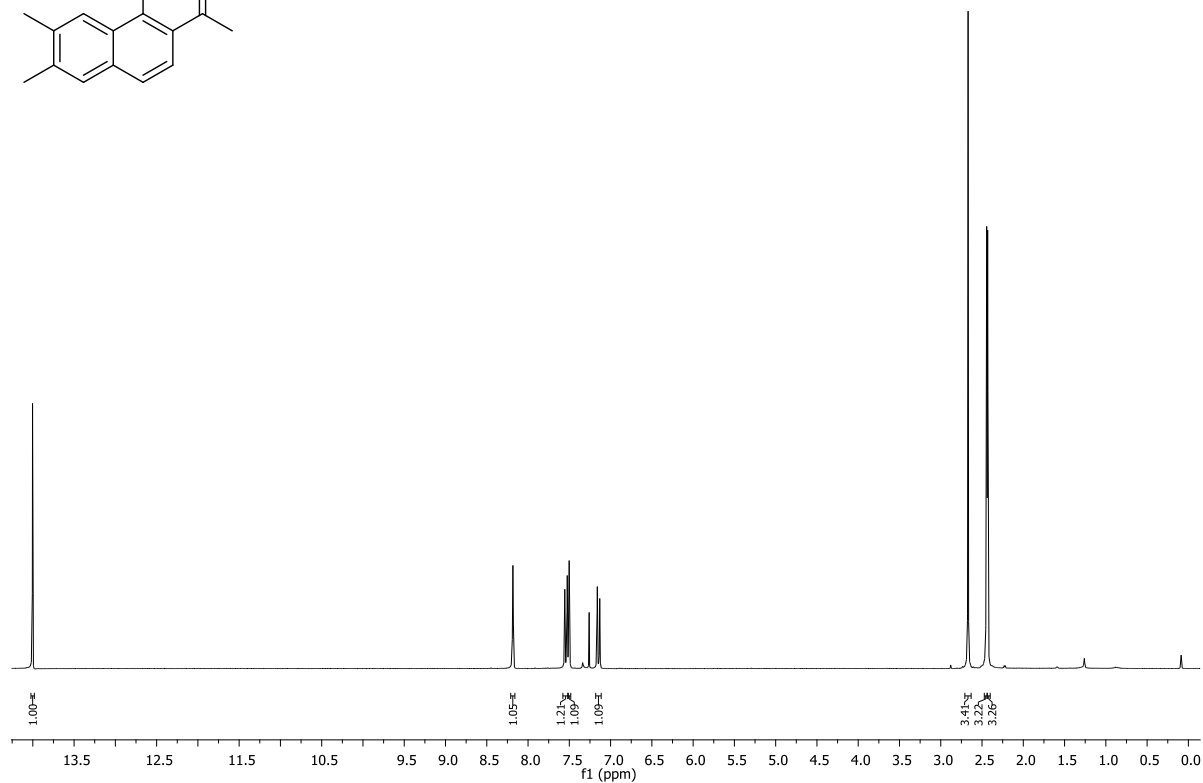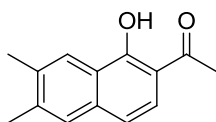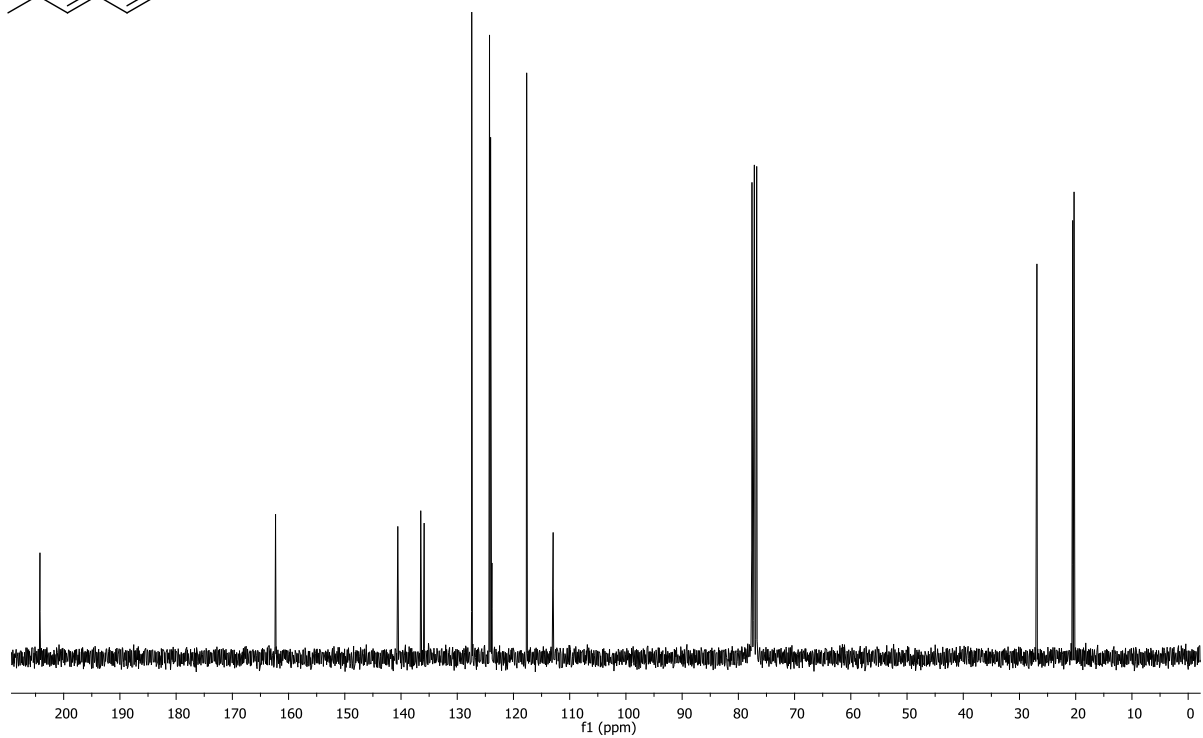

**1-(2-((1,2,4-Trioxolan-3-yl)methyl)-4,5-dimethylphenyl)-2-(3-methyl-1,2,4-trioxolan-3-yl)ethanon  
(28)**

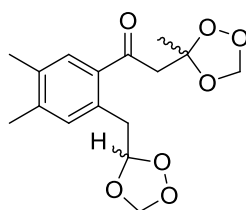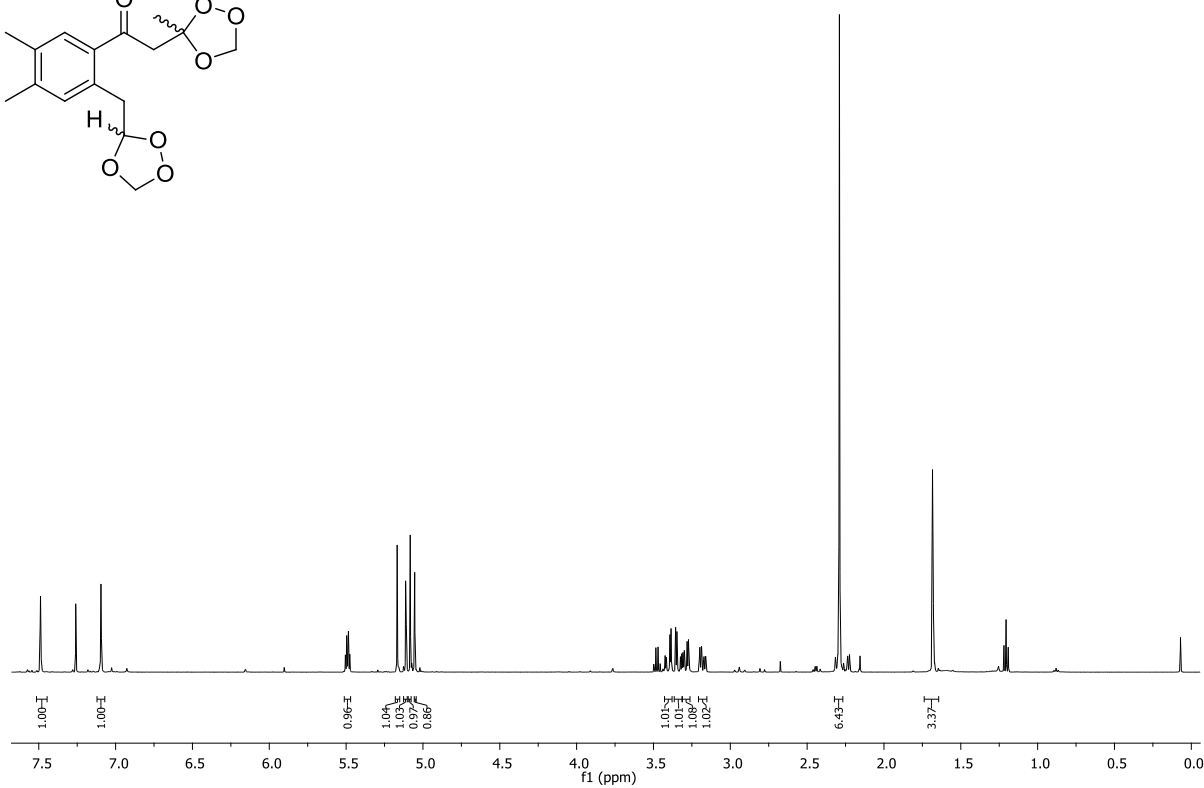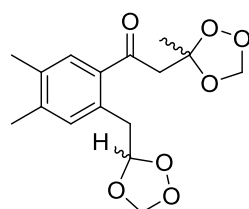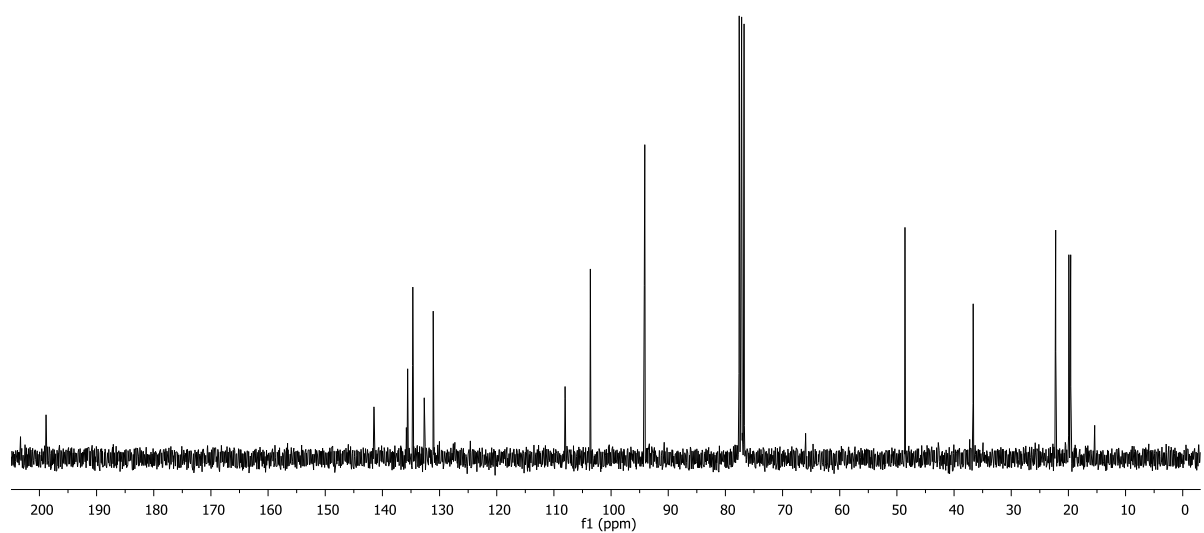

**1-Hydroxy-6,7-dimethyl-2-naphthaldehyde (31)**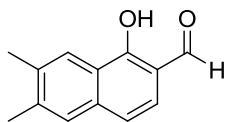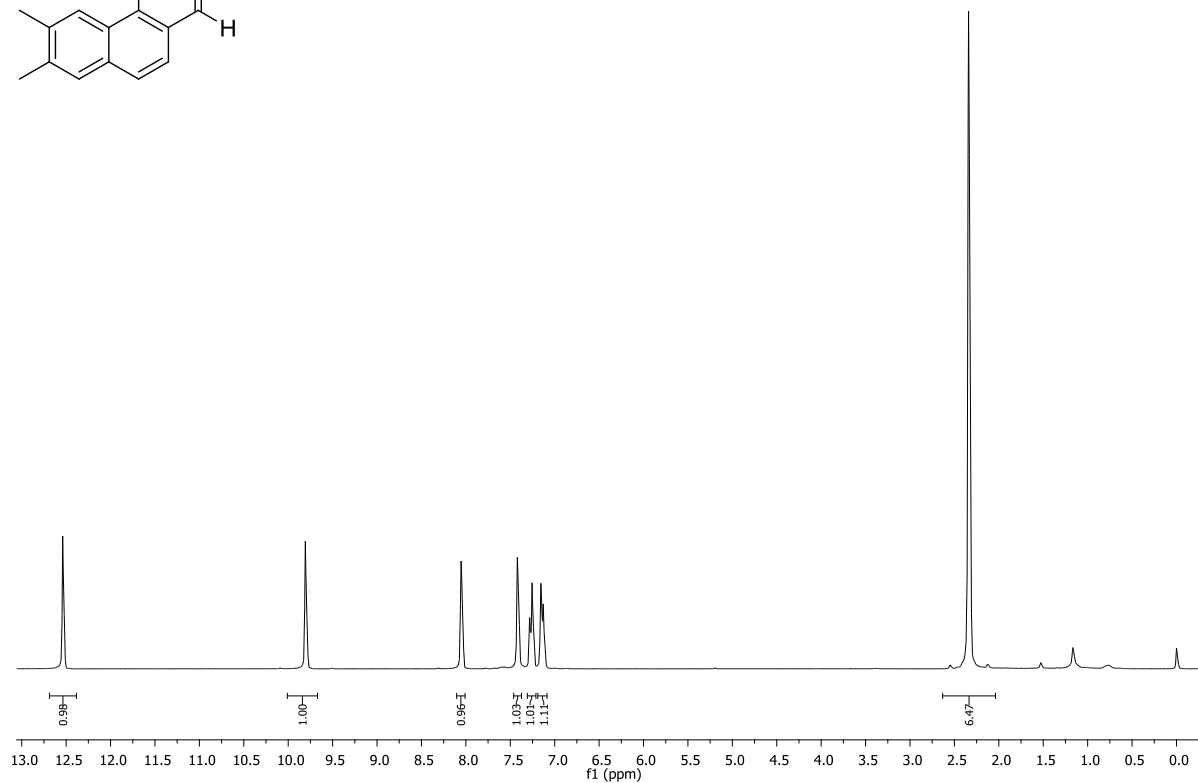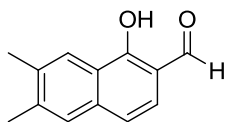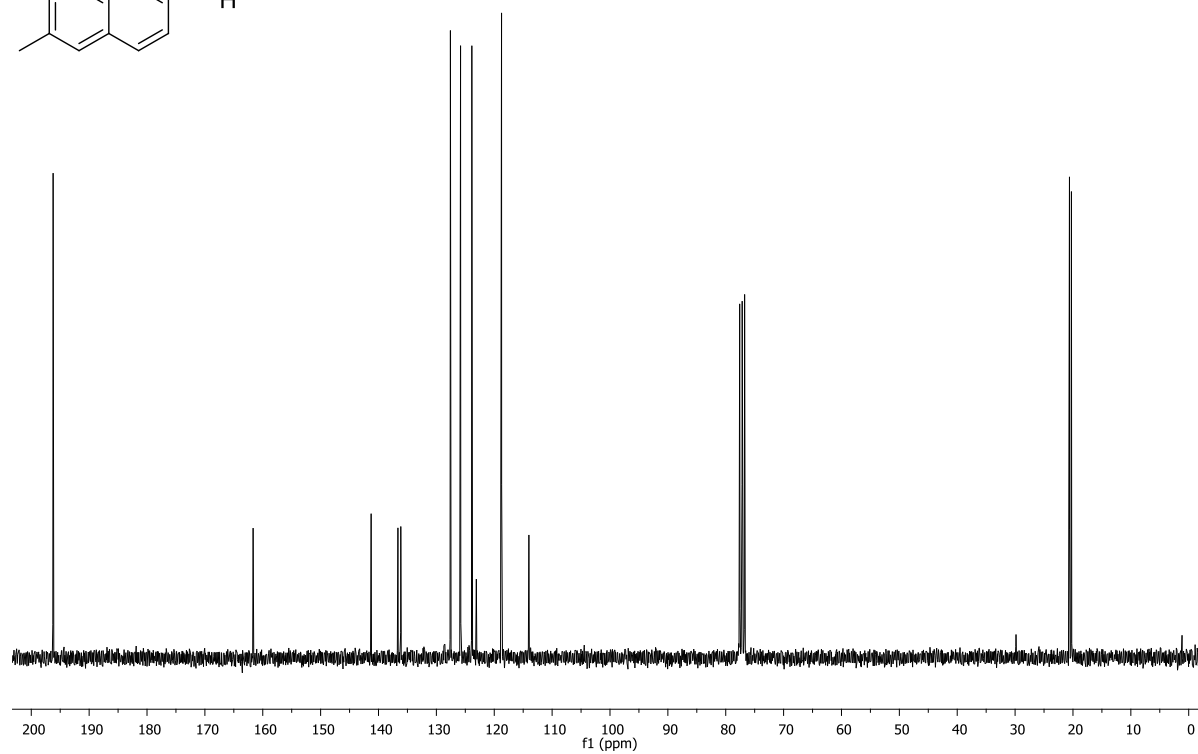

**1-(1-Hydroxy-3,6,7-trimethylnaphthalene-2-yl)ethanone (35)**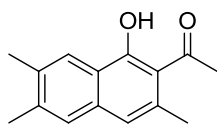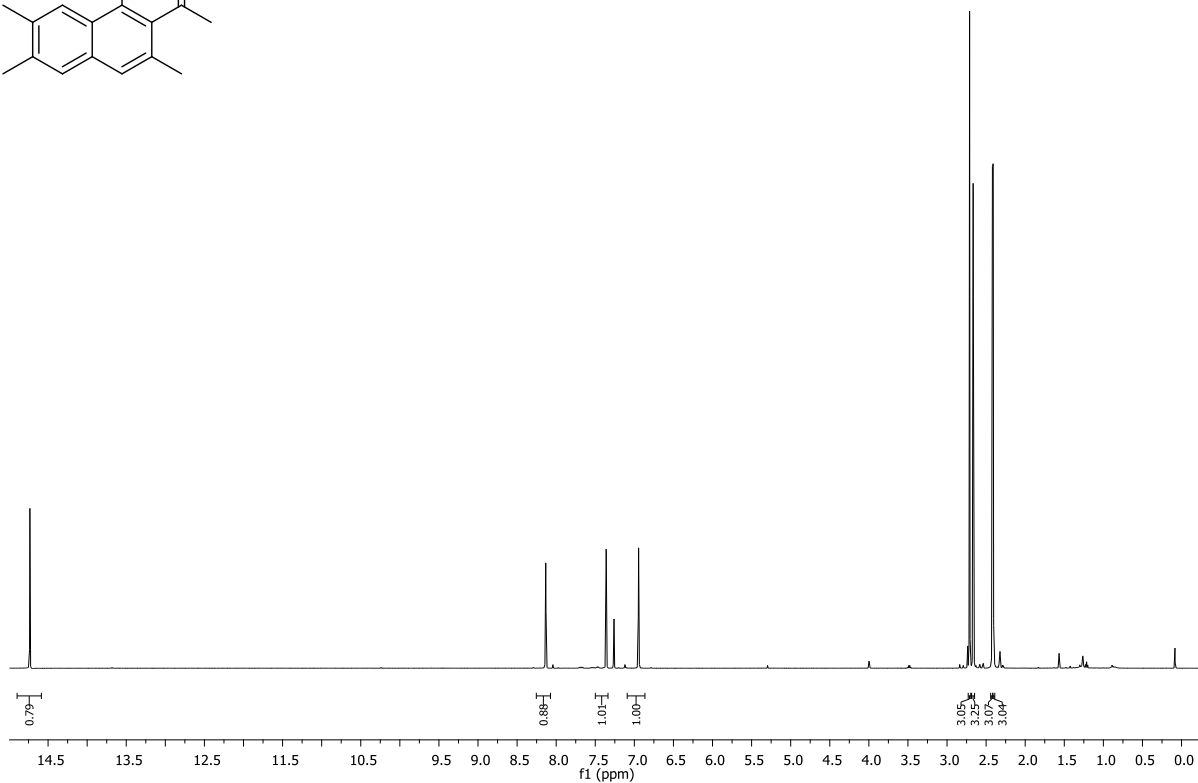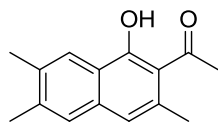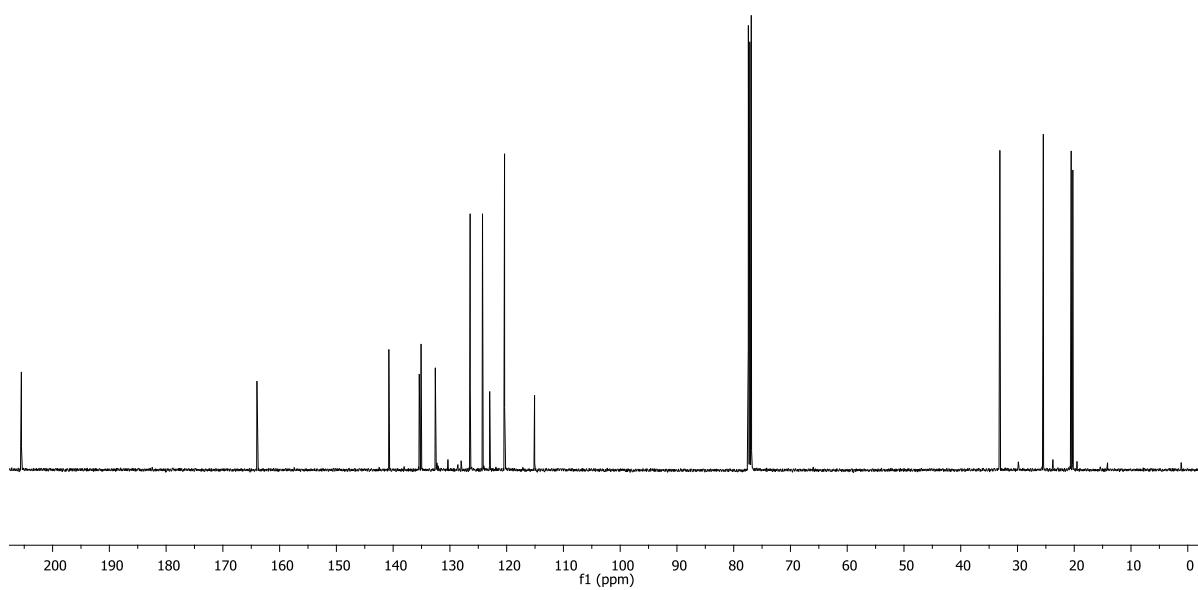

**Compound 32**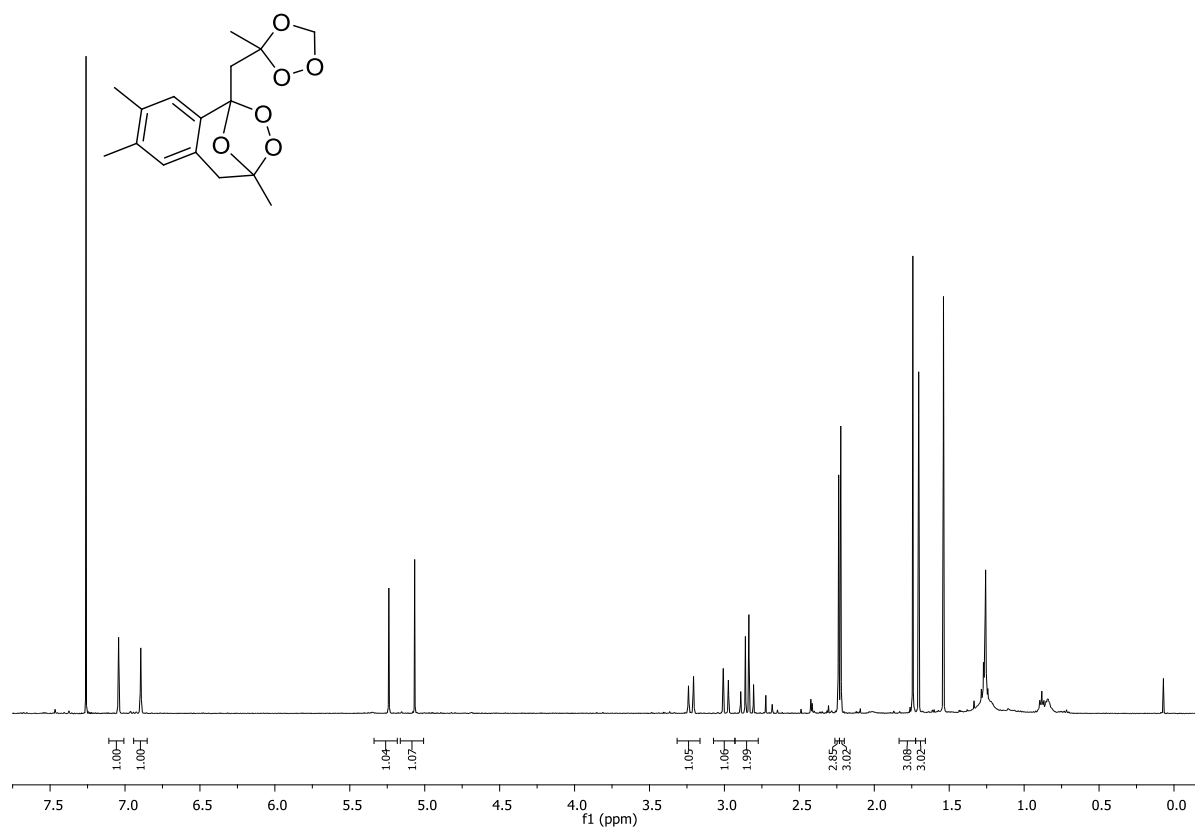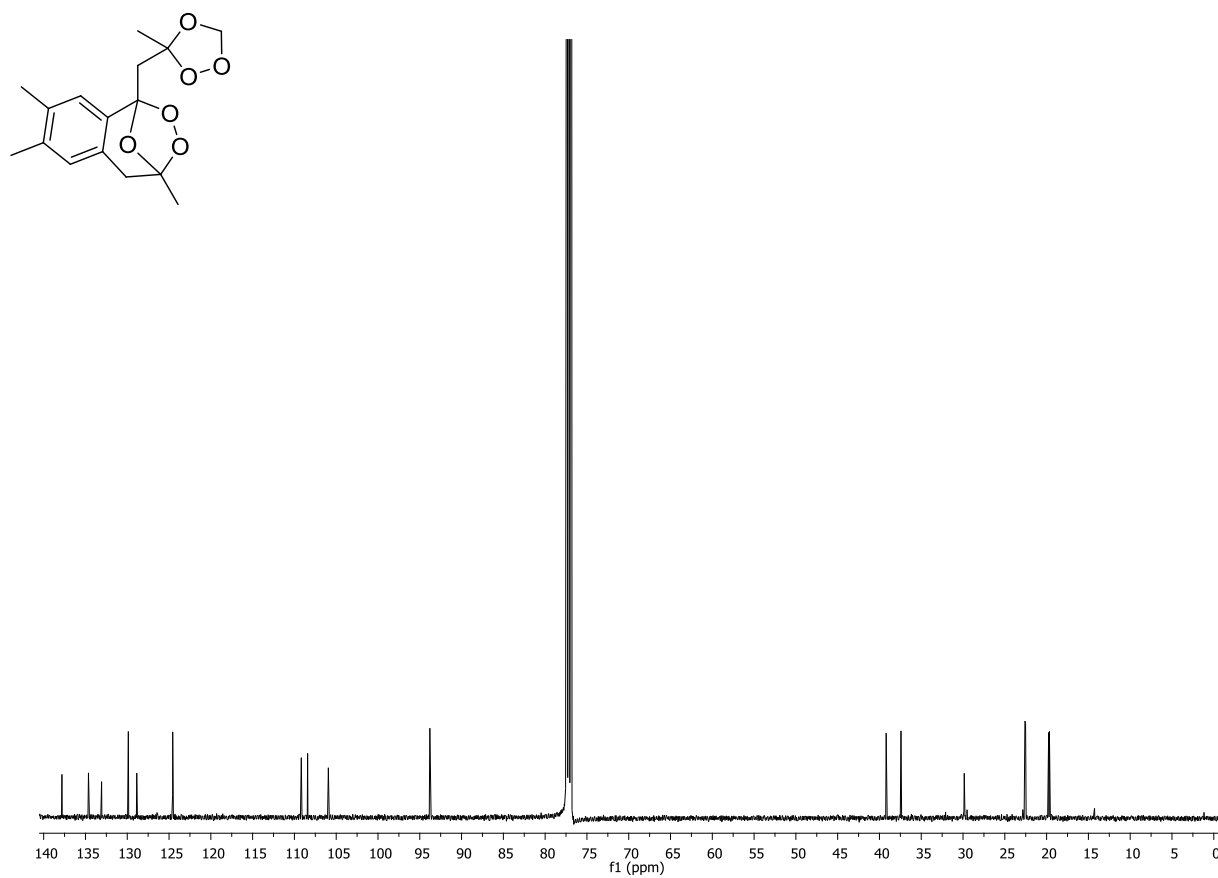

**Compound 33**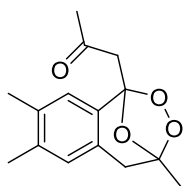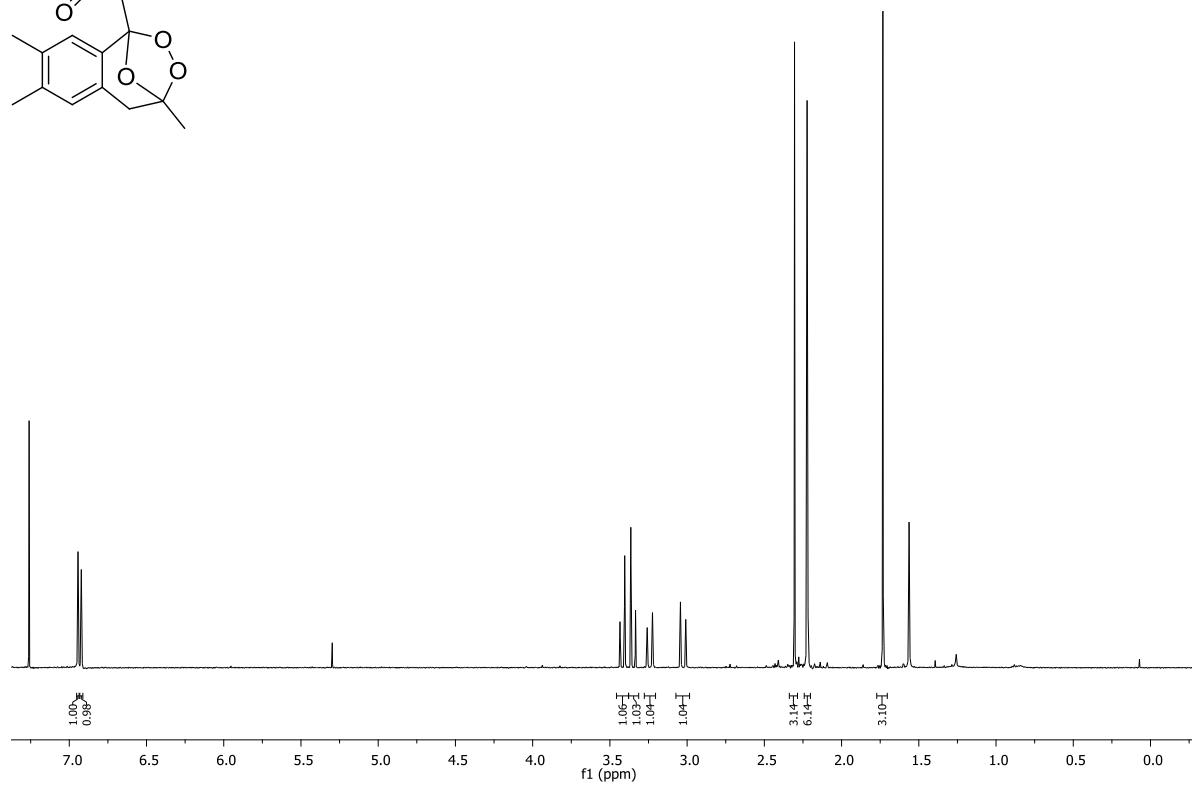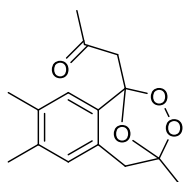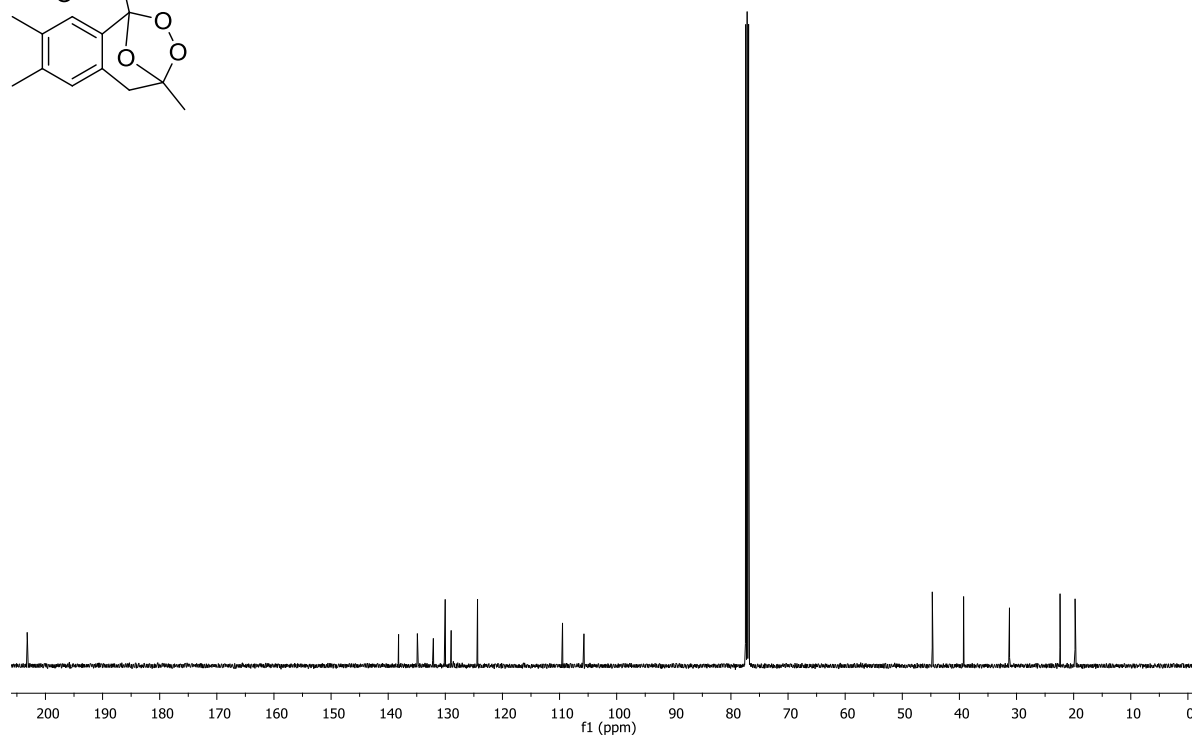

## Compound 34

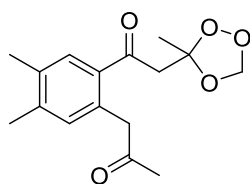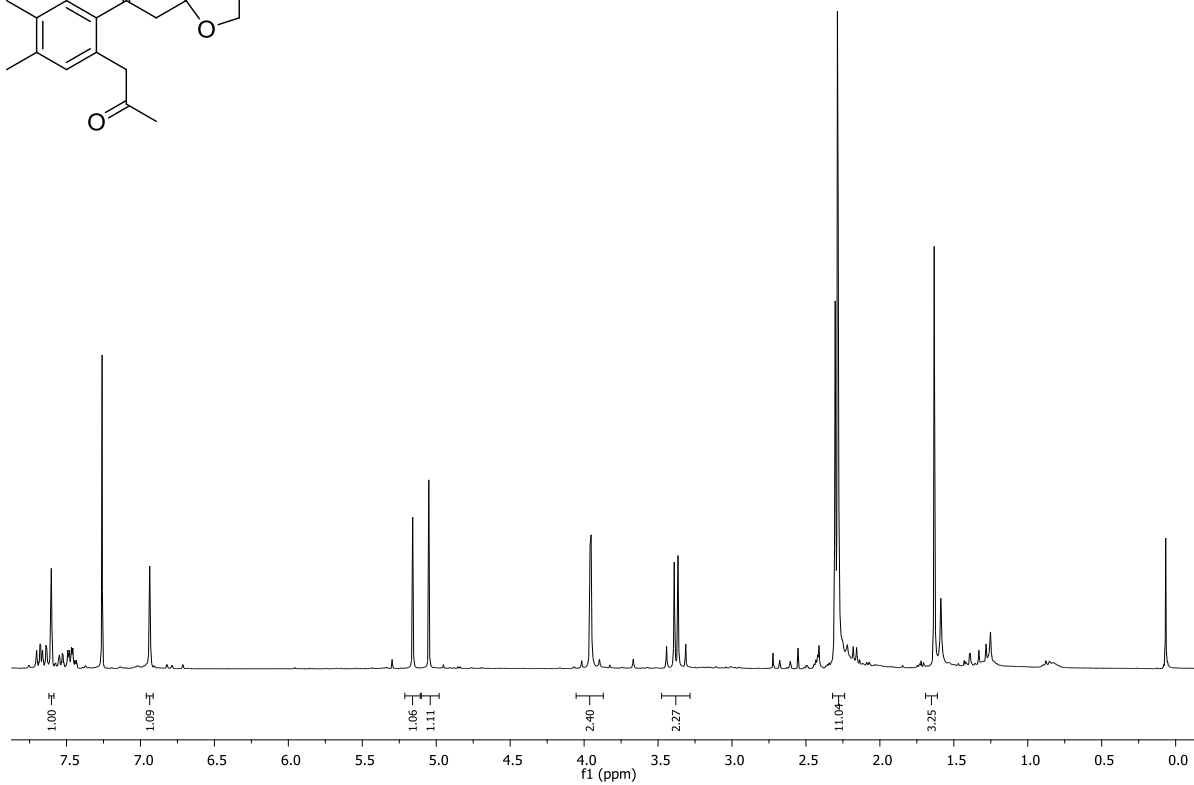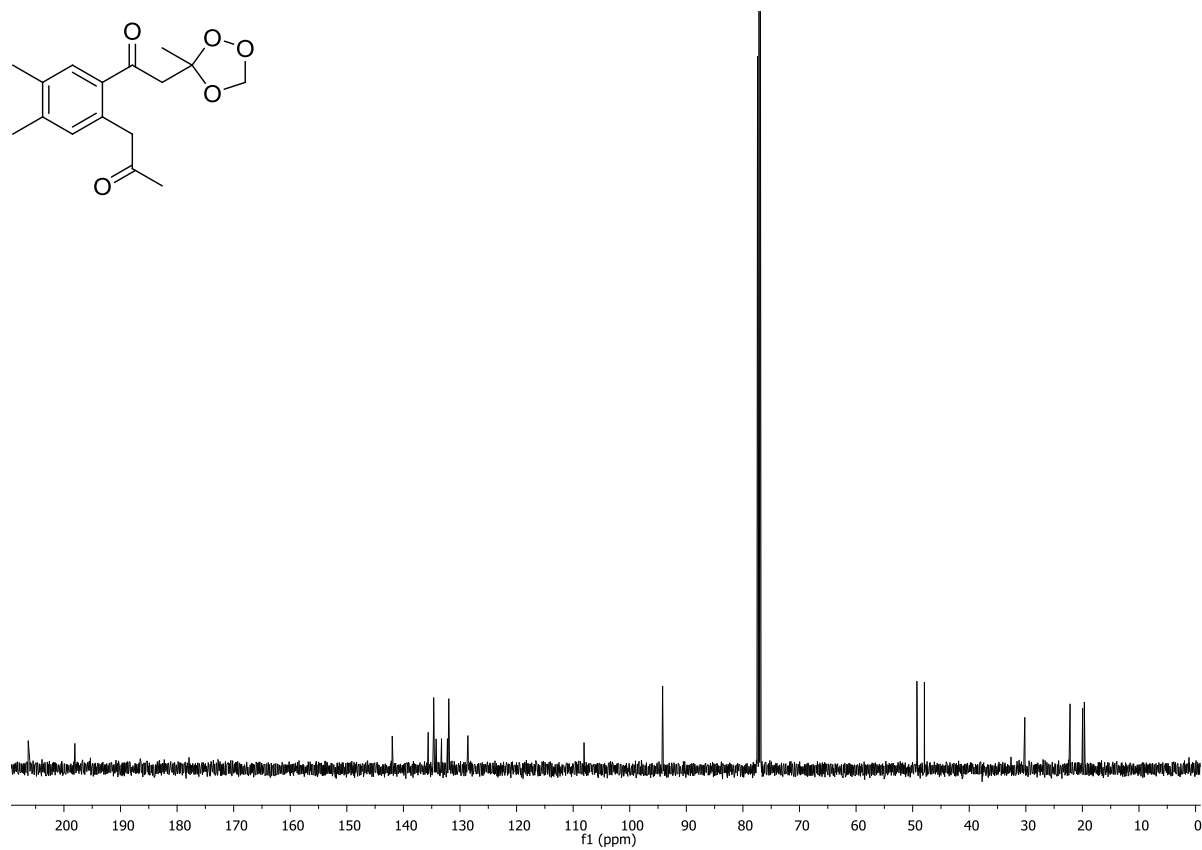

**1-Hydroxy-3,6,7-trimethyl-2-naphthaldehyde (37)**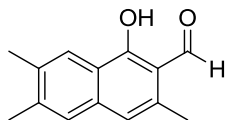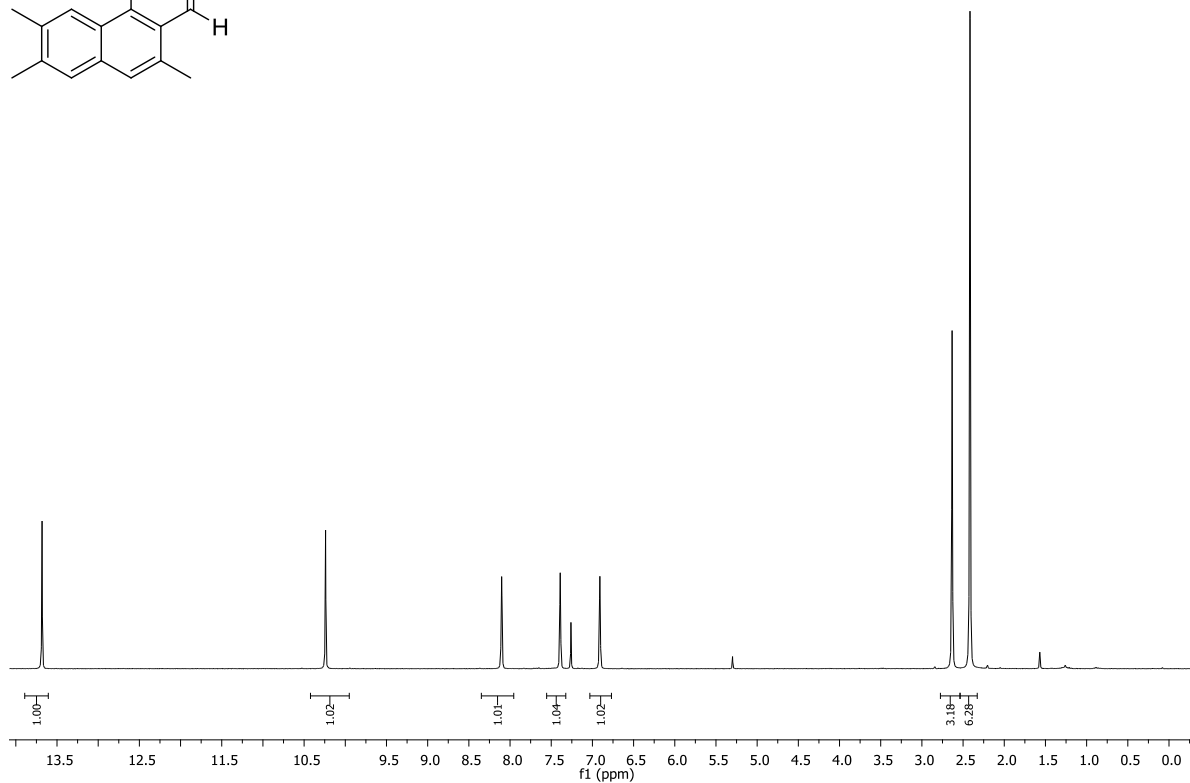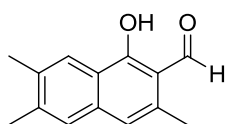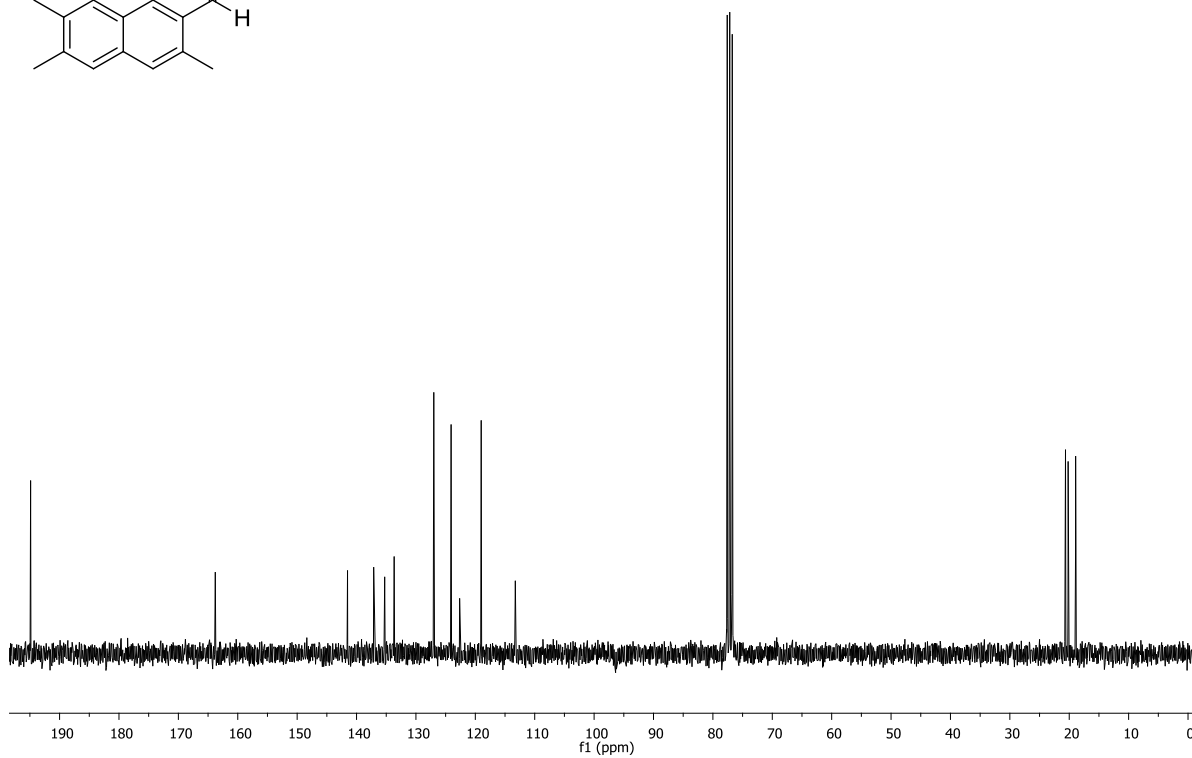



**2-Hydroxy-2,5,8,9-tetramethyl-2H-benzo[*h*]chromen-4(3*H*)one (39)**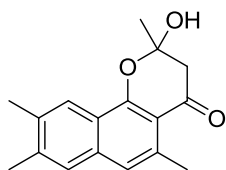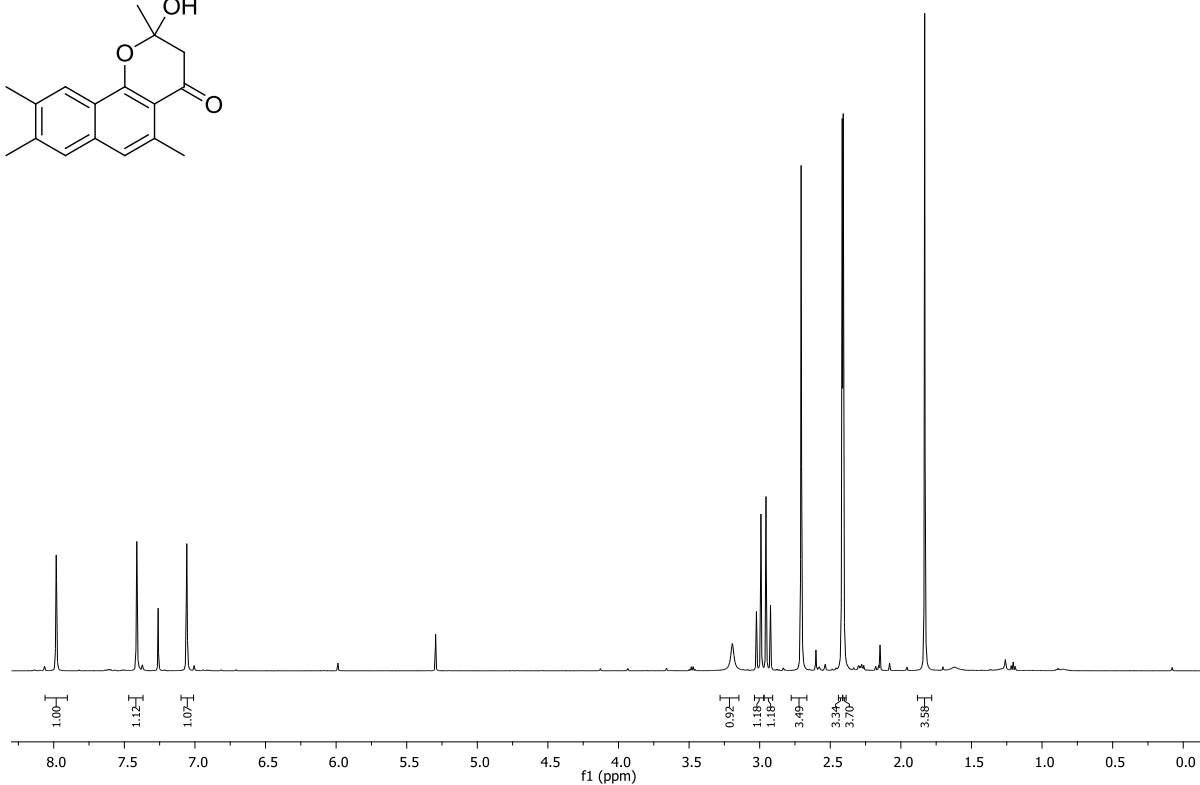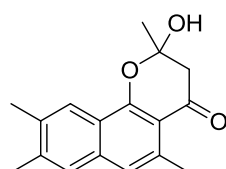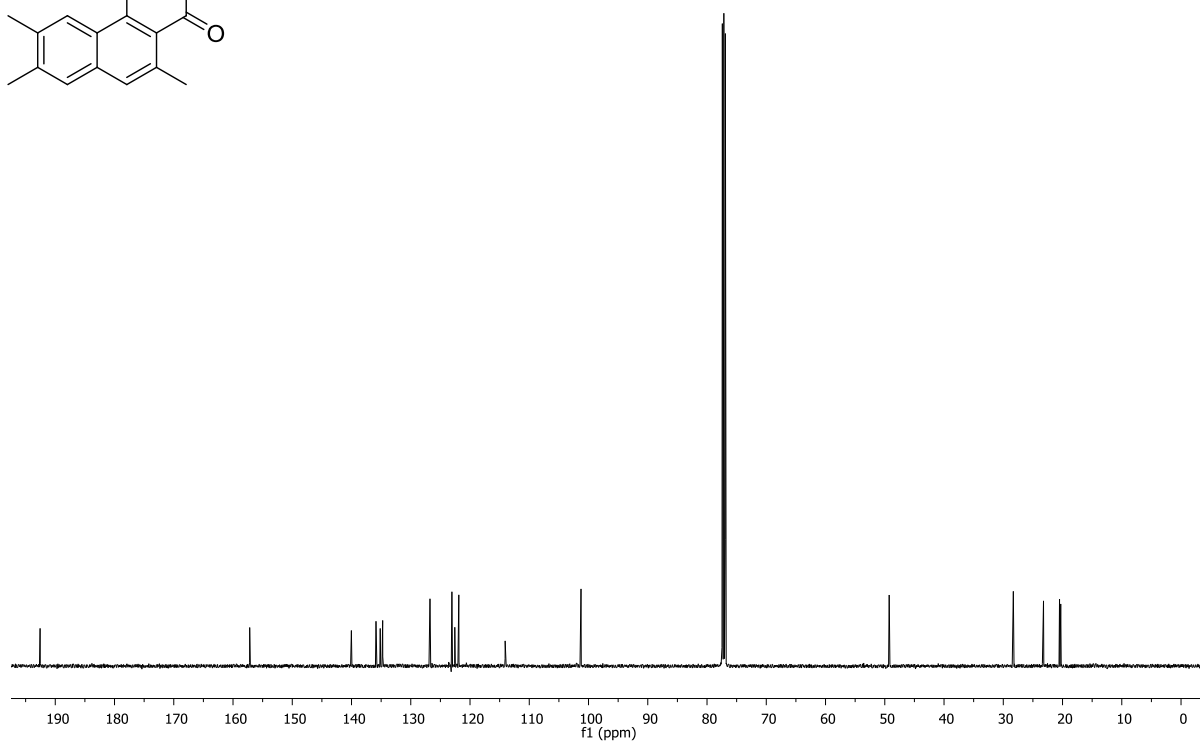

**2,5,8,9-Tetramethyl-4H-benzo[*h*]chromen-4-one (40)**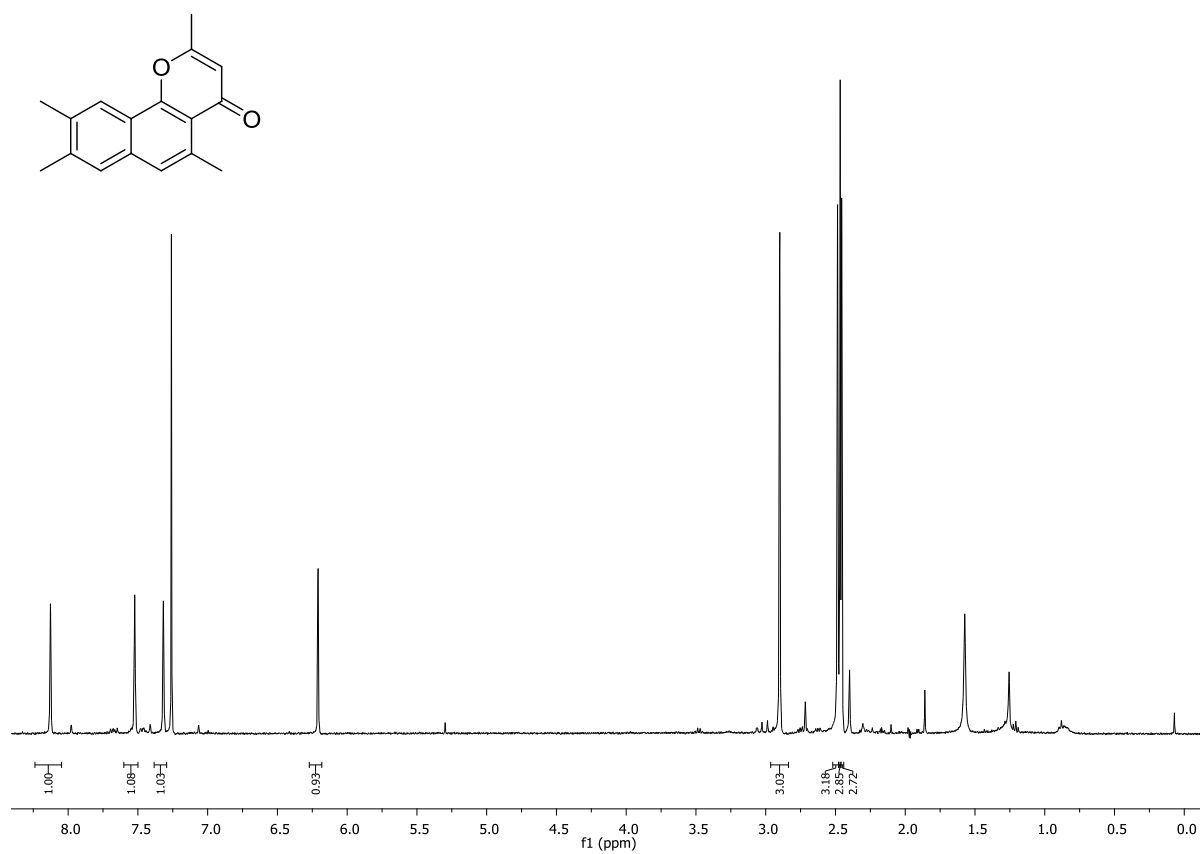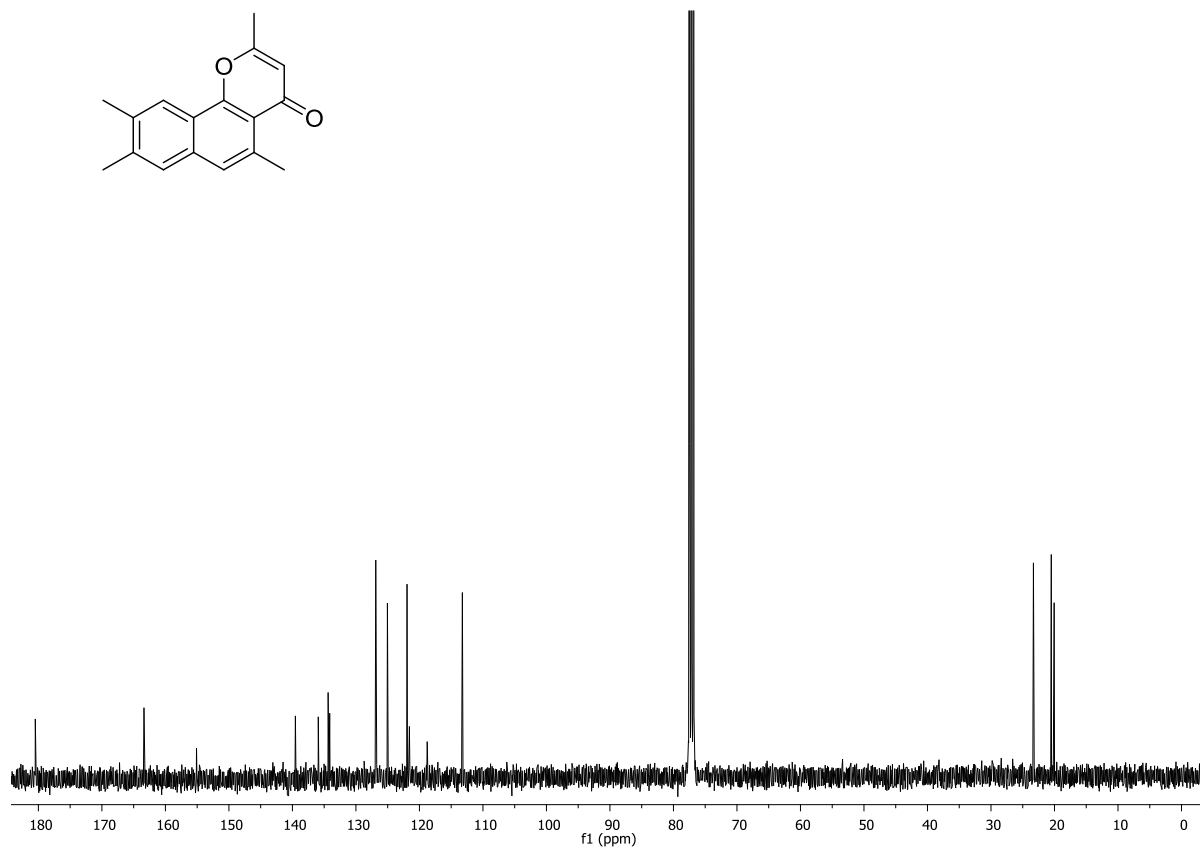

**1-(3-Acetyl-4-hydroxy-6,7-dimethylnaphthalene-2-yl)propan-2-one (41)**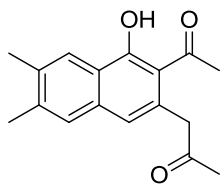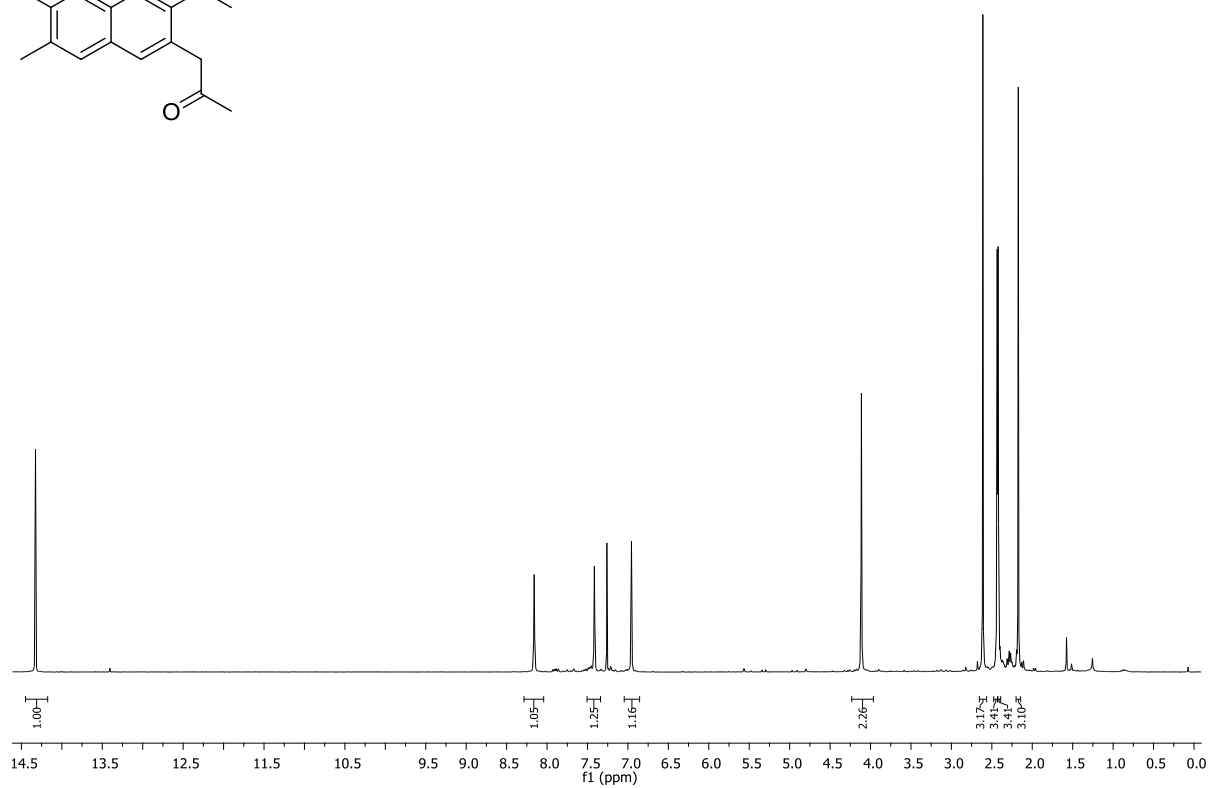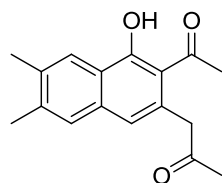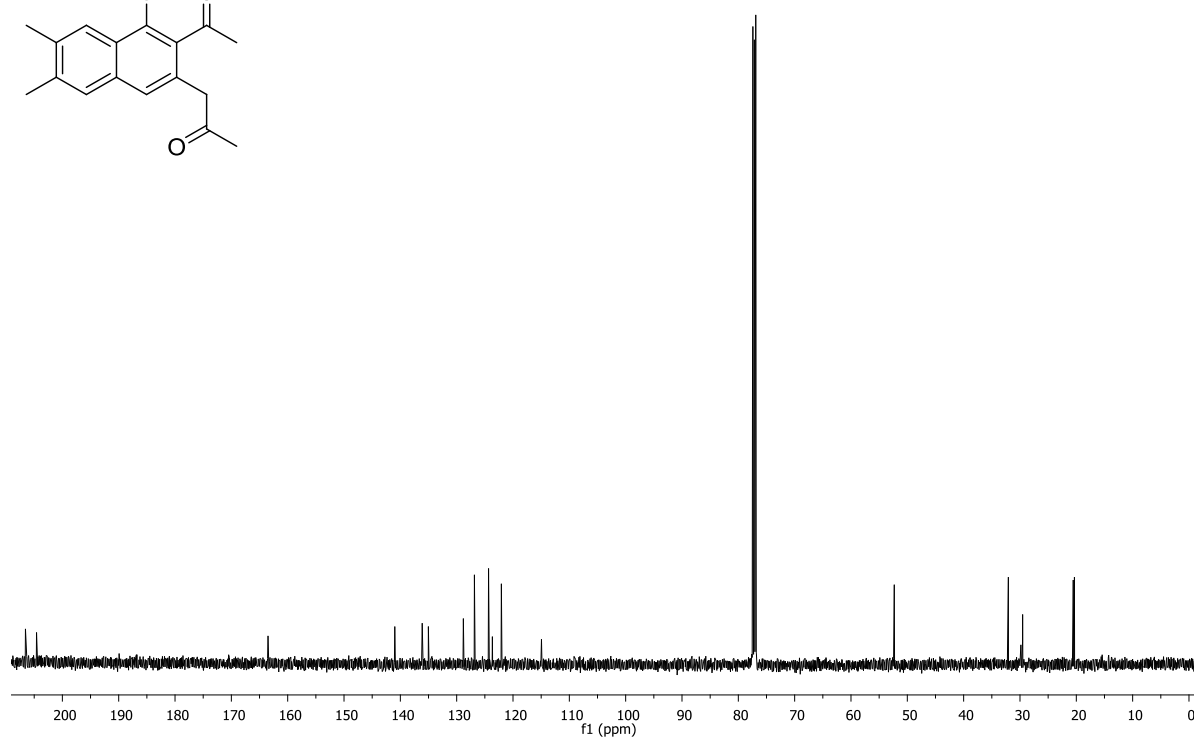

**1-Hydroxy-6,7-dimethyl-3-(2-oxopropyl)-2-naphthaldehyde (42)**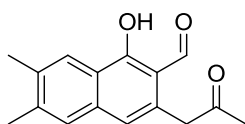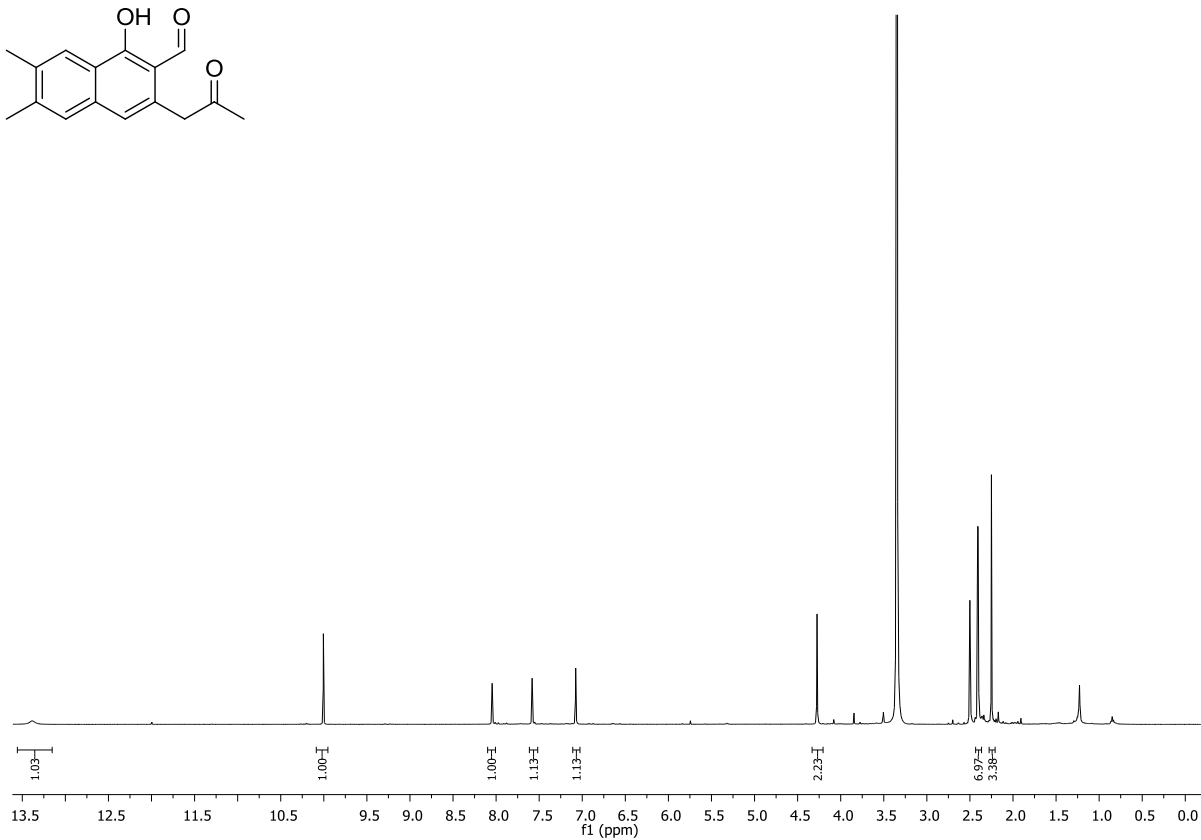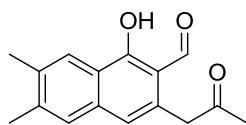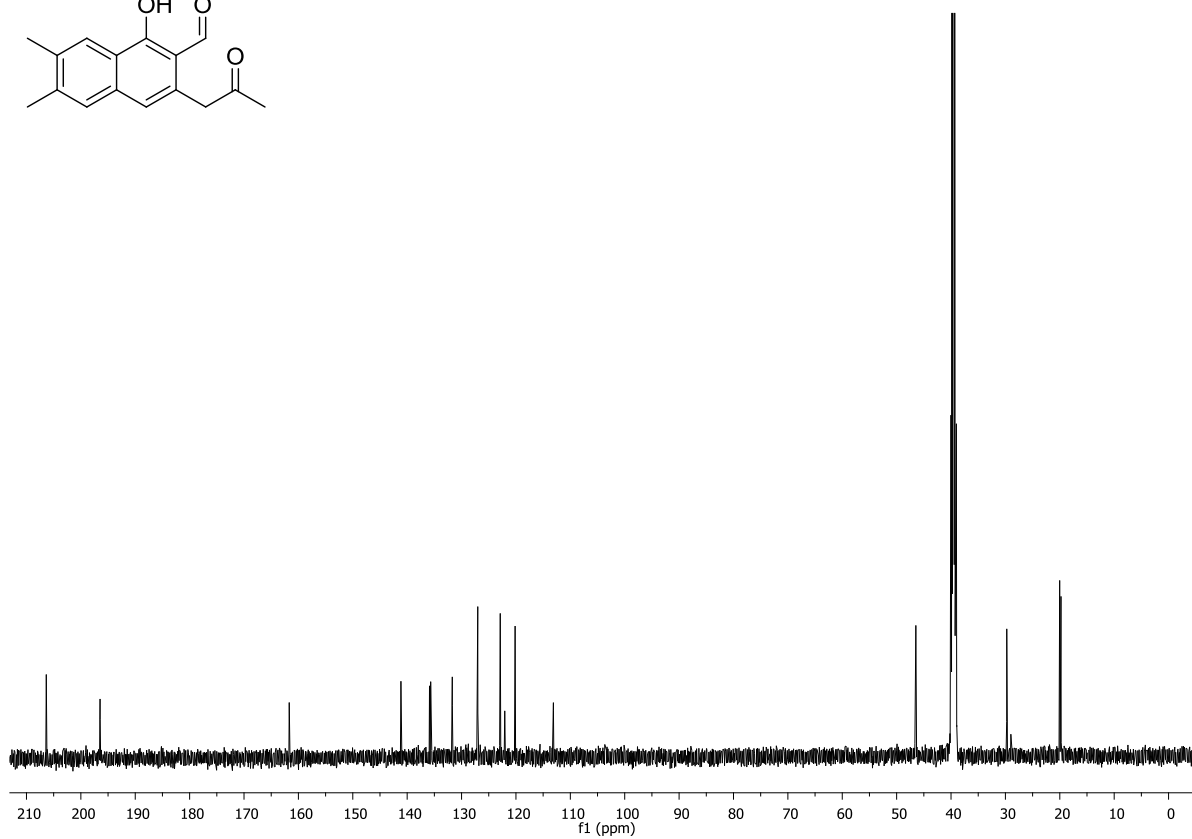

**Trioxadamantane 45 (main isomer)**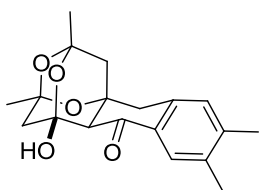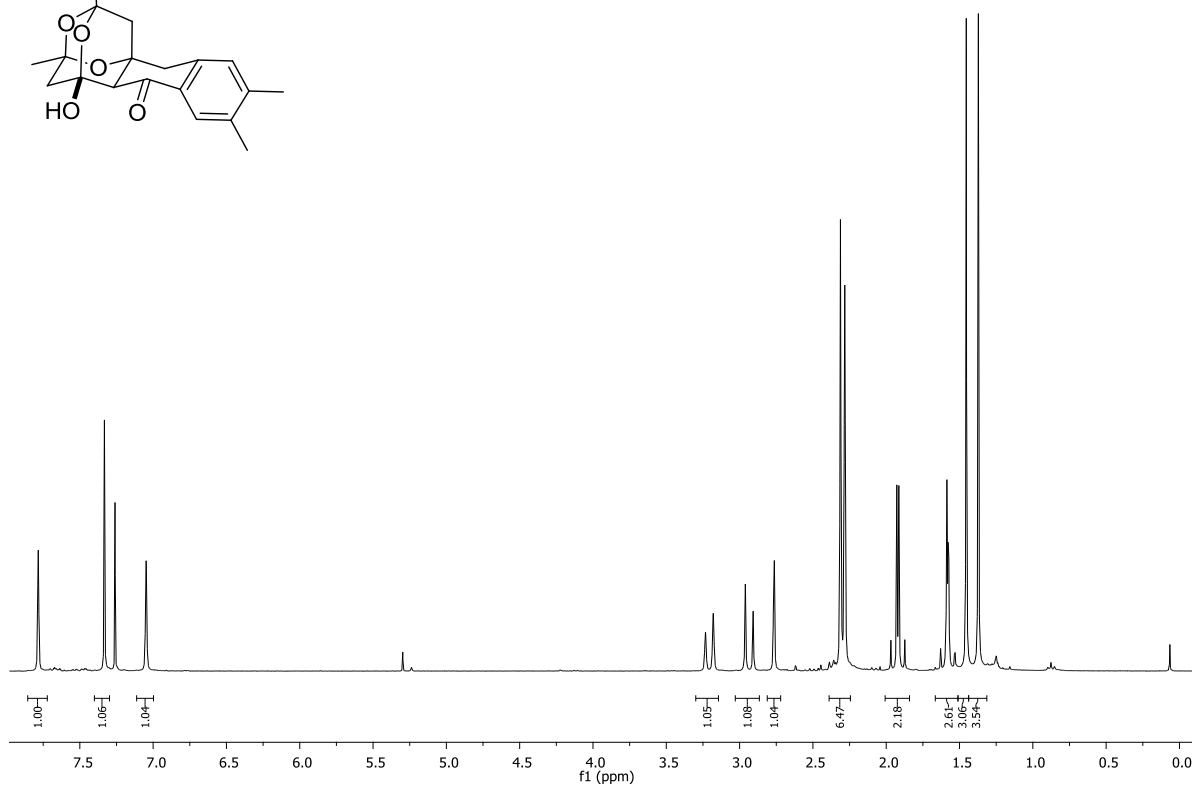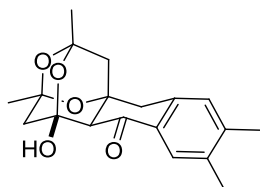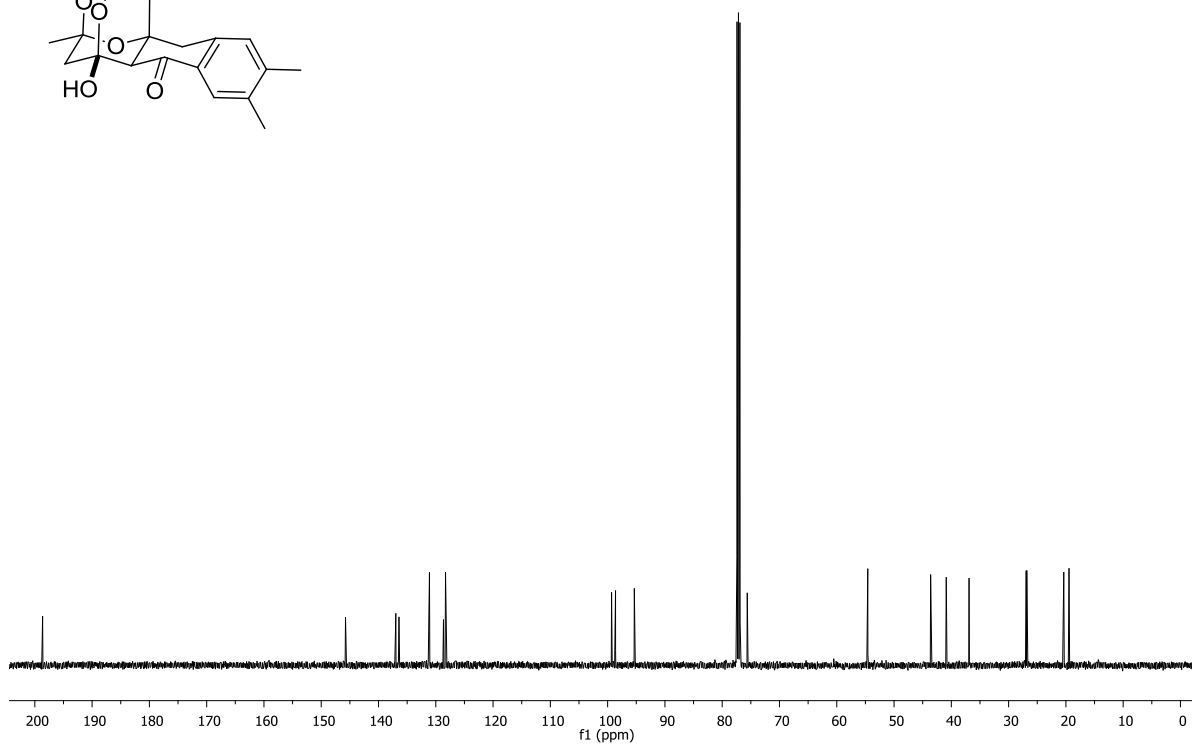

**Trioxaadamantane 46 (minor isomer)**proposed structures for trioxaadamantane **46**: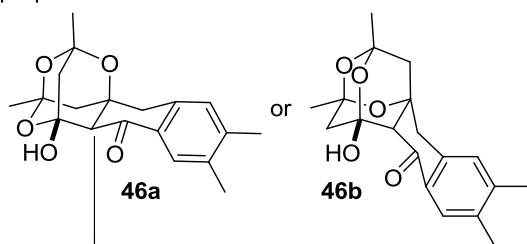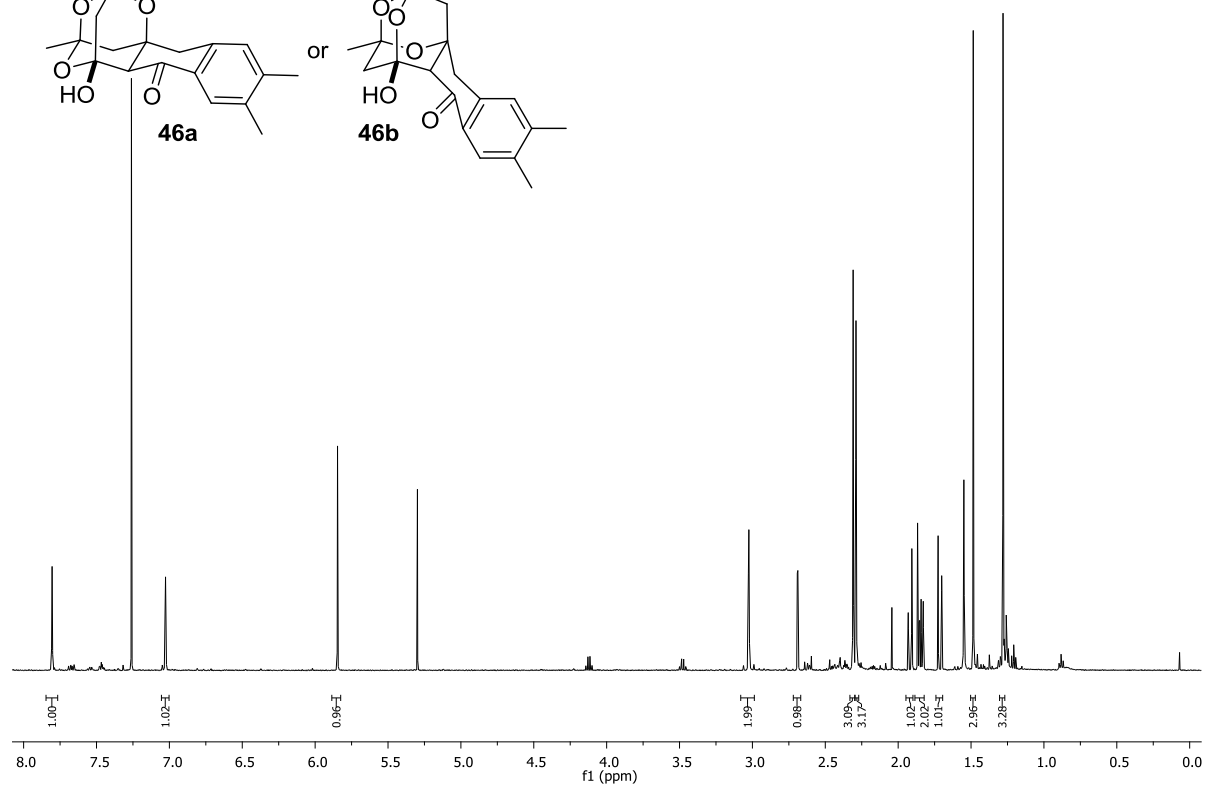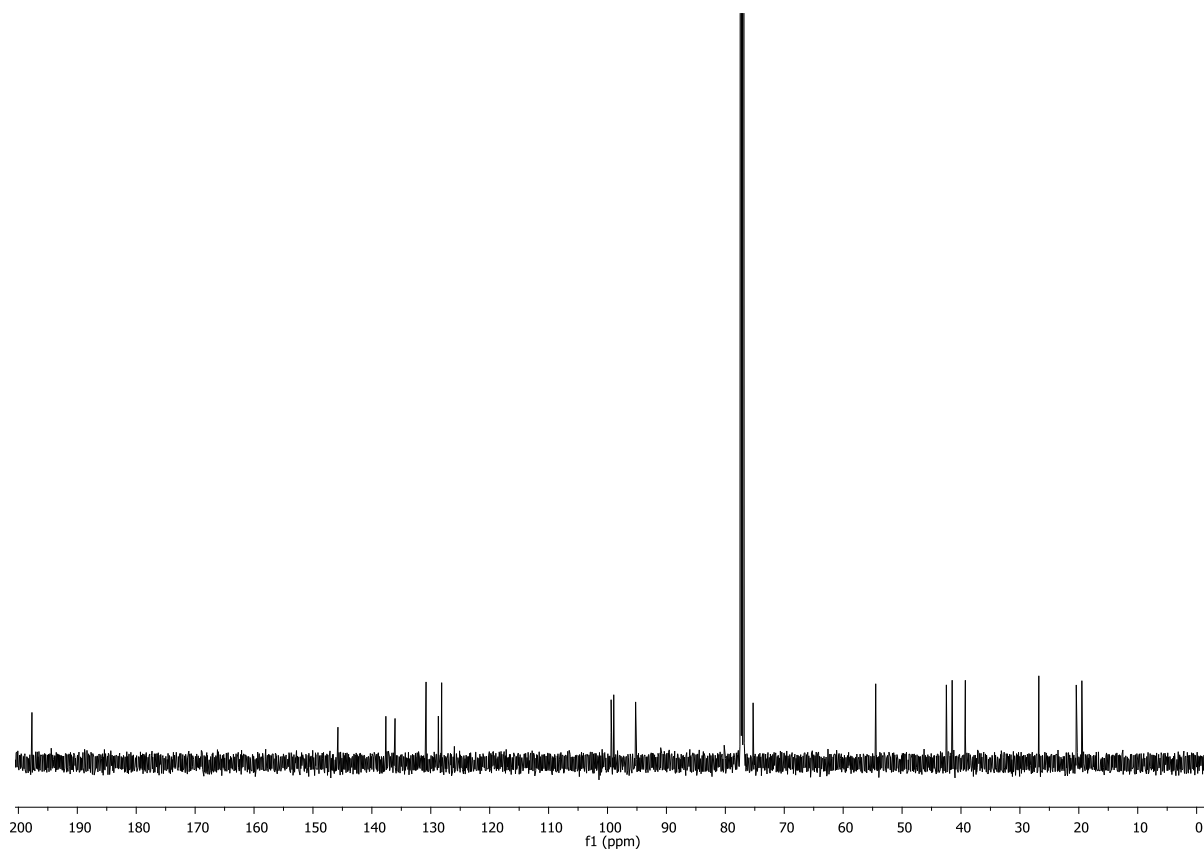

**2,8,9-Trimethyl-5-(2-oxopropyl)-4H-benzo[h]chromene-4-one (48)**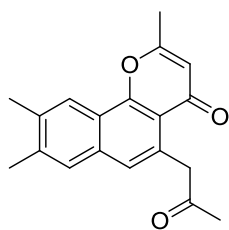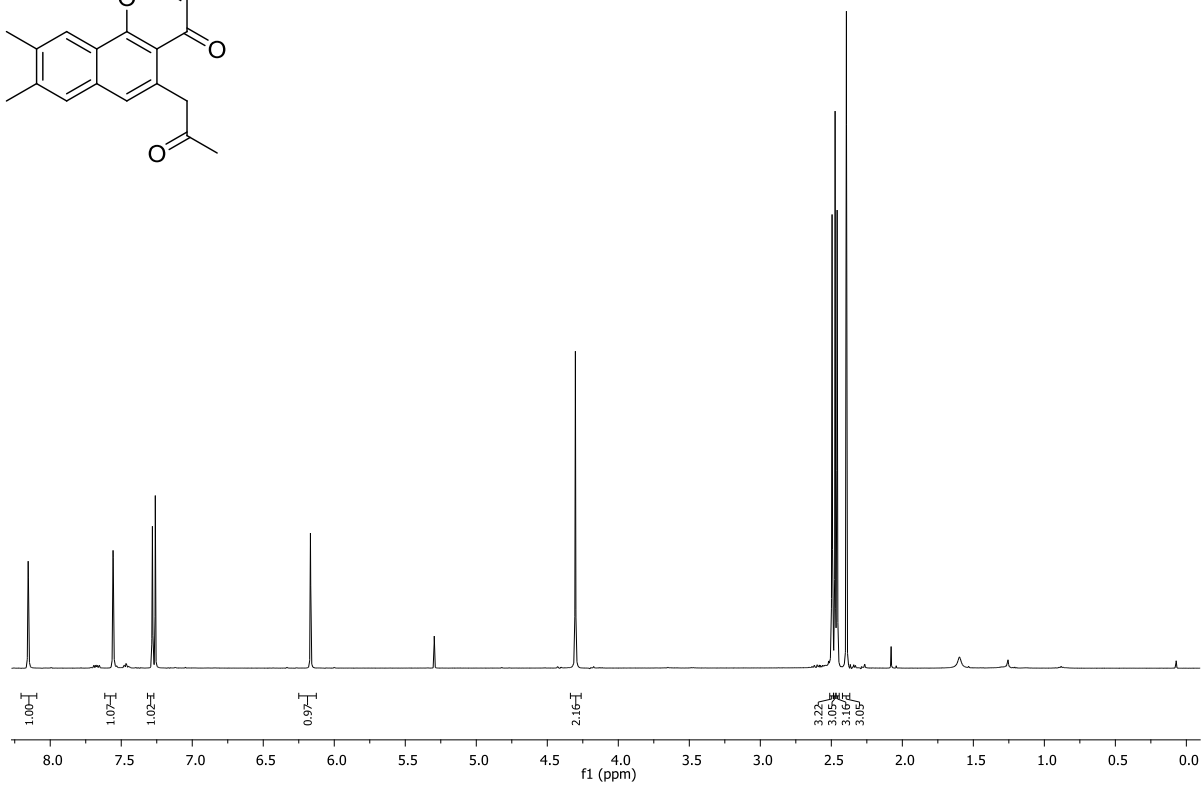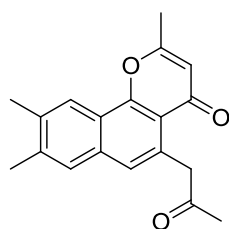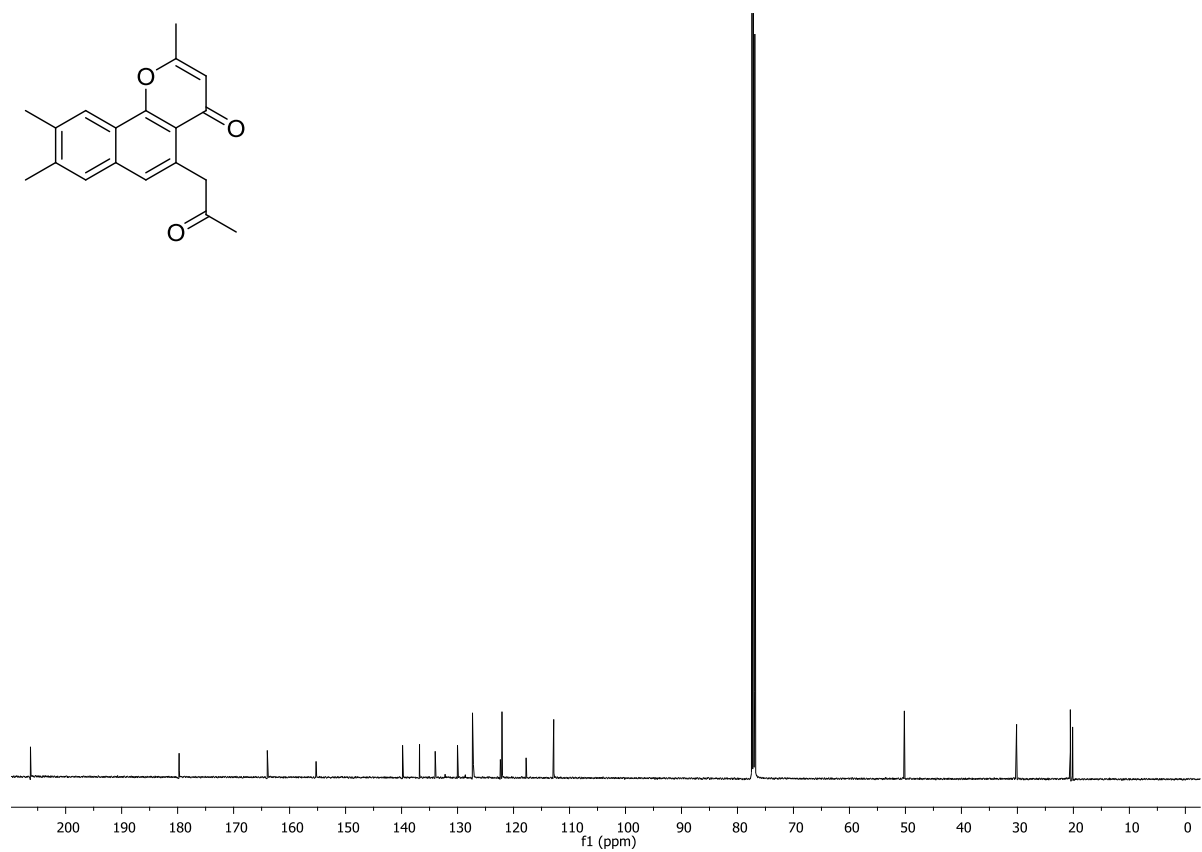

**3,3'-Diacetyl-4,4'-dihydroxy-2,2',6,6',7,7'-hexamethyl-9,9'-bianthracene-10,10'(9*H*,9'*H*)-dione (47)**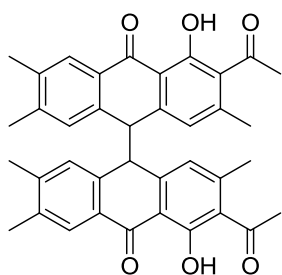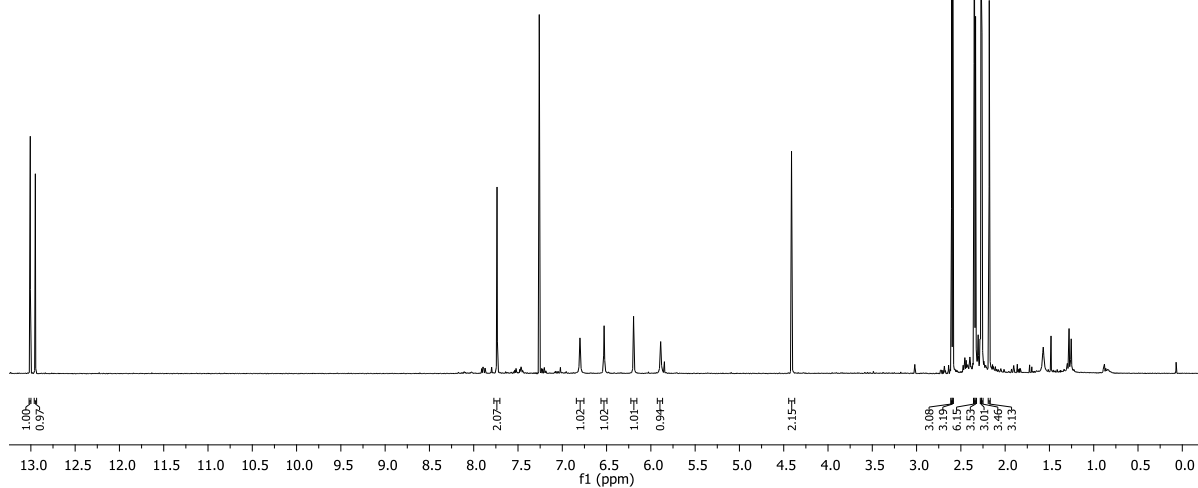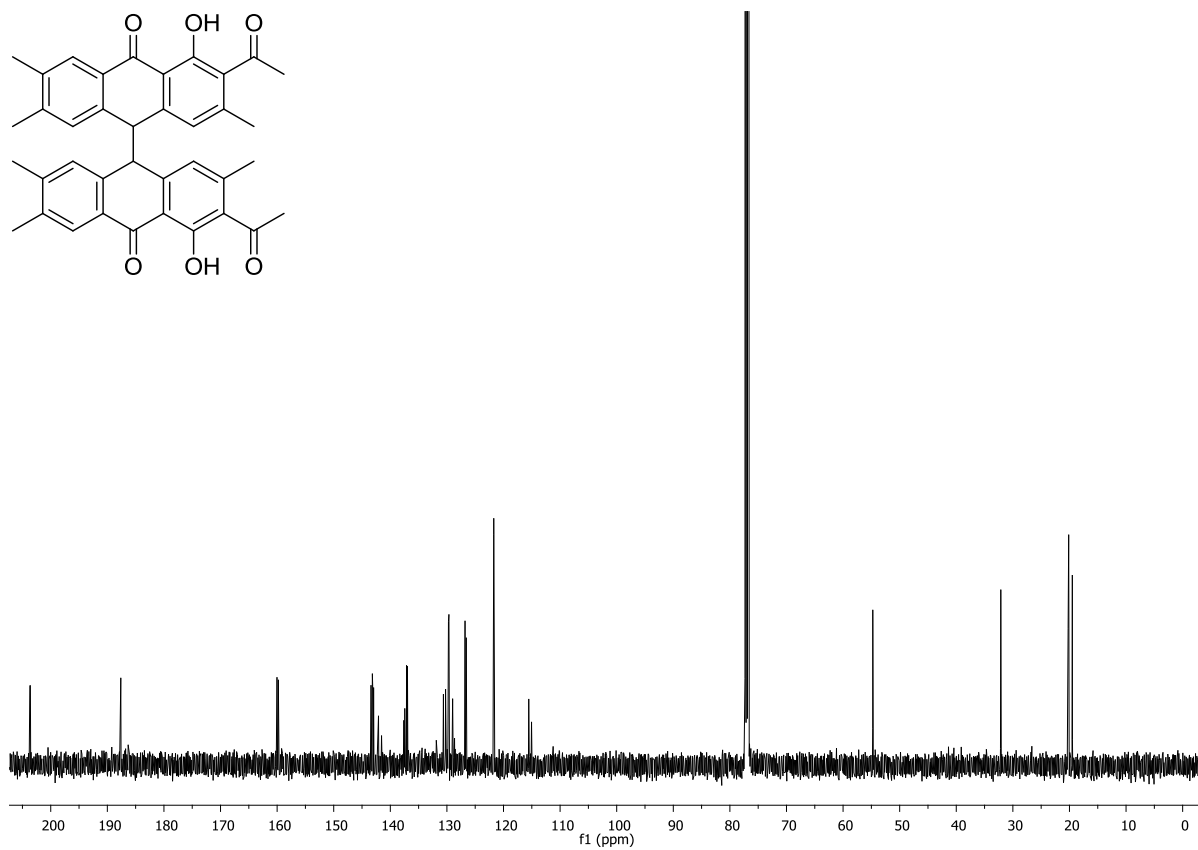



**2-Acetyl-1-hydroxy-3,6,7-trimethylantracene-9,10-dione (9)**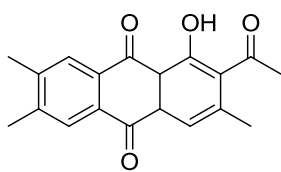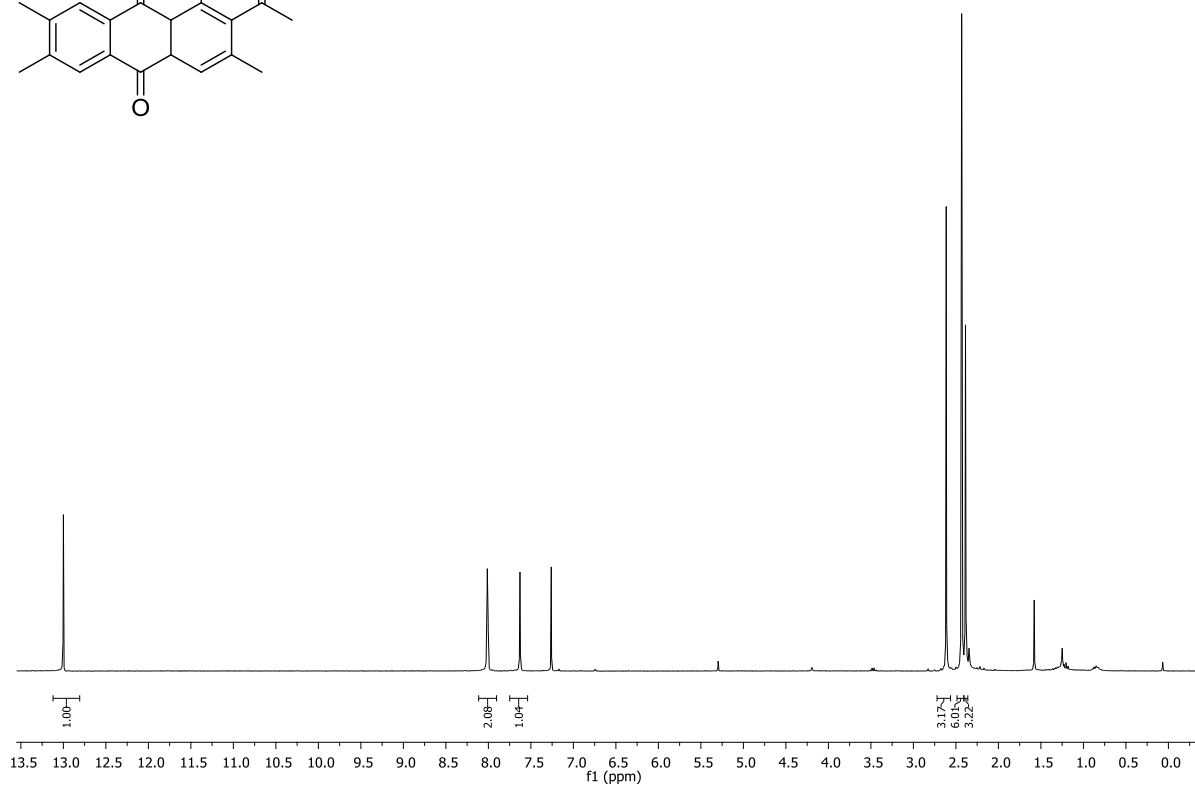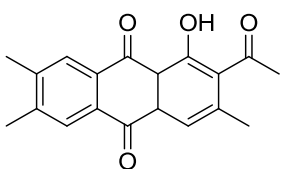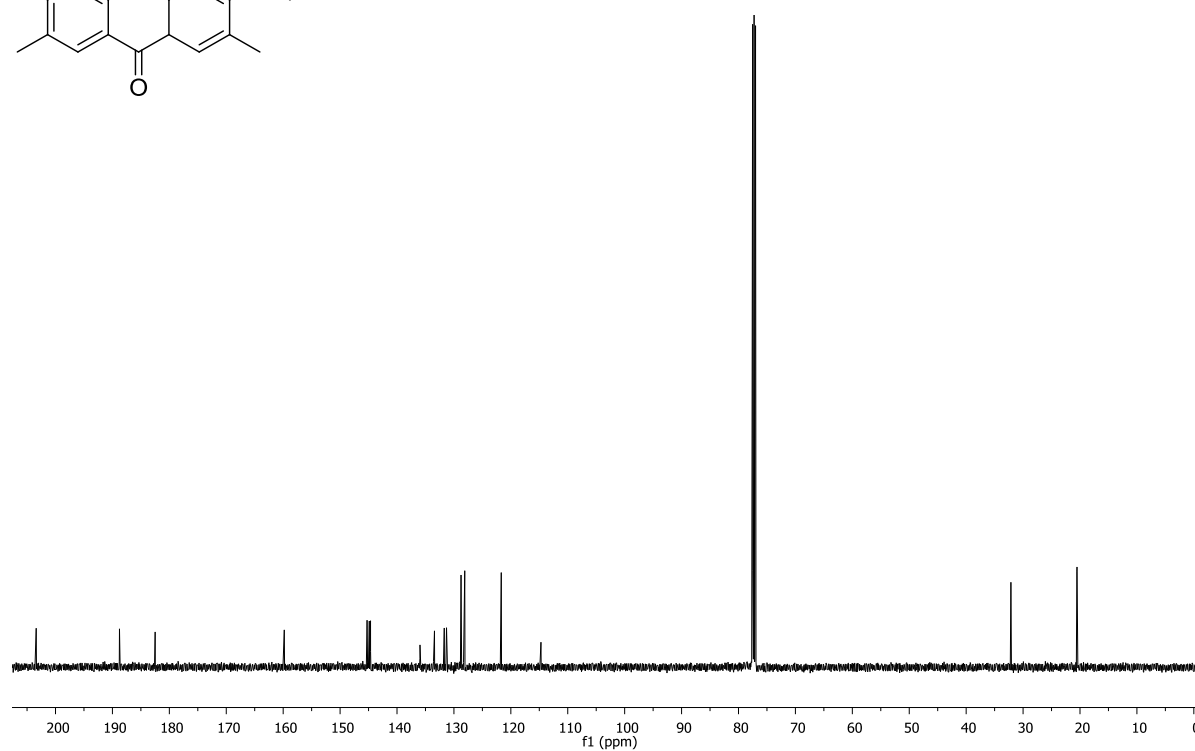

**KWANZOQUINONE A (44)**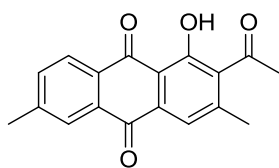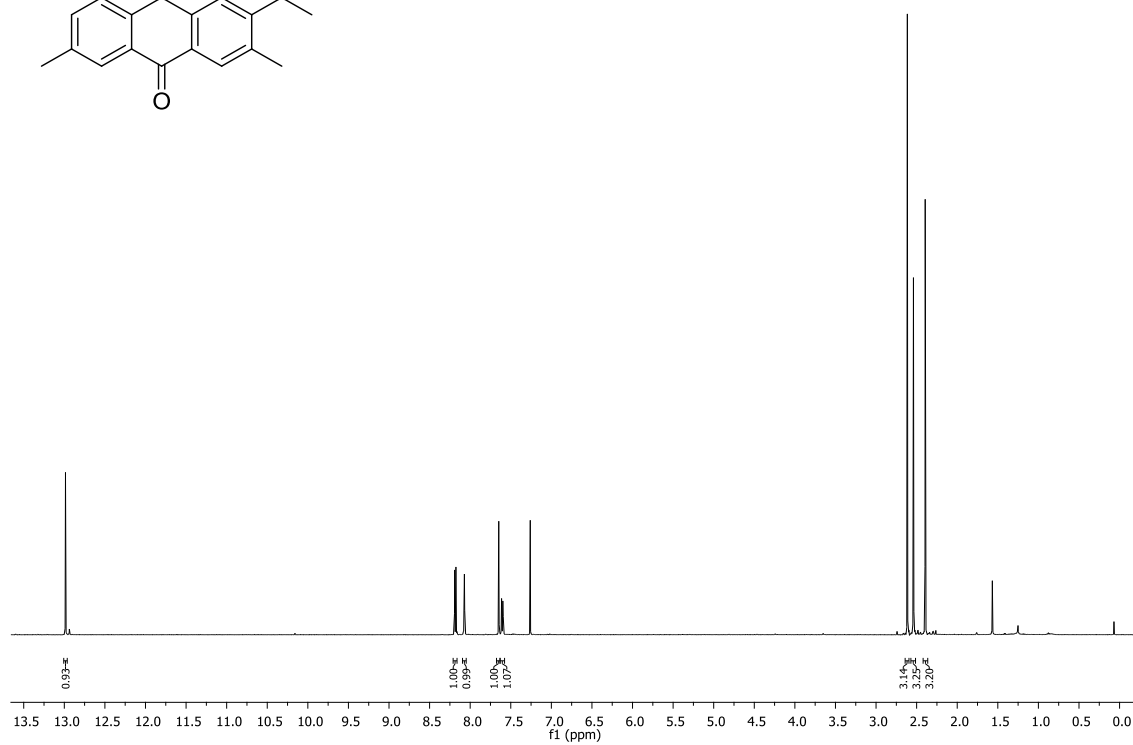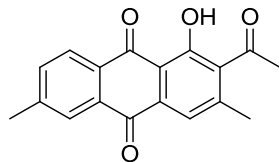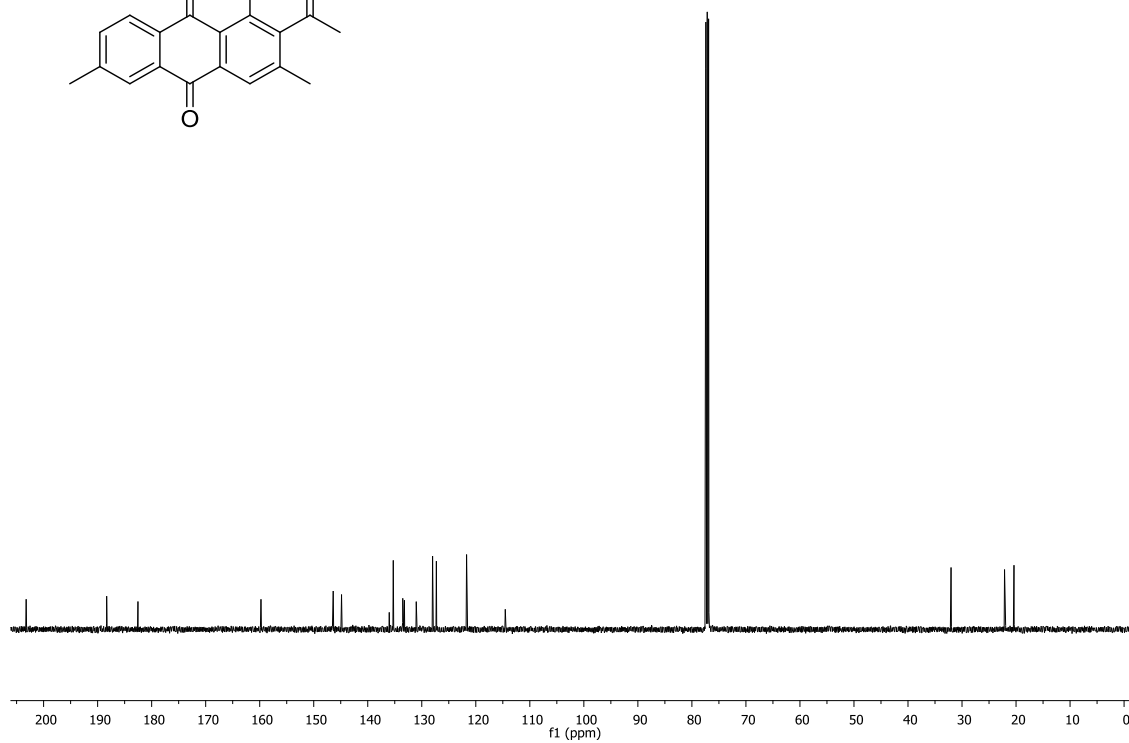

Supplement: Supplementary file 1 [file 3864145]
